# Supplementary material for: COVID-19 cross-sectional study in Maricá, Brazil: The impact of vaccination coverage on viral incidence
Source: PLoS One. 2022 Sep 19;17(9):e0269011. doi: 10.1371/journal.pone.0269011 (PMC9484680; doi:10.1371/journal.pone.0269011)
Supplement: S1 Data — (XLSX) [file pone.0269011.s002.xlsx]

## Sheet: RAW DATA
SUBJECT	ROUND	DISTRICT	GENDER	AGE	AGE_CAT	SCHOOLING	LOCK_DOWN_1	LOCK_DOWN_2	MASK_1	MASK_2	HAND	ALCOHOL_1	ALCOHOL_2	SUBJ_COVID_1	COVID_TEST	PCR_TEST	IGG_TEST	ANTIGEN_TEST	CLIA	CLINIC_DIAG	PCR_RES	IGG_RES	ANTIGEN_RES	CLIA_RES	CLINIC_DIAG_RES	SYMPT	HOSPIT	RELAT	FEVER	HEADACHE	AGEUSIA	ANOSMIA	COUGH	BODY_ACHE	SORE_THROAT	DIZZINESS	CORYZA	DIARRHEA	VOMIT	HYPER	DIABETES	RESP	VACCINE	VAC_TYPE	1ST_JAB	2ND_JAB	DAYS_BJAB	DAYS_LJAB	FULL_IMMU
1	1	2	2	56	1	3	0	0	1	1	2	1	1	3	1	1	0	0	0	0	2					1	1	3	0	0	0	0	0	0	0	0	1	0	0	1	0	0	0		0	0
2	1	2	2	59	1	2	1	1	1	1	2	1	1	3	0											0	0	3	0	0	0	0	0	0	0	0	0	0	0	0	0	0	0		0	0
3	1	2	1	34	1	7	1	1	1	1	2	1	1	3	0											0	0	3	0	0	0	0	0	0	0	0	1	0	0	0	0	0	0		0	0
4	1	2	2	30	1	7	0	0	1	1	2	1	1	3	0											0	0	3	0	0	0	0	0	0	0	0	0	0	0	0	0	0	1	1	1	1	33	6	0
5	1	2	2	36	1	5	1	1	1	1	2	1	1	3	0											0	0	1	0	0	0	0	0	0	0	0	0	0	0	0	0	0	0		0	0
6	1	2	1	61	2	3	1	1	1	1	2	1	1	3	0											0	0	1	0	0	0	0	0	0	0	0	0	0	0	0	0	0	1	2	1	0		28	0
7	1	2	1	88	2	8	1	1	1	1	1	1	1	2	0											0	0	3	0	0	0	0	0	0	0	0	0	0	0	0	0	0	1	2	1	1	89	21	1
8	1	2	2	69	2	5	1	1	1	1	1	1	1	2	0											0	0	3	0	0	0	0	0	0	0	0	0	0	0	1	0	0	1	1	1	1	44	5	0
9	1	2	2	50	1	2	1	1	1	1	2	1	1	2	1	1	0	0	1	0	3			3		0	0	1	0	0	0	0	0	0	0	0	0	0	0	1	0	0	0		0	0
10	1	2	1	70	2	2	0	0	1	1	2	1	1	2	0											0	0	3	0	0	0	0	0	0	0	0	0	0	0	0	0	0	1	1	1	1	21	35	1
11	1	2	2	51	1	8	1	1	1	1	2	0	3	2	0											1	0	1	0	0	0	0	0	0	0	0	1	0	0	0	0	0	0		0	0
12	1	2	1	65	2	4	1	1	1	1	2	1	1	2	0											0	0	3	0	0	0	0	1	1	0	0	0	0	0	1	0	0	1	1	1	1	33	5	0
13	1	2	1	39	1	5	1	1	1	2	2	1	1	1	1	1	1	0	1	0	3	3		3		0	0	3	0	1	0	0	0	0	0	1	1	0	0	1	0	0	0		0	0
14	1	2	2	55	1	7	1	1	1	1	2	1	1	1	1	1	0	0	1	0	3			1		0	0	1	0	1	0	0	0	1	0	0	0	0	0	1	0	0	0		0	0
15	1	2	2	67	2	5	1	1	1	1	2	1	1	2	1	1	0	0	1	0	1			1		0	0	1	0	0	0	0	0	0	0	0	1	0	0	1	0	0	1	1	1	1	17	31	1
16	1	3	2	40	1	5	1	1	1	1	2	1	1	2	0											1	0	3	0	1	0	0	1	0	0	0	1	0	0	1	0	0	1	3	1	0		8	0
17	1	2	1	25	1	7	1	0	1	1	2	1	2	3	0											0	0	3	0	0	0	0	0	0	0	0	0	0	0	0	0	0	0		0	0
18	1	1	1	65	2	2	1	1	1	1	1	1	1	1	0											0	0	3	0	1	0	0	0	0	0	0	0	0	0	1	0	0	1	1	1	1	33	13	0
19	1	2	2	46	1	4	1	1	1	1	2	1	1	2	0											0	0	1	0	0	0	0	0	0	0	0	0	0	0	0	1	0	0		0	0
20	1	2	1	44	1	5	0	0	1	1	2	1	1	2	0											1	0	1	0	1	0	0	1	1	0	0	1	1	0	0	0	0	0		0	0
21	1	1	2	72	2	2	1	1	1	1	1	1	1	2	0											0	0	3	1	1	1	1	0	1	0	0	0	0	0	1	1	0	1	1	1	1	33	22	1
22	1	2	1	40	1	2	1	1	0	2	2	1	1	2	0											0	0	1	0	0	0	0	1	0	0	0	0	0	0	0	0	0	0		0	0
23	1	2	2	68	2	8	1	1	1	1	2	1	1	2	0											0	0	1	0	0	0	0	0	1	0	1	1	0	0	1	1	0	1	1	1	1	33	14	1
24	1	2	2	53	1	2	1	1	1	1	2	1	1	2	0											1	0	1	0	0	0	0	1	0	0	0	1	0	0	1	1	0	0		0	0
25	1	2	1	66	2	8	1	1	1	1	2	1	1	2	1	0	1	0	0	0		1				0	0	1	0	0	0	0	0	0	0	0	0	0	0	1	1	0	1	1	1	1	28	24	1
26	1	2	1	30	1	5	1	1	1	1	2	1	1	1	1	1	0	1	1	0	1		3	1		0	0	1	0	0	0	0	0	0	0	0	0	0	0	0	0	0	0		0	0
27	1	2	1	49	1	8	1	1	1	1	2	1	1	1	1	1	0	0	0	0	2					1	0	1	0	0	0	0	0	0	0	0	1	0	0	1	0	0	1	2	1	0		0	0
28	1	2	1	74	2	2	1	1	1	1	1	1	1	2	1	1	1	0	0	0	1	1				1	0	3	0	1	0	0	0	0	0	0	1	0	0	1	1	0	1	1	1	1	21	42	1
29	1	2	1	68	2	4	1	1	1	1	2	1	1	2	1	0	0	1	0	0			1			0	0	3	0	0	0	0	1	0	0	0	0	0	0	0	0	0	1	1	1	1	32	14	1
30	1	2	2	40	1	4	0	0	1	1	2	1	1	3	0											0	0	3	0	0	0	0	0	0	0	0	0	0	0	0	0	0	0		0	0
31	1	2	1	67	2	2	1	1	1	1	2	1	1	3	0											0	0	1	0	0	0	0	0	0	0	0	0	0	0	1	0	0	1	1	1	1	28	15	1
32	1	2	2	67	2	2	1	1	1	1	2	1	1	1	1	1	0	0	0	0	3					0	0	3	0	0	0	0	0	0	0	0	0	0	0	0	0	0	1	1	1	1	40	6	0
33	1	2	2	61	2	8	1	1	1	1	2	1	1	3	0											0	0	1	0	0	0	0	0	0	0	0	0	0	0	1	0	0	1	2	1	0		29	0
34	1	2	2	51	1	2	1	1	1	1	2	1	1	3	0											0	0	3	0	0	0	0	0	0	0	0	0	0	0	0	0	0	0		0	0
35	1	2	2	49	1	8	0	0	0	1	1	1	1	2	0											0	0	3	0	0	0	0	0	0	0	0	0	0	0	0	0	0	1	1	1	1	23	97	1
36	1	2	2	71	2	5	1	1	1	1	1	1	1	2	0											0	0	3	0	0	0	0	0	0	0	0	0	0	0	1	1	0	1	1	1	1	21	38	1
37	1	1	2	67	2	2	1	1	1	1	2	1	1	3	0											0	0	3	0	0	0	0	0	0	0	0	0	0	0	1	0	0	1	1	1	1	33	23	1
38	1	2	2	67	2	4	1	1	1	1	1	1	1	2	0											1	0	3	0	0	0	1	1	1	0	0	0	0	0	1	1	0	1	1	1	1	12	21	1
39	1	2	2	49	1	5	1	0	1	1	1	1	1	2	0											0	0	3	0	0	0	0	0	0	0	0	0	0	0	1	0	1	1	1	1	1	34	6	0
40	1	2	1	49	1	8	1	1	1	1	1	1	1	2	1	0	0	1	0	0			1			0	0	3	0	0	0	0	0	0	0	0	0	0	0	1	0	0	1	1	1	1	21	14	1
41	1	2	1	56	1	6	1	1	1	1	2	1	1	3	0											0	0	2	0	0	0	0	0	0	0	0	0	0	0	0	0	0	0		0	0
42	1	2	2	68	2	4	1	1	1	1	1	1	1	2	0											0	0	1	0	0	0	0	0	0	0	0	0	0	0	1	1	0	1	1	1	1	33	15	1
43	1	2	2	83	2	3	1	1	1	1	2	1	1	3	0											1	0	1	1	1	0	0	1	1	1	0	0	0	0	1	1	0	1	1	1	1	21	46	1
44	1	2	1	34	1	8	1	0	1	1	2	1	1	1	1	1	0	0	0	0	2					1	0	3	0	1	0	0	0	0	1	0	1	0	0	0	0	0	0		0	0
45	1	2	1	23	1	4	1	1	1	1	2	1	1	3	0											0	0	1	0	1	0	0	0	0	0	0	0	0	0	0	0	0	0		0	0
46	1	2	1	45	1	2	1	1	1	2	2	1	2	3	0											0	0	3	0	0	0	0	0	0	0	0	1	0	0	0	0	0	0		0	0
47	1	2	2	30	1	5	1	1	1	1	2	1	1	3	0											1	0	3	0	1	0	1	1	1	1	1	0	0	0	0	0	0	0		0	0
48	1	2	1	35	1	5	0	0	1	1	2	1	1	3	0											1	0	3	0	0	0	0	1	0	0	0	1	0	0	0	0	0	0		0	0
49	1	1	2	66	2	7	1	1	1	1	2	1	1	2	0											0	0	3	0	0	0	0	0	0	0	0	0	0	0	0	1	0	1	1	1	1	21	43	1
50	1	2	2	26	1	5	0	0	1	1	2	1	1	3	0											0	0	3	0	1	0	0	0	0	0	0	0	0	0	0	0	0	0		0	0
51	1	2	2	56	1	5	1	1	1	1	2	1	1	2	1	1	0	0	0	0	2					0	0	1	0	0	0	0	0	0	0	0	0	0	0	0	0	0	0		0	0
52	1	2	1	46	1	8	1	1	1	1	2	1	1	2	0											0	0	3	0	0	0	0	0	0	0	0	1	0	0	0	0	0	0		0	0
53	1	2	1	22	1	5	1	1	1	2	2	1	1	3	0											0	0	2	0	0	0	0	0	0	0	0	0	0	0	0	0	0	0		0	0
54	1	2	2	27	1	8	1	0	1	1	1	1	1	2	1	0	0	0	1	0				1		1	0	1	0	0	0	0	1	0	1	0	0	0	0	0	0	1	0		0	0
55	1	2	2	30	1	5	1	1	1	1	2	1	1	2	1	1	0	0	0	0	2					1	0	3	1	1	1	1	1	1	1	0	0	0	1	0	0	0	0		0	0
56	1	2	1	54	1	3	1	1	1	1	2	1	1	1	1	0	0	0	1	0				3		1	0	1	0	0	0	0	0	0	0	0	0	0	0	1	0	0	0		0	0
57	1	2	1	25	1	5	1	0	1	1	2	1	2	2	1	0	0	1	1	0			1	1		1	0	3	0	1	0	1	1	1	1	1	1	1	1	0	0	0	0		0	0
58	1	1	2	65	2	3	1	1	1	1	2	1	1	2	0											1	0	3	0	0	0	0	0	0	0	0	0	0	0	0	0	0	1	1	1	1	33	15	1
59	1	2	2	70	2	2	1	1	1	1	2	1	1	1	1	0	0	0	1	0				3		1	0	1	0	1	0	0	1	0	0	1	0	0	0	1	0	0	1	1	1	1	21	15	1
60	1	2	2	70	2	8	1	1	1	1	2	0	4	2	1	1	0	0	0	0	1					0	0	3	0	0	0	0	0	0	0	0	0	0	0	1	0	1	1	1	1	1	21	35	1
61	1	2	2	45	1	2	1	1	1	1	2	1	1	2	0											0	0	3	0	0	0	0	0	0	0	0	0	0	0	1	0	0	0		0	0
62	1	1	2	64	2	3	1	1	1	1	2	1	1	2	0											1	0	1	0	0	0	0	0	0	0	0	0	0	0	0	0	0	1	1	1	1	31	13	0
63	1	2	1	63	2	5	1	1	1	1	2	1	1	2	0											1	0	3	0	1	0	0	0	1	1	0	1	0	0	1	0	1	1	2	1	0		31	0
64	1	2	2	58	1	2	1	0	1	1	2	1	1	1	1	1	0	0	0	0	3					0	0	1	0	0	0	0	0	0	0	1	0	0	0	0	1	0	1	2	1	0		0	0
65	1	3	1	68	2	5	1	1	1	1	1	1	1	2	0											0	0	3	0	0	0	0	0	0	0	0	0	0	0	1	0	0	1	1	1	1	32	17	1
66	1	2	2	65	2	5	1	1	1	1	2	1	1	2	1	1	0	0	1	0	1			1		0	0	1	0	1	0	0	1	1	0	1	0	1	0	1	0	0	0		0	0
67	1	2	2	55	1	8	1	1	1	1	2	1	1	1	1	1	0	0	1	0	3			3		0	1	1	0	0	0	0	0	0	0	0	0	0	0	0	1	0	1	2	1	0		18	0
68	1	2	1	27	1	7	1	0	1	1	1	1	2	2	1	1	0	0	0	0	2					1	0	1	0	1	0	0	0	0	1	0	1	0	0	0	0	0	0		0	0
69	1	2	2	73	2	2	1	1	1	1	2	1	1	2	1	0	0	1	0	0			1	1		0	0	3	0	0	0	0	0	0	0	1	0	0	0	1	1	0	1	1	1	1	21	36	1
70	1	2	2	42	1	2	1	1	1	1	2	1	1	2	0											0	0	1	0	0	0	0	0	0	0	0	0	0	0	0	0	0	0		0	0
71	1	2	1	29	1	4	1	1	1	1	2	1	1	3	0											0	1	3	0	0	0	0	0	0	0	0	0	0	0	0	0	0	0		0	0
72	1	1	1	48	1	7	1	1	1	1	1	1	1	2	0											0	0	3	0	0	0	0	0	0	0	0	0	0	0	0	1	0	1	1	1	1	21	18	1
73	1	3	2	52	1	5	1	0	1	1	1	1	1	2	0											1	0	1	0	0	0	0	1	1	1	0	0	1	1	1	1	1	1	2	1	1	16	0	0
74	1	3	1	66	2	5	0	0	0	1	1	1	1	2	0											0	0	1	0	0	0	0	0	0	0	0	0	0	0	1	0	0	1	1	1	1	21	22	1
75	1	3	2	43	1	9	1	1	1	1	1	1	1	2	0											0	0	3	0	0	0	0	0	0	0	0	0	0	0	0	0	0	0		0	0
76	1	3	2	75	2	2	1	1	1	1	1	1	1	2	1	0	0	0	1	0				1		0	0	3	0	0	0	0	0	0	0	0	0	0	0	1	0	0	1	1	1	1	32	53	1
77	1	1	2	62	2	5	1	1	1	1	2	1	1	2	0											0	0	3	0	0	0	0	0	0	0	0	0	0	0	1	0	0	1	2	1	0		18	0
78	1	3	1	45	1	4	1	0	1	2	1	1	2	2	0											0	0	3	0	0	0	0	0	0	0	0	0	0	0	1	0	0	0		0	0
79	1	3	1	54	1	7	1	1	1	1	1	1	1	2	0											0	0	3	0	0	0	0	0	0	0	0	0	0	0	0	0	0	0		0	0
80	1	1	2	38	1	5	0	0	0	1	1	1	1	2	0											0	0	3	0	0	0	0	0	0	0	0	0	0	0	1	0	0	1	2	1	0		19	0
81	1	1	2	62	2	2	1	1	1	1	2	1	1	2	1	1	0	0	1	0	1			1		0	0	3	0	0	0	0	0	0	0	0	0	0	0	1	1	0	1	2	1	0		20	0
82	1	3	2	68	2	5	1	1	1	1	1	1	1	2	0											0	0	2	0	0	0	0	0	0	0	0	0	0	0	0	0	0	1	1	1	1	45	1	0
83	1	3	2	47	1	5	1	1	1	1	2	1	1	2	1	0	0	0	1	0				1		0	0	3	0	0	0	0	0	0	0	0	0	0	0	1	1	0	0		0	0
84	1	3	2	41	1	2	0	0	1	1	2	1	1	3	0											1	0	3	0	0	0	0	0	0	0	0	1	0	0	0	0	0	0		0	0
85	1	3	2	67	2	2	1	1	1	1	1	1	1	3	0											0	0	3	0	0	0	0	0	0	0	0	0	0	0	1	0	1	1	2	1	0		0	0
86	1	3	2	62	2	2	1	1	1	1	1	1	1	2	1	0	1	0	0	0		1				0	0	3	0	0	0	0	0	0	0	0	0	0	0	1	0	0	1	2	1	0		36	0
87	1	3	2	32	1	5	1	1	1	1	1	1	1	3	0											0	0	2	0	0	0	0	0	0	0	0	0	0	0	0	0	0	0		0	0
88	1	3	2	70	2	1	1	1	1	1	1	1	1	3	0											0	0	3	0	0	0	0	0	0	0	0	0	0	0	0	0	0	1	1	1	0		43	0
89	1	2	1	67	2	5	1	1	1	1	2	1	1	3	0											0	0	1	0	0	0	0	0	0	0	0	0	0	0	1	1	0	1	1	1	1	33	12	0
90	1	3	2	53	1	2	1	1	1	1	1	1	1	3	0											0	0	3	0	0	0	0	0	0	0	0	0	0	0	0	0	0	0		0	0
91	1	3	2	48	1	2	1	1	1	1	2	1	1	2	0											1	0	3	0	0	0	0	0	0	0	0	1	0	0	0	0	0	0		0	0
92	1	3	1	21	1	5	1	1	1	1	2	1	1	2	0											1	0	3	0	0	0	0	0	0	0	0	0	0	0	0	0	1	0		0	0
93	1	2	1	43	1	4	1	0	1	1	2	1	1	2	1	0	0	0	1	0				1		1	0	3	0	0	0	0	0	0	0	0	1	0	0	0	0	0	0		0	0
94	1	2	1	38	1	8	1	1	1	1	2	1	1	2	1	0	1	0	1	0		1		1		1	0	1	0	0	1	1	1	0	1	0	0	0	0	1	0	0	0		0	0
95	1	2	1	47	1	2	0	0	1	1	2	1	1	3	0											1	0	3	0	1	0	0	0	1	0	0	1	0	0	0	0	0	0		0	0
96	1	2	2	46	1	5	1	1	1	1	2	1	1	3	0											0	0	1	0	0	0	0	0	0	0	0	0	0	0	0	0	0	0		0	0
97	1	2	2	42	1	2	0	0	1	1	2	1	1	2	0											1	0	3	0	1	0	0	1	0	1	0	1	0	0	0	0	0	0		0	0
98	1	1	1	48	1	5	0	0	1	1	2	1	1	3	0											0	0	3	0	0	1	1	0	0	0	0	0	0	0	0	0	1	1	2	1	0		21	0
99	1	2	2	31	1	4	1	0	1	2	1	1	1	2	1	0	0	0	1	0				1		0	0	3	1	1	1	1	0	0	0	0	0	0	0	0	0	0	0		0	0
100	1	2	1	51	1	5	0	0	1	1	2	1	1	3	1	1	0	0	0	0	1					0	0	3	0	0	0	0	0	0	0	0	0	0	0	1	0	0	0		0	0
101	1	3	1	55	1	8	1	1	1	1	2	1	1	2	1	0	1	0	0	0		1				0	0	3	0	0	0	0	0	0	0	0	0	0	0	1	0	0	1	2	1	0		22	0
102	1	2	1	41	1	2	1	1	1	1	2	1	1	2	0											0	0	3	0	0	0	0	0	0	0	0	0	0	0	0	0	0	0		0	0
103	1	2	2	50	1	8	1	1	1	1	2	1	1	2	0											0	0	3	0	0	0	0	0	0	0	0	0	0	0	0	0	0	1	2	1	0		10	0
104	1	2	1	68	2	2	1	1	1	1	2	1	1	2	0											0	0	3	0	0	0	0	0	0	0	0	0	0	0	1	0	0	0		0	0
105	1	1	1	68	2	5	1	1	1	1	2	1	1	1	1	1	0	0	0	0	3					1	0	1	0	0	0	0	1	1	1	0	1	0	0	1	1	1	1	1	1	1	32	22	1
106	1	2	1	45	1	8	0	0	1	1	2	1	3	2	1	1	1	0	0	0	1	1				0	0	1	0	0	0	0	0	0	0	0	0	0	0	1	0	0	0		0	0
107	1	2	2	40	1	5	1	1	1	1	2	1	1	2	0											0	0	3	0	0	0	0	0	0	0	0	0	0	0	1	1	1	0		0	0
108	1	2	2	34	1	5	1	1	1	2	1	1	1	1	1	0	0	0	1	0				3		0	0	1	1	1	1	1	0	0	0	0	0	0	0	0	0	0	0		0	0
109	1	2	2	58	1	2	1	1	1	1	1	1	1	1	1	0	0	0	1	0				1		0	0	1	0	0	0	0	0	0	0	0	0	0	0	0	0	0	0		0	0
110	1	3	1	55	1	8	1	1	1	1	1	1	1	2	1	1	0	0	1	0	1			1		0	0	3	0	0	0	0	0	0	0	0	0	0	0	0	1	0	1	3	1	0		22	0
111	1	3	2	54	1	1	0	0	0	4	2	1	2	2	0											0	0	3	0	1	0	0	0	0	0	1	0	0	0	1	0	0	0		0	0
112	1	3	1	53	1	5	1	1	1	1	2	1	1	3	0											0	0	1	0	0	0	0	0	0	0	0	0	0	0	0	0	0	0		0	0
113	1	3	2	27	1	4	1	1	1	1	2	1	1	2	1	0	0	0	1	0				1		0	0	3	0	0	0	0	0	0	0	0	0	0	0	1	0	0	0		0	0
114	1	3	1	64	2	8	1	1	1	2	2	1	1	2	1	0	0	0	1	0				1		0	0	1	0	0	0	0	0	0	0	0	0	0	0	1	0	0	1	1	1	1	21	87	1
115	1	1	2	71	2	4	1	1	1	1	2	1	1	3	1	1	0	0	0	0	1					1	0	3	0	0	0	0	0	0	0	0	0	0	0	1	0	0	1	1	1	1	30	23	1
116	1	2	2	38	1	8	1	1	1	1	2	1	1	2	1	1	0	0	0	0	1					0	0	1	0	0	0	0	0	0	1	0	0	0	0	0	0	0	1	1	1	1	27	29	1
117	1	3	2	31	1	5	1	1	1	1	2	1	1	3	0											1	0	1	0	0	0	0	0	0	0	0	1	0	0	0	0	0	0		0	0
118	1	3	1	84	2	8	1	1	1	1	2	1	1	2	0											0	0	3	0	0	0	0	0	0	0	0	0	0	0	1	0	0	1	1	1	1	21	48	1
119	1	3	2	41	1	6	1	1	1	1	2	1	1	3	0											0	0	1	0	1	0	0	0	0	0	0	1	0	0	0	0	0	0		0	0
120	1	2	1	49	1	5	1	1	1	1	2	1	1	3	0											0	0	3	0	0	0	0	0	0	0	0	1	0	0	0	0	0	0		0	0
121	1	3	1	56	1	8	1	1	1	1	2	1	1	2	0											0	0	3	0	0	0	0	0	0	0	0	0	0	0	0	0	0	0		0	0
122	1	2	2	43	1	7	1	1	1	1	2	1	1	1	0											0	0	1	0	0	0	0	0	1	0	0	0	0	0	0	0	0	0		0	0
123	1	3	2	57	1	8	1	1	1	1	1	1	1	2	0											0	0	1	0	0	0	0	0	0	0	0	0	0	0	0	0	0	1	2	1	1	21	43	1
124	1	3	2	58	1	2	1	1	1	1	2	1	1	1	1	0	0	0	1	0				3		0	0	3	0	0	0	0	0	0	0	0	0	0	0	1	0	0	1	2	1	0		21	0
125	1	3	1	69	2	5	1	1	1	1	1	1	1	2	0											0	0	3	0	0	0	0	0	0	0	0	0	0	0	0	1	0	1	1	1	1	46	11	0
126	1	3	1	37	1	5	1	0	1	1	1	1	1	2	0											0	0	3	0	0	0	0	0	0	0	0	0	0	0	0	0	0	0		0	0
127	1	3	2	56	1	2	1	1	1	1	1	1	1	2	0											0	0	3	0	0	0	0	0	0	0	0	0	0	0	1	0	0	1	2	1	1	21	0	0
128	1	3	2	49	1	2	1	1	1	1	1	1	1	2	0											1	0	2	0	0	1	1	1	1	1	0	1	0	0	1	0	0	0		0	0
129	1	3	2	67	2	2	1	1	1	1	1	1	2	2	0											0	0	1	0	0	0	0	0	0	0	0	0	0	0	1	1	0	1	1	1	1	40	9	0
130	1	1	1	53	1	5	1	1	1	1	2	1	1	3	0											0	0	3	0	0	0	0	0	0	0	0	0	0	0	1	0	0	0		0	0
131	1	1	1	75	2	5	0	0	1	2	2	1	2	3	1	1	0	0	1	0	1			1		0	0	3	0	0	0	0	0	0	0	0	0	0	0	1	0	0	1	1	1	1	28	41	1
132	1	3	2	65	2	8	1	1	1	1	2	1	1	3	0											0	0	1	0	0	0	0	0	0	0	0	0	0	0	1	0	0	1	2	1	0		42	0
133	1	3	2	47	1	5	1	1	1	1	2	1	1	2	0											1	0	1	0	0	0	0	1	0	0	0	0	0	0	0	0	0	0		0	0
134	1	1	1	54	1	5	1	1	1	1	1	1	1	2	0											0	0	3	0	0	0	0	0	0	0	0	0	0	0	1	0	0	1	2	1	0		25	0
135	1	3	2	40	1	2	1	1	1	1	2	1	2	3	1	0	0	1	0	0			1			0	0	1	0	0	0	0	0	0	0	0	0	0	0	0	0	0	0		0	0
136	1	2	2	68	2	6	1	1	1	1	2	1	1	3	0											1	0	3	0	1	0	0	0	1	0	0	1	1	0	1	0	1	1	1	1	1	33	25	1
137	1	3	2	37	1	6	1	1	1	1	2	1	1	2	1	1	0	0	1	0	1			1		0	0	3	0	1	0	0	1	0	0	0	0	0	0	0	0	1	0		0	0
138	1	2	2	66	2	8	0	0	1	1	2	1	1	2	1	1	0	0	0	0	1					0	0	3	0	0	0	0	0	1	0	1	0	1	0	1	0	0	1	1	1	1	31	17	1
139	1	2	2	68	2	4	1	1	1	1	2	1	1	2	1	0	1	0	0	0		1				0	0	2	0	0	0	0	0	0	0	0	0	0	0	1	0	0	1	1	1	1	21	28	1
140	1	1	2	56	1	5	1	1	1	1	2	1	1	3	0											1	0	3	0	1	0	0	1	1	1	0	1	0	0	1	0	0	1	2	1	0		28	0
141	1	3	2	47	1	5	1	1	1	1	2	1	1	2	1	1	0	0	0	0	1					0	0	3	0	1	0	0	0	1	0	0	1	0	0	0	0	0	0		0	0
142	1	3	2	41	1	4	1	1	1	1	2	1	1	2	0											0	0	3	0	0	0	0	0	0	0	0	0	0	0	1	0	0	0		0	0
143	1	3	2	51	1	4	1	1	1	1	2	1	1	3	0											1	0	1	0	1	0	0	1	1	0	0	1	0	0	1	0	0	0		0	0
144	1	3	2	41	1	2	1	1	1	1	2	1	1	1	1	1	0	0	0	0	3					0	0	3	0	0	0	0	0	0	0	0	0	0	0	1	0	0	0		0	0
145	1	3	1	29	1	8	1	1	1	1	1	1	1	2	1	1	0	0	0	0	1					0	0	1	0	0	0	0	0	0	0	0	1	0	0	0	0	0	0		0	0
146	1	3	2	22	1	5	1	1	1	1	2	1	1	3	0											1	0	3	0	0	0	0	0	0	0	0	1	0	0	0	0	0	0		0	0
147	1	3	1	41	1	2	1	1	1	1	2	1	1	3	0											1	0	2	0	0	0	0	1	0	1	0	1	0	0	0	0	0	0		0	0
148	1	3	2	50	1	2	1	1	1	1	2	1	1	3	0											0	0	2	0	1	0	0	0	0	0	0	0	0	0	0	0	0	0		0	0
149	1	3	2	69	2	3	1	1	1	1	2	1	1	2	1	0	0	0	1	0				1		0	0	3	0	0	0	0	0	0	0	0	0	0	0	1	1	0	1	1	1	1	20	15	1
150	1	1	2	43	1	8	1	1	1	1	2	1	1	3	0											0	0	3	0	0	0	0	0	0	0	0	0	0	0	0	0	0	0		0	0
151	1	1	2	25	1	5	1	1	1	1	2	1	1	1	1	1	1	0	1	0	3	3		3		0	0	3	0	0	0	0	0	0	0	0	0	0	0	0	0	0	1	2	1	1	70	24	1
152	1	1	2	45	1	7	1	1	1	1	2	1	1	3	0											0	0	1	0	0	0	0	0	0	0	0	0	0	0	1	0	0	0		0	0
153	1	1	1	61	2	4	1	1	1	1	2	1	1	2	1	0	0	1	0	0			1			0	0	3	0	0	0	0	0	0	0	0	0	0	0	0	0	0	0		0	0
154	1	2	2	43	1	7	1	1	1	1	2	1	1	2	1	1	1	0	0	0	1	1				1	0	3	0	0	0	0	0	0	0	0	0	0	0	1	0	0	0		0	0
155	1	2	1	46	1	7	1	1	1	1	2	1	1	2	1	1	1	0	1	0	1	1		1		0	0	1	0	0	0	0	0	0	0	0	0	0	0	0	0	0	0		0	0
156	1	2	2	66	2	2	1	1	1	1	2	1	1	2	0											0	0	1	0	0	0	0	0	0	0	0	0	0	0	1	1	0	1	1	1	1	33	10	0
157	1	2	1	66	2	4	1	1	1	1	1	1	1	2	1	0	0	1	0	0			1			0	0	3	0	0	0	0	0	0	0	0	0	0	0	0	0	0	1	1	1	0		44	0
158	1	3	2	39	1	2	1	1	1	1	1	1	1	3	0											0	0	3	0	0	0	0	0	0	0	0	0	0	0	0	0	0	0		0	0
159	1	3	1	69	2	6	1	1	1	1	2	1	1	3	0											0	0	3	0	0	0	0	0	0	1	0	1	0	0	0	0	1	1	3	1	0		0	0
160	1	3	2	35	1	8	1	1	1	1	2	1	1	3	0											1	0	3	0	0	0	0	0	1	0	0	0	0	0	0	0	0	0		0	0
161	1	3	2	25	1	4	1	1	1	1	2	1	1	3	0											0	0	3	0	1	0	0	0	0	0	0	0	0	0	0	0	0	0		0	0
162	1	3	1	30	1	4	1	1	1	1	2	1	1	3	0											0	0	3	0	0	0	0	0	1	0	0	0	0	0	0	0	0	0		0	0
163	1	3	2	36	1	2	1	1	1	1	2	1	1	3	0											1	0	3	0	0	0	0	1	0	1	0	0	0	0	0	0	0	0		0	0
164	1	1	2	56	1	5	1	1	1	1	2	1	1	2	1	1	0	0	0	0	1					0	0	1	0	0	0	0	0	0	0	0	0	0	0	1	1	0	1	2	1	0		28	0
165	1	3	2	56	1	2	1	0	1	1	2	1	1	2	0											0	0	3	0	1	0	0	0	1	1	1	0	0	0	1	0	0	0		0	0
166	1	1	1	57	1	5	1	1	1	1	1	1	1	2	0											0	0	3	0	0	0	0	0	0	0	0	0	0	0	0	0	0	0		0	0
167	1	1	2	84	2	5	0	0	0	1	1	1	1	2	0											0	0	3	0	0	0	0	0	0	0	0	0	0	0	0	0	0	1	1	1	1	21	52	1
168	1	1	2	43	1	5	1	1	1	1	1	1	1	2	0											0	0	3	0	0	0	0	0	0	0	0	0	0	0	0	0	0	0		0	0
169	1	3	1	57	1	1	1	1	1	1	2	1	1	3	0											0	0	2	0	0	0	0	0	0	0	0	0	0	0	0	1	0	1	2	1	0		28	0
170	1	1	1	41	1	8	1	1	1	1	1	1	1	2	0											0	0	3	0	0	0	0	0	0	0	0	0	0	0	0	0	0	0		0	0
171	1	1	1	57	1	5	1	1	1	1	1	1	1	2	0											0	0	1	0	0	0	0	0	0	0	0	0	0	0	0	0	0	0		0	0
172	1	1	2	87	2	1	1	1	1	1	1	1	1	2	0											0	1	1	0	0	0	0	0	0	0	0	0	0	0	1	0	0	1	1	1	1	28	66	1
173	1	1	2	55	1	5	1	1	1	1	1	1	1	1	0											0	0	1	0	0	0	0	0	0	0	0	0	0	0	0	0	0	0		0	0
174	1	2	2	24	1	6	1	1	1	1	2	1	1	3	0											0	0	1	0	0	0	0	0	0	0	0	0	0	0	0	0	0	1	2	1	1	88	29	1
175	1	1	2	50	1	2	1	1	1	1	1	1	1	2	0											0	0	3	1	1	0	0	1	1	0	0	1	0	0	1	0	0	0		0	0
176	1	1	2	37	1	2	1	1	1	1	2	1	1	3	1	1	0	0	0	0	2					1	0	2	0	0	0	0	0	0	0	0	0	0	0	1	0	1	1	2	1	0		26	0
177	1	1	2	61	2	5	1	1	1	1	2	1	1	2	1	0	0	1	0	0			1			0	0	3	0	0	0	0	0	0	0	0	0	0	0	1	1	1	1	2	1	0		42	0
178	1	1	1	36	1	2	1	1	0	3	2	0	3	3	0											0	0	3	0	0	0	0	0	0	0	0	0	0	0	0	0	0	0		0	0
179	1	1	1	39	1	2	1	1	1	1	2	1	1	3	1	1	0	0	0	0	2					0	0	3	0	0	0	0	0	0	0	0	0	0	0	0	0	0	0		0	0
180	1	2	1	39	1	2	1	1	1	1	2	1	1	2	1	0	0	0	1	0				1		1	0	3	0	0	0	0	0	0	0	0	0	0	0	0	0	0	0		0	0
181	1	1	1	80	2	2	0	0	1	1	1	1	1	3	0											0	0	3	0	0	0	0	0	0	0	0	0	0	0	1	0	1	1	1	1	1	21	42	1
182	1	2	2	73	2	2	1	1	1	1	1	1	1	2	1	1	0	0	0	0	1					1	0	3	0	0	0	0	0	0	0	0	0	0	0	0	0	0	1	1	1	1	21	42	1
183	1	1	1	55	1	5	1	1	1	1	2	1	1	3	0											0	0	3	0	0	0	0	0	0	0	0	0	0	0	0	0	0	0		0	0
184	1	1	1	19	1	5	1	1	1	1	2	1	1	3	0											0	0	1	0	0	0	0	0	0	0	0	1	0	0	0	0	0	0		0	0
185	1	1	2	58	1	2	1	1	1	1	2	1	1	3	0											0	0	3	0	0	0	0	0	0	0	0	0	0	0	0	0	0	0		0	0
186	1	1	1	22	1	6	1	1	1	1	2	1	1	3	0											0	0	1	0	0	0	0	0	0	0	0	0	0	0	0	0	0	0		0	0
187	1	1	1	68	2	4	1	1	1	1	2	1	1	2	1	1	0	0	1	0	1			2		1	0	3	0	0	0	0	1	1	0	1	1	0	0	1	0	0	1	1	1	1	35	21	1
188	1	1	1	22	1	7	1	1	1	1	2	1	2	3	0											1	0	3	1	1	0	0	1	1	1	0	1	0	0	0	0	0	0		0	0
189	1	1	2	63	2	8	1	1	1	1	2	1	1	2	0											0	0	3	0	0	0	0	0	0	0	0	0	0	0	0	0	0	1	2	1	0		49	0
190	1	1	1	52	1	4	1	1	1	1	2	1	1	2	0											0	0	3	0	0	0	0	0	0	0	0	0	0	0	0	0	0	0		0	0
191	1	1	2	58	1	8	1	1	1	1	2	1	1	2	0											1	0	3	1	1	0	1	0	1	1	1	1	0	1	1	0	0	1	2	1	0		29	0
192	1	1	1	48	1	5	1	1	1	1	2	0	2	2	1	0	1	0	0	0		1				0	0	1	0	0	0	0	0	0	0	0	0	0	0	1	0	1	0		0	0
193	1	1	2	62	2	2	1	1	1	1	2	1	1	3	0											0	0	2	0	0	0	0	0	0	1	0	0	0	0	1	0	0	1	2	1	0		35	0
194	1	1	1	50	1	4	1	1	1	1	1	1	1	2	1	1	1	0	0	0	1	1				1	0	1	0	0	0	0	1	0	0	0	1	0	0	0	0	0	0		0	0
195	1	1	1	36	1	4	1	1	1	2	2	1	1	3	0											1	0	3	0	1	0	0	1	1	1	0	1	1	0	0	0	0	0		0	0
196	1	1	2	43	1	8	1	1	1	1	2	1	1	2	1	1	0	0	0	0	1					0	0	1	0	0	0	0	0	0	0	0	0	0	0	1	0	0	1	2	1	1	89	30	1
197	1	3	2	45	1	9	1	0	1	1	2	1	1	2	1	0	0	0	1	0				1		0	0	1	0	1	0	0	1	0	1	0	0	0	0	0	0	0	0		0	0
198	1	1	2	21	1	5	1	0	1	1	2	1	1	3	0											1	0	3	0	1	0	0	0	0	0	1	0	0	0	0	0	0	0		0	0
199	1	1	1	74	2	5	1	1	1	1	2	1	1	2	0											0	0	3	0	0	0	0	0	0	0	0	0	0	0	0	0	0	1	1	1	1	21	45	1
200	1	1	1	56	1	5	0	0	1	1	2	1	1	2	0											0	0	1	0	0	0	0	0	0	0	0	0	0	0	1	0	0	0		0	0
201	1	1	1	43	1	5	0	0	1	1	2	1	1	2	1	0	0	0	1	0				1		0	0	3	0	0	0	0	0	0	0	0	0	0	0	0	0	0	0		0	0
202	1	1	2	60	2	8	1	1	1	1	2	1	1	2	0											0	0	1	0	0	0	0	0	0	0	0	0	0	0	1	1	0	1	2	1	0		34	0
203	1	1	1	56	1	5	1	1	1	1	2	1	1	3	1	0	0	0	1	0				2		0	0	1	0	1	0	0	0	0	0	0	0	0	0	1	1	0	0		0	0
204	1	1	2	60	2	5	1	1	1	1	2	1	1	3	0											1	0	1	0	0	0	0	0	0	1	0	1	0	0	1	0	0	1	2	1	0		18	0
205	1	1	2	60	2	2	1	1	1	1	2	1	1	3	0											1	0	2	1	1	0	0	0	1	0	0	1	0	0	1	0	0	1	2	1	0		33	0
206	1	1	1	59	1	2	1	1	1	1	2	1	1	2	0											0	0	2	0	0	0	0	0	0	0	0	0	0	0	0	0	0	0		0	0
207	1	3	2	68	2	5	1	1	1	1	1	1	1	2	0											0	1	3	0	0	0	0	0	0	0	0	0	0	0	1	1	0	1	1	1	1	20	62	1
208	1	3	2	71	2	2	1	1	1	1	2	1	1	3	0											0	0	3	0	0	0	0	0	0	0	0	0	0	0	0	0	0	1	1	1	1	21	42	1
209	1	3	2	68	2	8	1	1	1	1	2	1	1	2	1	0	1	0	0	0		1				0	0	3	0	0	0	0	0	0	0	0	0	0	0	1	0	0	1	1	1	1	50	4	0
210	1	3	2	66	2	8	1	1	1	1	2	1	1	3	0											1	0	3	1	0	0	0	1	1	1	1	0	0	0	1	1	0	0		0	0
211	1	3	1	20	1	2	1	1	1	1	2	1	1	3	0											0	0	3	0	0	0	0	1	0	0	0	0	1	0	0	0	0	0		0	0
212	1	3	1	47	1	2	0	0	1	1	2	1	1	3	0											0	0	3	0	0	0	0	0	0	0	0	0	0	0	1	0	0	0		0	0
213	1	3	2	57	1	2	1	1	1	1	2	1	1	2	0											0	0	3	0	0	0	0	0	0	0	0	0	0	0	1	0	0	0		0	0
214	1	2	2	68	2	8	1	1	1	1	1	1	1	1	1	0	0	0	1	0				3		0	0	3	1	1	0	1	1	1	0	0	0	0	0	0	0	0	1	2	1	0		47	0
215	1	1	2	49	1	6	1	1	1	1	1	1	1	2	0											0	0	3	0	0	0	0	0	0	0	0	0	0	0	0	0	0	0		0	0
216	1	1	1	19	1	5	1	1	1	1	1	1	1	2	0											0	0	3	0	0	0	0	0	0	0	0	0	0	0	0	0	0	0		0	0
217	1	1	1	65	2	5	1	1	1	1	1	1	1	2	0											0	0	3	0	0	0	0	0	0	0	0	0	0	0	0	0	0	1	1	1	1	33	13	0
218	1	1	1	57	1	2	1	1	1	1	1	1	1	2	0											0	0	3	0	0	0	0	0	0	0	0	0	0	0	0	0	0	0		0	0
219	1	2	2	59	1	2	1	1	1	1	2	1	1	1	1	1	0	0	0	0	3					1	1	3	1	1	1	0	1	1	1	1	1	1	0	1	1	0	1	2	1	0		32	0
220	1	1	2	63	2	4	1	0	0	1	1	1	1	2	0											0	0	3	0	0	0	0	0	0	0	0	0	0	0	1	1	1	1	2	1	1	84	-41	0
221	1	1	2	69	2	6	1	1	1	1	2	1	1	2	1	1	1	0	0	0	1	1				1	0	3	0	0	0	0	0	0	0	0	1	0	0	0	1	0	1	1	1	1	28	33	1
222	1	2	2	61	2	5	1	1	1	1	2	1	1	3	1	1	0	0	0	0	1					0	0	1	0	0	0	0	0	0	0	0	0	1	0	0	0	0	1	2	1	0		34	0
223	1	2	2	70	2	3	1	1	1	1	2	1	1	2	0											1	0	1	0	1	0	0	1	0	0	0	1	0	0	1	0	0	1	1	1	1	21	34	1
224	1	1	1	25	1	5	1	1	1	2	2	1	2	1	1	0	0	0	1	0				3		0	0	2	0	1	0	0	0	0	0	0	0	0	0	0	0	0	0		0	0
225	1	1	2	32	1	5	1	1	1	1	2	1	2	3	0											1	0	2	0	1	0	0	1	0	1	0	1	0	0	0	0	0	0		0	0
226	1	1	1	33	1	8	1	1	1	1	2	1	2	3	0											1	0	2	0	1	0	0	1	0	0	0	0	0	0	0	0	0	0		0	0
227	1	3	1	60	2	2	1	1	1	1	2	1	1	3	0											0	0	3	0	0	0	0	0	0	0	0	1	0	0	1	1	0	1	2	1	0		34	0
228	1	1	2	60	2	2	1	1	1	1	2	1	1	3	1	0	1	0	0	0		1				0	0	2	0	1	0	0	0	0	0	0	0	0	0	1	0	1	1	2	1	0		34	0
229	1	2	2	73	2	2	1	1	1	1	2	1	1	2	0											0	0	3	0	0	0	0	0	0	0	0	0	0	0	1	1	0	1	1	1	1	21	35	1
230	1	1	1	40	1	8	0	0	1	2	2	1	2	3	0											1	0	1	0	1	0	0	0	1	1	1	1	0	0	0	0	0	0		0	0
231	1	2	1	70	2	2	1	1	1	1	2	1	1	3	1	0	0	0	1	0				1		0	0	3	0	0	0	0	0	1	0	0	0	0	0	1	0	0	1	1	1	1	21	35	1
232	1	1	1	61	2	5	1	0	1	1	2	1	1	1	1	0	0	0	1	0				3		0	0	1	0	0	0	0	0	0	0	0	0	0	0	1	0	0	1	2	1	0		35	0
233	1	1	1	53	1	8	1	1	1	1	2	1	1	2	1	1	0	0	0	0	1					0	0	3	0	0	0	0	1	0	0	0	0	0	0	1	0	0	0		0	0
234	1	1	1	60	2	5	1	1	1	1	2	1	1	3	1	1	0	0	0	0	1					1	0	3	0	0	0	0	0	0	1	0	0	0	0	0	0	0	1	2	1	0		35	0
235	1	1	2	69	2	8	1	1	1	1	2	1	1	2	1	0	0	0	1	0				1		0	0	3	0	0	0	0	0	0	0	0	0	0	0	0	0	0	1	1	1	1	21	36	1
236	1	1	2	37	1	8	1	1	1	1	2	1	1	1	1	1	0	0	0	0	3					0	0	2	0	1	0	0	0	0	0	0	1	0	0	0	0	0	0		0	0
237	1	1	1	39	1	7	1	1	1	1	2	1	1	1	1	1	1	0	1	1	3	3		3	3	0	0	1	0	0	0	0	0	0	0	0	0	0	0	0	0	0	1	1	1	1	21	109	1
238	1	1	2	31	1	8	1	1	1	1	1	1	1	3	0											1	0	3	0	1	0	0	0	1	1	0	1	1	0	0	0	0	0		0	0
239	1	2	2	72	2	8	1	1	1	1	2	1	1	1	1	1	0	0	0	0	1					0	0	1	0	0	0	0	0	0	0	0	0	0	0	0	1	0	1	1	1	1	21	36	1
240	1	1	2	38	1	4	1	1	1	1	2	1	1	1	1	1	0	0	0	0	3					0	0	1	0	1	0	0	1	0	0	0	0	0	0	0	0	0	0		0	0
241	1	1	2	37	1	8	1	1	1	1	2	1	1	1	1	1	0	0	0	0	3					0	0	1	0	0	0	0	0	0	0	0	0	0	0	0	0	0	0		0	0
242	1	2	2	63	2	5	1	1	1	1	2	1	1	1	1	1	0	1	0	0	3		3			0	1	1	0	0	0	0	0	0	0	0	0	0	0	1	1	0	1	2	1	0		36	0
243	1	1	2	43	1	5	1	1	1	1	2	1	1	3	0											0	0	3	0	1	0	0	1	1	1	1	1	0	0	0	0	0	0		0	0
244	1	1	2	50	1	5	1	1	1	1	2	1	1	2	0											0	0	1	0	0	0	0	1	0	0	0	0	0	0	1	0	0	0		0	0
245	1	1	2	34	1	8	1	1	1	1	2	1	1	3	1	1	0	0	0	0	2					0	0	3	1	1	0	0	0	1	0	1	0	1	1	0	0	0	0		0	0
246	1	1	2	22	1	5	1	1	1	1	2	0	3	3	0											0	0	3	0	1	0	0	1	1	1	0	0	0	0	0	0	0	0		0	0
247	1	1	2	60	2	5	1	1	1	1	1	1	1	2	0											0	1	1	0	0	0	0	0	0	0	0	0	0	0	1	0	0	1	2	1	0		36	0
248	1	1	2	72	2	5	1	1	1	1	2	1	1	2	1	0	1	0	0	0		1				0	0	3	0	0	0	0	0	0	0	0	0	0	0	1	0	0	1	1	1	1	21	42	1
249	1	3	2	62	2	8	1	1	1	1	1	1	1	2	0											0	0	3	0	0	0	0	0	0	0	0	0	0	0	0	0	0	1	2	1	1	32	17	1
250	1	3	2	61	2	8	1	1	1	1	2	1	1	2	1	0	1	0	0	0		1				0	0	3	0	0	0	0	0	0	0	0	0	0	0	0	0	0	1	2	1	0		37	0
251	1	1	2	71	2	3	1	1	1	1	2	1	1	2	1	0	1	0	0	0		1				0	0	1	0	0	0	0	0	0	0	0	0	0	0	1	0	1	1	1	1	1	21	42	1
252	1	1	1	60	2	8	1	1	1	1	2	1	1	2	1	0	1	0	0	0		1				1	0	1	0	0	0	0	1	1	1	1	0	0	1	1	0	0	1	2	1	0		39	0
253	1	3	2	61	2	5	1	1	1	1	2	1	1	1	1	1	0	0	0	0	3					0	0	1	0	1	0	0	0	0	0	0	1	0	0	0	0	0	1	2	1	0		37	0
254	1	1	2	63	2	2	1	1	1	1	2	1	1	3	0											0	0	3	0	0	0	0	0	0	0	0	0	0	0	0	0	0	1	2	1	0		37	0
255	1	1	2	39	1	8	1	1	1	1	2	1	1	2	0											0	0	3	0	0	0	0	0	0	0	0	0	0	0	0	0	0	0		0	0
256	1	1	2	19	1	4	1	1	1	1	2	1	1	3	0											0	0	1	0	0	0	0	0	0	0	0	0	0	0	0	0	0	0		0	0
257	1	1	2	39	1	5	1	1	1	1	2	1	1	3	0											0	0	3	0	0	0	0	0	0	0	0	0	0	0	0	0	0	0		0	0
258	1	1	2	38	1	2	1	1	1	1	1	1	1	3	0											0	0	3	0	0	0	0	0	0	0	0	0	0	0	0	0	0	0		0	0
259	1	1	1	26	1	7	1	1	1	1	2	1	1	3	1	0	0	1	0	0			1			0	0	1	0	0	0	0	0	0	0	0	0	0	0	0	0	0	0		0	0
260	1	1	2	28	1	2	1	1	1	1	2	1	1	2	0											0	0	2	0	0	0	0	0	0	0	0	0	0	0	0	0	0	0		0	0
261	1	1	2	21	1	4	1	1	1	1	2	1	1	3	0											1	0	2	0	0	0	0	0	0	0	0	0	0	0	0	0	0	0		0	0
262	1	1	1	41	1	5	1	1	1	1	2	1	1	2	1	1	0	0	0	0	1					1	0	3	0	0	0	0	0	0	0	0	0	0	0	0	0	0	1	2	1	1	85	28	1
263	1	1	1	56	1	5	1	1	1	1	1	1	1	2	0											0	0	3	0	0	0	0	0	0	0	0	0	0	0	1	0	0	1	2	1	0		29	0
264	1	1	2	20	1	5	1	1	1	1	1	1	1	2	0											0	1	1	1	1	0	0	1	1	0	0	1	0	0	0	0	0	0		0	0
265	1	1	1	54	1	5	1	1	1	1	1	1	1	2	0											1	0	3	0	0	0	0	0	0	0	0	0	0	0	0	0	0	0		0	0
266	1	2	2	74	2	2	1	1	1	1	2	1	1	2	0											0	0	1	0	1	0	0	0	1	0	0	0	0	0	1	0	0	1	1	1	1	21	38	1
267	1	3	1	71	2	2	1	1	1	1	2	1	1	2	0											0	0	3	0	0	0	0	0	0	0	0	0	0	0	0	1	0	1	1	1	1	21	38	1
268	1	1	1	19	1	5	0	0	1	1	1	1	1	2	0											0	0	3	0	0	0	0	0	0	0	0	0	0	0	0	0	0	0		0	0
269	1	1	2	56	1	7	1	1	1	1	1	1	1	1	0											0	0	1	1	1	1	1	1	1	1	1	1	1	1	1	0	0	0		0	0
270	1	1	2	54	1	5	1	1	1	1	1	1	1	2	0											0	0	3	1	1	0	0	1	1	1	1	1	0	0	1	0	0	0		0	0
271	1	1	2	39	1	7	1	1	1	1	1	1	1	2	0											0	0	1	0	0	0	0	0	0	0	0	0	0	0	0	0	0	0		0	0
272	1	1	1	57	1	5	0	0	1	1	2	1	1	1	1	1	0	0	0	0	3					0	0	1	0	0	0	0	0	0	0	0	0	0	0	1	0	0	0		0	0
273	1	1	1	71	2	5	0	0	1	1	2	1	1	2	1	0	1	0	0	0		1				1	0	1	0	0	0	0	0	0	0	0	0	0	0	1	0	1	1	1	1	1	21	42	1
274	1	1	1	34	1	9	1	0	1	1	2	1	1	2	1	1	1	1	1	0	1	1	1	1		1	0	3	0	0	0	0	0	0	1	0	0	0	0	0	0	0	0		0	0
275	1	1	2	52	1	5	1	1	1	2	2	1	1	2	1	0	0	0	1	0				1		0	0	1	0	0	0	0	0	0	0	0	0	0	0	0	0	0	1	1	1	1	21	39	1
276	1	1	1	39	1	9	0	0	1	1	2	1	2	1	1	1	1	0	1	0	1	1		3		0	0	3	0	1	0	0	0	1	0	0	0	0	1	0	0	0	0		0	0
277	1	1	1	24	1	5	1	1	1	1	2	1	1	2	0											0	0	3	0	0	0	0	0	1	0	0	0	0	0	0	0	0	0		0	0
278	1	1	2	22	1	5	1	1	1	1	2	1	1	2	0											0	0	3	0	1	0	0	0	0	0	0	0	0	0	0	0	0	0		0	0
279	1	1	2	70	2	5	1	1	1	1	1	1	1	2	0											1	0	3	0	0	0	0	0	0	0	0	0	0	0	1	0	0	1	1	1	1	21	41	1
280	1	1	2	62	2	4	1	1	1	1	2	1	1	2	1	0	1	0	0	0		1				0	0	3	0	1	0	0	0	0	0	0	1	1	0	1	0	0	1	2	1	0		42	0
281	1	1	2	40	1	5	0	0	1	1	1	1	1	1	1	1	0	0	0	0	3					0	0	1	0	1	0	0	0	0	0	0	0	0	0	0	0	0	0		0	0
282	1	1	1	36	1	5	1	1	1	1	2	1	1	1	1	1	1	0	0	0	3	3				1	0	3	0	0	0	0	1	0	0	0	1	0	0	0	0	1	0		0	0
283	1	1	2	52	1	4	1	1	1	1	2	1	1	3	0											0	0	3	0	0	0	0	1	0	0	0	0	0	0	0	0	0	0		0	0
284	1	1	1	56	1	5	1	1	1	1	2	1	1	3	0											0	0	3	0	0	0	0	0	0	0	0	0	0	0	0	0	0	0		0	0
285	1	1	1	64	2	9	1	1	1	1	2	1	1	1	1	1	0	0	0	0	2					0	0	3	0	1	0	0	1	0	1	0	1	0	0	1	0	0	1	2	1	1	43	0	0
286	1	1	2	59	1	4	1	1	1	1	2	1	1	2	1	0	0	0	1	0				1		1	0	1	1	1	0	0	1	1	1	1	1	0	1	1	0	1	1	2	1	0		34	0
287	1	3	2	23	1	5	1	1	1	1	2	1	1	1	1	1	0	0	0	0	3					0	0	1	0	1	0	0	0	0	0	0	0	0	0	0	0	0	0		0	0
288	1	1	1	42	1	7	1	1	1	1	2	1	1	2	1	1	0	0	0	0	1					0	0	3	0	0	0	0	0	0	0	0	0	0	0	0	0	0	0		0	0
289	1	1	2	75	2	5	1	1	1	1	2	1	1	1	1	1	0	0	0	0	1					0	0	2	0	1	0	0	1	1	0	0	1	0	0	1	0	0	1	2	1	0		26	0
290	1	1	2	86	2	2	1	1	1	1	2	1	1	2	1	1	0	0	0	0	1					1	0	3	0	0	0	0	1	1	0	0	1	0	0	1	0	0	1	1	1	1	21	68	1
291	1	1	2	63	2	8	1	1	1	1	2	1	1	3	0											0	0	3	0	0	0	0	0	0	0	0	0	0	0	1	0	0	1	2	1	0		43	0
292	1	1	1	44	1	5	1	1	1	1	2	1	1	2	1	0	0	1	0	0			1			0	0	1	0	0	0	0	0	0	0	0	0	0	0	0	0	0	0		0	0
293	1	1	1	59	1	2	1	1	1	1	2	1	1	3	1	0	0	1	0	0			1			0	0	3	0	0	0	0	0	0	0	0	0	0	0	1	0	0	1	2	1	0		8	0
294	1	1	1	69	2	5	1	1	1	1	2	1	1	2	1	0	1	0	0	0		1				0	0	3	0	0	0	0	0	0	0	0	0	0	0	0	0	0	1	1	1	1	21	42	1
295	1	1	1	31	1	5	1	1	1	1	2	1	1	2	1	1	0	0	1	0	1			1		0	0	3	0	0	0	0	0	0	0	0	0	0	0	0	0	0	0		0	0
296	1	1	1	25	1	2	1	0	1	2	1	1	1	3	0											0	0	3	0	0	0	0	0	0	0	0	0	0	0	0	0	0	0		0	0
297	1	1	2	55	1	2	1	1	1	1	2	1	1	2	0											0	0	3	0	0	0	0	0	0	0	0	0	0	0	0	0	0	0		0	0
298	1	1	2	22	1	5	1	1	1	1	2	1	1	1	1	0	0	0	1	0				3		0	0	3	0	0	0	0	0	0	0	0	0	0	0	0	0	0	0		0	0
299	1	1	1	61	2	8	1	1	1	1	2	1	1	2	1	0	1	0	0	0		1				0	0	2	0	1	1	0	0	1	0	1	0	1	0	0	0	0	1	2	1	0		42	0
300	1	1	2	35	1	2	1	1	1	1	2	1	1	3	0											0	0	3	0	0	0	0	0	0	0	0	0	0	0	0	0	0	0		0	0
301	1	3	1	75	2	3	1	1	1	1	1	1	1	2	0											0	0	3	0	0	0	0	0	0	0	0	0	0	0	1	0	0	1	1	1	1	21	43	1
302	1	1	2	38	1	5	1	1	1	1	2	1	1	3	0											1	0	3	0	0	0	0	1	0	0	0	1	0	0	0	0	0	0		0	0
303	1	1	1	39	1	8	1	1	1	1	2	1	1	1	1	0	0	0	1	0				1		1	0	3	0	1	1	1	0	0	1	0	1	0	0	0	0	0	1	2	1	0		43	0
304	1	1	1	32	1	7	1	1	1	1	2	1	1	2	1	0	1	0	0	0		2				0	0	3	0	0	0	0	0	0	0	0	0	0	0	0	0	1	0		0	0
305	1	1	2	33	1	5	1	1	1	1	2	1	1	3	1	1	1	0	0	0	1	3				1	0	1	0	0	0	0	0	0	0	0	1	0	0	0	0	0	0		0	0
306	1	1	2	63	2	3	0	0	0	3	2	1	1	2	0											0	0	3	0	0	0	0	0	0	0	0	0	0	0	1	0	0	1	2	1	0		43	0
307	1	1	2	70	2	1	1	1	1	1	2	1	2	2	0											0	0	3	0	1	0	0	1	0	0	0	0	0	0	1	0	0	1	1	1	1	21	44	1
308	1	1	2	54	1	5	1	1	1	1	2	1	1	1	1	1	0	0	0	0	3					0	0	3	0	0	0	0	0	0	0	0	0	0	0	1	1	0	0		0	0
309	1	1	1	83	2	5	1	1	1	1	2	1	1	3	0											1	0	3	0	1	0	0	1	1	1	1	1	0	0	1	0	0	1	1	1	1	21	54	1
310	1	1	1	48	1	8	1	1	1	1	2	1	1	3	0											0	0	3	0	0	0	0	0	0	0	0	0	0	0	0	0	0	0		0	0
311	1	1	2	59	1	4	1	1	1	1	2	1	1	3	0											0	0	3	0	0	0	0	1	1	1	0	0	1	0	0	0	0	0		0	0
312	1	1	2	48	1	4	1	1	1	1	2	1	1	3	0											0	0	3	0	1	0	0	0	1	0	1	0	1	0	0	0	0	0		0	0
313	1	1	1	25	1	4	1	1	1	1	2	1	1	2	1	0	0	0	1	0			1	1		1	0	1	0	1	0	1	1	0	0	0	0	0	0	1	0	0	0		0	0
314	1	1	2	39	1	5	1	1	1	1	2	1	1	3	1	1	0	0	1	0	1			1		1	0	1	1	1	1	0	1	1	1	0	1	1	0	0	0	1	0		0	0
315	1	1	2	76	2	1	1	1	1	1	2	1	1	2	1	0	0	1	0	0			1			0	0	1	0	0	0	0	0	0	0	0	0	0	0	1	0	0	1	1	1	1	24	47	1
316	1	1	2	77	2	5	1	1	1	2	2	1	1	3	1	1	0	0	0	0	1					0	0	2	0	0	0	0	0	0	0	0	0	0	0	0	1	0	1	1	1	1	20	48	1
317	1	1	1	24	1	4	1	1	1	1	2	1	1	3	0											0	0	3	0	0	0	0	1	0	0	0	0	0	0	0	0	0	0		0	0
318	1	1	1	81	2	5	1	1	1	1	1	1	1	1	0											0	1	1	1	1	1	1	1	1	1	1	1	1	1	0	0	0	1	2	1	0		41	0
319	1	3	2	54	1	3	1	1	1	1	1	1	1	2	0											0	0	3	0	0	0	0	0	0	0	0	0	0	0	0	0	0	0		0	0
320	1	3	1	75	2	3	1	1	1	1	1	1	1	2	0											0	0	3	0	0	0	0	0	0	0	0	0	0	0	0	0	0	1	1	1	1	21	49	1
321	1	3	2	48	1	3	1	1	1	1	1	1	1	2	0											1	0	3	0	0	0	0	0	0	0	0	0	0	0	0	0	0	0		0	0
322	1	2	2	22	1	5	1	0	1	1	1	1	1	2	0											0	0	3	0	0	0	0	0	0	0	0	0	0	0	0	0	0	0		0	0
323	1	2	2	69	2	5	1	1	1	1	1	1	1	2	0											0	0	3	0	0	0	0	0	0	0	0	0	0	0	1	0	0	0		0	0
324	1	2	1	70	2	2	1	1	1	1	1	1	1	2	0											0	0	3	0	0	0	0	0	0	0	0	0	0	0	0	0	0	1	1	1	1	25	3	0
325	1	2	1	65	2	8	1	1	1	1	1	1	1	2	0											0	0	3	0	0	0	1	0	0	0	0	0	0	0	1	0	0	1	1	1	1	33	16	1
326	1	2	2	53	1	8	1	1	1	1	1	1	1	1	1	1	0	0	0	0	3					0	0	1	0	0	1	1	0	0	0	0	0	0	0	0	0	0	0		0	0
327	1	2	1	43	1	5	1	0	1	1	1	1	1	2	0											0	0	3	0	0	0	0	0	0	0	0	0	0	0	0	0	0	0		0	0
328	1	1	1	81	2	2	1	1	1	1	2	1	2	2	0											0	0	1	0	0	0	0	0	0	0	0	0	0	0	1	1	0	1	1	1	1	21	50	1
329	1	3	2	41	1	8	1	1	1	1	2	1	1	3	0											0	0	3	0	0	0	0	0	0	0	0	0	0	0	0	0	0	0		0	0
330	1	3	2	64	2	5	1	1	1	1	2	1	1	3	0											0	0	2	0	0	0	0	0	0	0	0	0	0	0	0	0	1	1	2	1	0		45	0
331	1	3	1	23	1	8	1	1	1	1	2	1	1	3	0											0	0	3	0	0	0	0	0	0	0	0	0	0	0	0	0	0	0		0	0
332	1	3	2	57	1	5	1	1	1	1	1	1	1	3	0											0	0	2	0	0	0	0	0	0	0	0	0	0	0	1	0	0	1	2	1	0		38	0
333	1	3	2	60	2	8	1	1	1	1	2	1	1	3	0											0	0	3	0	0	0	0	0	0	0	0	0	0	0	1	1	0	1	1	1	1	28	15	1
334	1	2	1	78	2	2	1	1	1	1	2	1	1	3	0											0	0	1	0	0	0	0	0	1	0	1	0	0	0	0	0	0	1	1	1	1	21	51	1
335	1	3	2	90	2	3	1	1	1	1	2	1	1	1	1	1	0	0	1	0	3			3		0	1	3	0	0	0	0	0	0	0	0	0	0	0	1	0	0	1	1	1	1	22	169	1
336	1	1	1	36	1	3	1	1	1	2	2	1	1	2	1	0	0	0	1	0				1		1	0	3	0	0	0	0	0	0	0	0	1	0	0	0	0	1	0		0	0
337	1	1	1	44	1	5	0	0	1	2	2	1	2	3	1	1	0	0	0	0	1					0	0	2	0	0	0	0	0	0	0	0	0	0	0	0	0	0	0		0	0
338	1	1	1	41	1	8	0	0	1	2	2	1	2	2	1	1	0	0	0	0	1					0	0	2	0	0	0	0	0	0	0	0	0	0	0	0	0	0	0		0	0
339	1	1	2	69	2	2	1	1	1	1	2	1	1	3	0											0	0	2	0	0	0	0	0	0	0	0	0	0	0	1	1	0	1	2	1	0		2	0
340	1	1	2	61	2	2	1	1	1	2	2	1	1	3	1	0	0	1	0	0			3			0	0	1	1	1	0	0	0	1	0	1	0	0	0	1	0	0	1	2	1	0		38	0
341	1	1	2	21	1	7	1	1	1	1	2	1	2	1	1	1	0	0	0	0	3					0	0	2	0	0	0	0	0	0	0	0	0	0	0	0	0	0	0		0	0
342	1	1	1	19	1	5	1	1	1	1	2	1	1	3	0											1	0	1	0	1	0	0	1	0	1	0	1	0	0	0	0	0	0		0	0
343	1	1	2	41	1	8	1	1	1	1	2	1	1	3	0											1	0	1	0	0	0	0	0	0	0	0	1	0	0	0	0	0	0		0	0
344	1	1	1	32	1	7	1	1	1	1	2	1	1	2	0											0	0	3	0	1	0	0	0	0	0	0	0	0	0	0	0	0	0		0	0
345	1	1	2	72	2	1	1	1	1	1	1	1	1	2	0											0	0	3	1	1	0	0	1	1	0	1	0	0	0	1	1	0	1	2	1	1	21	12	0
346	1	2	2	80	2	2	1	1	1	1	2	1	1	3	0											0	0	3	0	1	0	0	0	0	0	1	1	0	0	1	1	0	1	1	1	1	21	52	1
347	1	2	1	42	1	5	1	0	1	1	2	1	1	3	0											0	0	1	0	0	0	0	0	0	0	0	0	0	0	0	0	0	0		0	0
348	1	2	2	32	1	7	1	1	1	1	2	1	1	1	1	1	0	0	0	0	3					0	0	3	0	0	0	0	1	0	0	0	0	0	0	0	0	0	0		0	0
349	1	2	1	91	2	2	1	1	1	1	2	1	2	3	0											0	0	3	0	0	0	0	1	1	0	1	1	0	0	0	0	0	1	1	1	1	22	57	1
350	1	2	2	62	2	7	1	1	1	1	2	1	1	2	1	0	0	0	1	0				1		1	0	3	0	1	1	1	0	1	0	0	1	0	0	1	0	0	1	2	1	0		44	0
351	1	2	2	51	1	5	1	1	1	1	2	1	1	3	0											0	0	1	0	0	0	0	0	0	0	0	1	0	0	0	0	0	0		0	0
352	1	2	2	70	2	5	1	1	1	1	2	1	1	2	1	0	0	0	1	0				1		0	0	3	0	0	0	0	0	0	0	0	0	0	0	1	0	0	1	1	1	1	48	18	1
353	1	2	1	56	1	5	0	0	1	3	2	1	3	2	1	1	0	0	0	0	1					0	0	3	0	0	0	0	0	0	0	0	0	0	0	1	0	0	1	2	1	0		61	0
354	1	1	2	63	2	5	1	0	1	1	2	1	1	2	1	1	0	0	1	0	1			1		1	0	1	0	0	0	0	0	0	0	1	1	1	0	1	1	0	1	2	1	0		46	0
355	1	1	1	85	2	8	1	1	1	1	1	1	1	2	1	0	0	0	1	0				1		0	0	3	0	1	0	0	0	0	0	1	0	0	0	0	1	0	1	5	1	1	15	72	1
356	1	1	1	22	1	5	1	1	1	1	2	1	1	2	0											0	0	3	0	0	0	0	0	0	0	0	0	0	0	0	0	0	0		0	0
357	1	2	2	85	2	5	1	1	1	1	2	1	1	2	0											0	0	3	0	0	0	0	0	0	0	0	0	0	0	0	0	0	1	1	1	1	21	62	1
358	1	1	2	40	1	2	1	1	1	1	2	1	1	2	0											0	0	3	0	0	0	0	0	0	0	0	0	0	0	0	0	0	0		0	0
359	1	1	2	67	2	5	0	0	1	1	2	1	1	1	1	0	0	0	1	0				3		0	0	1	0	0	0	0	0	0	0	0	0	0	0	1	0	0	1	1	1	1	20	99	1
360	1	1	2	41	1	5	0	0	1	1	1	1	2	3	0											1	0	1	1	1	0	0	0	1	0	0	1	0	0	0	0	1	0		0	0
361	1	2	2	53	1	2	1	1	1	1	2	1	1	2	0											0	0	3	1	1	0	0	0	0	0	0	0	0	0	1	0	0	1	2	1	0		15	0
362	1	1	2	72	2	8	1	1	1	1	2	1	1	2	0											0	0	3	0	0	0	0	0	0	0	0	0	0	0	1	0	0	1	1	1	1	21	46	1
363	1	1	1	57	1	8	1	0	1	1	2	1	1	2	1	1	0	0	0	0	1					1	0	3	1	1	1	0	1	1	0	0	1	0	0	0	1	0	0		0	0
364	2	2	1	55	1	3	1	1	1	1	2	1	1	2	1	1	0	0	0	0	0					1	0	2	0	0	0	0	0	0	1	0	0	0	0	0	0	0	0		0	0
365	2	2	1	60	2	8	1	1	1	1	2	1	1	3	0											0	0	2	0	0	0	0	0	0	0	0	0	0	0	0	0	0	1	2	1	0		66	0
366	2	2	2	75	2	7	1	1	1	1	2	1	1	2	1	0	0	0	1	0				0		0	0	1	0	0	0	0	0	0	0	0	0	0	0	1	0	0	1	1	1	1	17	73	1
367	2	2	2	59	1	5	1	1	1	1	2	1	1	3	0											0	0	3	0	1	0	0	0	1	0	0	0	1	0	1	1	0	1	2	1	0		60	0
368	2	2	2	60	2	8	1	0	1	1	2	1	1	3	0											0	0	2	0	0	0	0	0	0	0	0	0	1	0	0	0	0	1	2	1	0		62	0
369	2	2	2	35	1	8	1	1	1	1	2	1	1	1	1	1	0	0	0	0	1					0	0	3	0	0	0	0	0	0	0	0	0	0	0	0	0	0	0		0	0
370	2	2	2	50	1	5	1	1	1	1	2	1	1	2	0											1	0	1	0	1	0	0	1	0	1	0	1	1	0	0	0	0	0		0	0
371	2	2	2	74	2	1	1	1	1	1	2	1	1	2	1	0	1	0	0	0		0				0	0	2	0	0	0	0	0	0	1	0	0	0	0	1	0	1	1	1	1	1	21	75	1
372	2	2	2	31	1	5	1	1	1	1	2	1	1	1	1	1	0	0	0	0	1					0	0	1	0	1	0	0	0	1	0	0	0	1	0	0	0	1	0		0	0
373	2	2	2	48	1	7	1	1	1	1	2	1	2	3	0											0	0	2	0	0	0	0	0	0	0	0	0	0	0	0	0	1	1	2	1	0		28	0
374	2	2	2	46	1	5	1	1	1	1	2	1	1	3	0											1	0	3	0	0	0	0	0	0	0	0	1	0	0	1	0	0	0		0	0
375	2	2	1	30	1	8	1	1	1	1	2	1	1	2	1	0	0	0	1	0				0		0	0	1	0	1	0	0	0	0	0	0	0	0	0	0	0	0	1	2	1	0		48	0
376	2	2	2	50	1	2	1	1	1	1	2	1	1	2	0											0	0	2	0	0	0	0	0	0	0	0	0	0	0	0	0	0	0		0	0
377	2	2	2	38	1	5	1	1	1	1	2	1	1	2	1	0	1	0	0	0		0				0	0	2	0	1	0	0	0	0	0	0	0	0	0	0	1	0	0		0	0
378	2	2	1	83	2	5	1	1	1	2	2	1	2	2	0											0	0	3	0	0	0	0	0	0	0	0	0	0	0	1	0	0	1	1	1	1	21	80	1
379	2	2	2	41	1	5	1	1	1	1	2	1	1	3	0											0	0	2	0	1	0	0	0	0	1	0	1	0	0	1	0	0	1	2	1	0		21	0
380	2	2	2	56	1	8	1	1	1	1	2	1	1	2	0											1	0	2	0	1	0	0	0	0	0	0	1	0	0	0	0	0	1	2	1	0		54	0
381	2	2	1	46	1	4	1	1	1	1	1	1	1	3	0											0	0	1	0	0	0	0	0	0	0	0	0	0	0	0	0	0	0		0	0
382	2	2	1	42	1	5	0		1	1	2	1	1	2	1	0	0	0	1	0				0		1	0	1	0	0	0	0	0	0	0	0	1	0	0	0	0	0	0		0	0
383	2	2	1	44	1	5	0		1	1	2	1	1	3	0											0	0	2	0	1	0	0	0	0	0	1	1	0	0	0	0	0	0		0	0
384	2	2	1	75	2	4	1	1	1	1	2	1	1	3	0											1	0	3	0	1	0	0	0	1	0	1	0	1	0	1	1	0	1	1	1	1	21	70	1
385	2	2	2	27	1	7	1	1	1	1	2	1	1	2	0											1	0	2	1	1	0	0	0	1	0	0	0	1	1	0	0	0	0		0	0
386	2	2	2	56	1	6	1	1	1	2	2	1	1	2	0											0	0	1	0	1	0	0	0	0	0	0	0	0	0	1	0	0	0		0	0
387	2	2	1	91	2	5	1	1	1	1	2	1	1	3	1	0	1	0	0	0		0				0	0	3	0	0	0	0	0	0	0	0	0	0	0	1	1	0	1	1	1	1	22	108	1
388	2	2	1	35	1	2	1	1	1	1	2	1	1	3	1	1	0	0	0	0	Ainda não tem o resultado					1	1	2	1	0	0	0	1	1	0	0	1	0	0	0	0	0	0		0	0
389	2	2	1	61	2	8	1	1	1	1	1	1	1	2	1	1	0	0	1	0	0			0		0	0	1	0	0	0	0	0	0	0	0	0	0	0	1	0	0	1	2	1	0		63	0
390	2	2	2	54	1	4	1	1	1	1	2	1	1	1	1	0	0	0	1	0				1		1	0	3	0	1	0	0	0	1	1	0	1	1	1	0	1	0	1	2	1	0		52	0
391	2	2	1	27	1	7	1	1	1	1	2	1	1	1	0											0	0	3	0	0	0	0	0	0	0	0	0	0	0	0	0	0	1	1	1	0		5	0
392	2	2	1	53	1	7	1	1	1	2	2	1	2	1	1	0	0	0	1	0				1		0	0	3	0	0	0	0	0	0	1	0	0	0	0	0	0	0	0		0	0
393	2	2	1	63	2	8	1	1	1	1	2	1	1	2	1	1	0	0	0	0	0					0	0	2	0	1	0	0	0	0	0	0	0	0	0	0	0	0	1	2	1	0		69	0
394	2	2	1	21	1	5	1	1	1	1	2	1	1	3	0											0	0	1	0	0	0	0	0	0	0	0	0	0	0	0	0	0	0		0	0
395	2	2	2	55	1	2	1	1	1	1	1	1	1	1	1	1	0	0	0	0	1					1	0	1	1	1	1	1	1	0	1	0	1	1	0	1	0	0	1	2	1	0		27	0
396	2	2	2	60	2	8	1	1	1	2	2	1	2	3	1	0	0	0	1	0				0		1	0	1	0	0	0	0	0	0	0	0	0	0	0	0	1	0	1	2	1	0		61	0
397	2	2	2	37	1	5	1	1	1	1	2	1	1	3	0											0	0	2	0	0	0	0	0	0	0	0	0	0	0	0	0	0	0		0	0
398	2	2	2	56	1	6	0		1	1	2	1	1	2	0											1	0	1	0	0	0	0	1	0	1	1	0	0	0	1	0	0	1	3	1	0		0	0
399	2	2	1	64	2	5	1	1	1	1	2	1	1	3	0											0	0	3	0	0	0	0	0	0	0	0	0	0	0	0	1	0	1	2	1	0		69	0
400	2	2	2	53	1	5	1	1	1	1	2	1	1	2	1	1	0	0	0	0	Ainda não tem o resultado					1	0	2	0	0	0	0	0	1	0	0	1	0	0	1	1	0	1	3	1	0		11	0
401	2	2	2	48	1	7	1	1	1	2	2	1	2	1	1	0	0	0	1	0				1		0	0	1	0	0	0	0	0	0	0	0	0	0	0	0	0	0	0		0	0
402	2	2	1	24	1	2	1	1	1	1	1	1	1	3	0											0	0	2	0	0	0	0	0	0	0	0	0	0	0	0	0	0	0		0	0
403	2	2	2	45	1	5	1	1	1	1	2	1	1	2	1	1	1	0	0	0	0	0				0	0	1	0	0	0	0	0	0	1	0	0	0	0	0	0	0	0		0	0
404	2	2	1	34	1	4	1	1	1	2	1	0	2	3	0											1	0	2	1	1	0	0	0	0	1	0	1	0	0	0	0	0	0		0	0
405	2	2	2	73	2	5	1	1	1	1	2	1	1	2	0											0	0	2	0	0	0	0	0	0	0	0	0	0	0	0	0	0	1	1	1	1	21	70	1
406	2	2	1	51	1	8	1	1	1	1	1	1	1	3	0											0	0	3	0	0	0	0	0	0	0	0	0	0	0	0	0	0	0		0	0
407	2	2	1	47	1	8	1	1	1	1	2	1	1	1	1	1	0	0	1	0	1			0		0	0	1	0	0	0	0	0	0	0	0	0	0	0	0	0	0	1	3	1	0		4	0
408	2	2	2	54	1	4	1	1	1	2	1	1	1	3	0											1	0	2	0	1	0	0	1	1	0	0	1	0	0	1	0	0	1	3	1	0		18	0
409	2	2	2	82	2	8	1	1	1	2	1	1	2	2	0	0	0	0	1	0				0		0	0	3	0	0	0	0	0	0	0	0	0	0	0	0	0	0	1	1	1	1	21	77	1
410	2	2	1	71	2	7	1	1	1	1	1	1	1	2	0											0	0	3	0	0	0	0	0	0	0	0	0	0	0	0	0	0	1	1	1	1	21	69	1
411	2	2	2	56	1	5	1	1	1	2	1	1	2	1	1	0	0	0	1	0				1		0	0	1	0	0	0	0	0	0	0	0	0	0	0	1	1	0	0		0	0
412	2	2	2	75	2	2	1	1	1	1	1	1	1	3	0											0	0	1	0	0	0	0	0	0	0	0	0	0	0	1	1	0	1	1	1	1	21	74	1
413	2	2	1	67	2	3	1	1	1	1	2	1	1	2	0											0	0	3	0	0	0	0	0	1	0	0	0	0	0	1	1	0	1	1	1	1	23	55	1
414	2	2	2	61	2	4	1	1	1	1	2	1	1	3	0											0	0	1	0	0	0	0	0	0	1	0	0	1	0	1	0	0	1	2	1	0		63	0
415	2	2	2	39	1	7	1	1	1	1	2	1	1	1	1	1	1	0	0	0	0	1				1	1	1	0	1	1	0	1	1	1	1	1	1	0	0	0	0	1	1	1	1	17	138	1
416	2	2	2	40	1	5	1	1	1	2	1	1	2	2	1	0	0	1	0	0			0			1	0	1	0	1	0	0	0	0	0	0	1	0	0	1	0	0	0		0	0
417	2	2	1	63	2	5	1	1	1	1	2	1	1	3	0											0	0	1	0	0	0	0	0	0	0	0	1	0	0	0	0	0	1	2	1	0		40	0
418	2	2	2	47	1	5	1	1	1	1	2	1	1	3	1	0	0	0	1	0				0		1	0	1	0	1	0	0	1	1	1	1	1	0	0	1	0	0	0		0	0
419	2	2	1	65	2	1	1	1	1	1	2	1	1	3	0											1	0	1	0	0	0	0	0	1	0	1	0	1	0	0	0	0	1	1	1	1	33	41	1
420	2	2	1	71	2	4	1	1	1	2	2	1	2	2	0											0	0	3	0	0	0	0	0	0	0	0	0	0	0	1	1	0	1	1	1	1	21	70	1
421	2	2	2	64	2	8	1	1	1	1	2	1	1	2	1	1	0	0	0	0	0					0	0	1	0	0	0	0	0	0	0	0	0	0	0	1	0	0	1	2	1	0		78	0
422	2	2	1	65	2	5	1	1	1	1	2	1	1	2	1	1	0	0	1	0	0			0		0	0	2	0	0	0	0	0	0	0	0	0	0	0	1	1	0	1	1	1	1	33	41	1
423	2	2	2	69	2	2	1	1	1	1	1	1	2	1	1	1	0	0	1	0	0			1		0	0	2	0	1	0	0	1	0	0	0	1	0	0	0	0	0	1	1	1	1	21	64	1
424	2	2	1	60	2	2	1	1	1	1	2	1	1	3	0											0	0	2	0	0	0	0	0	0	0	0	1	0	0	0	0	0	0		0	0
425	2	2	2	61	2	5	1	1	1	1	2	1	1	1	1	1	0	0	0	0	1					0	0	1	0	0	0	0	0	0	0	0	0	0	0	1	0	0	1	2	1	1	62	7	0
426	2	2	2	74	2	9	1	1	1	1	2	1	1	2	0											0	0	2	0	0	0	0	0	0	0	0	0	0	0	1	0	1	1	1	1	1	21	74	1
427	2	2	2	55	1	5	1	1	1	2	2	1	2	2	0											0	0	3	0	0	0	0	0	0	0	0	1	0	0	0	0	0	0		0	0
428	2	2	1	42	1	2	1	1	1	1	2	1	1	2	0											0	0	1	0	1	0	0	0	0	0	0	0	0	0	0	0	0	0		0	0
429	2	2	2	30	1	8	1	1	1	1	1	1	1	2	1	0	0	0	1	0				0		0	0	2	0	0	0	0	0	0	0	0	0	0	0	0	0	0	1	2	1	0		19	0
430	2	2	2	62	2	8	1	1	1	1	1	1	1	1	1	1	0	0	1	0	1			1		1	1	1	1	1	1	1	1	1	1	1	1	0	0	1	0	0	1	2	1	0		69	0
431	2	2	1	30	1	5	1	1	1	2	1	1	2	2	1	1	0	0	0	0	0					0	0	1	0	1	0	0	0	0	0	0	0	0	0	0	0	0	1	3	1	0		7	0
432	2	2	1	56	1	2	1	1	1	1	2	1	1	3	0											0	0	1	0	0	0	0	0	0	0	0	0	0	0	1	0	0	1	2	1	0		54	0
433	2	2	2	66	2	3	1	1	1	1	2	1	1	3	0											0	0	2	0	1	0	0	0	1	0	1	0	0	0	1	0	0	1	1	1	1	33	42	1
434	2	2	1	64	2	5	0		1	1	1	1	1	2	0											0	0	2	0	0	0	0	0	0	0	0	0	0	0	0	0	0	1	2	1	0		71	0
435	2	2	2	46	1	5	1	1	1	1	2	1	1	1	1	0	0	0	1	0				1		0	0	1	0	0	0	0	0	0	0	0	0	0	0	0	0	0	0		0	0
436	2	2	2	47	1	2	1	1	1	1	2	1	1	2	0											0	0	1	0	0	0	0	0	0	0	0	0	0	0	0	0	0	1	2	1	0		32	0
437	2	2	2	46	1	5	1	1	1	1	1	1	1	2	1	1	0	0	1	0	0			0		0	0	2	0	0	0	0	0	0	0	0	0	0	0	1	0	0	1	2	1	0		23	0
438	2	2	1	69	2	7	1	1	1	2	1	1	2	2	1	1	0	0	0	0	0					0	0	2	0	0	0	0	0	0	0	0	0	0	0	1	0	0	1	1	1	1	30	31	1
439	2	2	2	66	2	7	1	1	1	1	2	1	1	2	0											0	0	2	0	0	0	0	0	0	0	0	0	0	0	1	0	0	0		0	0
440	2	2	2	39	1	5	1	1	1	2	1	1	2	1	1	1	0	0	0	0	1					0	0	1	0	0	1	1	0	0	0	0	0	0	0	0	0	0	1	2	1	0		8	0
441	2	2	1	47	1	5	1	1	1	1	2	1	1	3	0											0	0	2	0	0	0	0	0	0	0	0	1	0	0	0	0	0	0		0	0
442	2	2	2	56	1	2	1	1	1	1	2	1	1	1	0											0	0	1	0	0	0	0	0	0	0	0	0	0	0	0	0	0	1	3	1	0		13	0
443	2	2	2	44	1	5	1	1	1	1	1	1	1	1	1	1	0	0	1	0	1			1		0	0	1	0	0	0	0	0	0	0	0	0	0	0	1	0	1	1	2	1	0		5	0
444	2	2	1	60	2	8	1	1	1	2	1	1	1	3	1	1	0	0	0	0	0					0	0	2	0	0	0	0	0	0	0	0	0	0	0	0	0	0	1	2	1	0		50	0
445	2	2	2	54	1	5	1	1	1	1	2	1	1	2	0											1	0	1	0	1	0	0	1	1	0	0	1	0	0	1	0	0	0		0	0
446	2	2	2	42	1	6	1	1	1	1	2	1	1	2	1	1	0	0	0	0	0					1	0	2	1	1	0	0	1	1	0	0	1	0	0	1	0	0	0		0	0
447	2	2	1	66	2	7	1	1	1	1	1	1	1	2	0											0	0	2	0	0	0	0	0	0	0	0	0	0	0	0	0	0	1	1	1	1	51	55	1
448	2	2	1	59	1	5	0		1	1	1	1	1	3	0											1	0	2	0	0	0	0	0	0	0	0	1	0	0	1	0	0	0		0	0
449	2	2	2	52	1	3	1	1	1	1	2	1	1	1	1	1	0	0	0	0	1					0	0	1	0	0	0	0	0	1	0	1	0	0	0	1	0	0	1	2	1	0		31	0
450	2	2	1	72	2	1	1	1	1	1	1	1	1	3	0											0	0	1	0	0	0	0	0	0	0	0	0	0	0	0	1	0	1	1	1	1	21	71	1
451	2	2	1	26	1	2	1	0	1	1	2	1	1	1	0											0	0	1	0	0	0	0	0	0	0	0	0	0	0	1	0	0	0		0	0
452	2	2	2	32	1	5	0		1	1	2	1	1	2	1	1	0	0	0	0	0					1	0	1	0	1	0	0	1	0	0	0	0	0	0	0	0	1	0		0	0
453	2	2	2	31	1	7	1	1	1	1	1	1	1	2	1	1	1	0	1	0	0	0		0		1	0	1	0	0	0	0	1	0	0	0	1	0	0	0	0	1	0		0	0
454	2	2	2	46	1	2	1	1	1	1	2	1	1	3	0											1	0	3	0	0	0	0	1	0	1	0	1	0	0	0	0	0	0		0	0
455	2	2	2	50	1	5	1	1	1	1	2	1	1	3	0											1	0	2	1	1	0	0	1	0	1	0	1	0	0	0	0	0	0		0	0
456	2	2	1	69	2	7	1	1	1	2	1	1	1	1	1	1	1	0	1	0	1	1		1		0	1	1	0	0	0	0	0	0	0	0	0	0	0	0	0	0	1	1	1	1	32	50	1
457	2	2	1	36	1	2	1	1	1	1	2	1	1	3	0											1	0	3	1	1	1	1	1	1	1	1	0	0	0	0	0	0	0		0	0
458	2	2	1	63	2	2	1	1	1	1	2	1	1	2	0											0	0	2	0	0	0	0	0	0	0	0	0	0	0	1	1	0	1	2	1	0		62	0
459	2	2	2	66	2	2	0		1	1	2	1	1	2	0											0	0	2	0	0	0	0	0	0	0	0	0	0	0	0	0	0	1	1	1	1	71	6	0
460	2	2	1	43	1	5	1	1	1	1	1	1	1	2	1	0	0	0	1	0				0		0	0	2	0	0	0	0	0	0	0	0	0	0	0	0	0	0	1	2	1	0		49	0
461	2	2	2	73	2	5	1	1	1	1	2	1	1	2	1	0	1	0	0	0		0				0	0	2	0	0	0	0	0	0	0	0	0	0	0	1	1	0	1	1	1	1	21	70	1
462	2	2	1	73	2	5	1	1	1	1	2	1	1	2	0											0	0	2	0	0	0	0	0	0	0	0	1	0	0	1	0	0	1	1	1	1	22	70	1
463	2	2	2	37	1	5	1	1	1	1	2	1	1	1	1	1	0	0	0	0	1					0	0	1	0	0	0	0	0	0	0	1	0	0	0	0	0	0	0		0	0
464	2	2	2	39	1	5	1	1	1	1	2	1	1	1	1	1	0	0	0	0	1					0	0	1	0	0	0	0	1	0	0	0	0	0	0	1	0	0	1	3	1	0		9	0
465	2	2	2	41	1	5	1	1	1	1	1	1	1	2	1	0	0	0	1	0				0		0	0	1	0	0	0	0	0	0	0	0	0	0	0	0	0	0	0		0	0
466	2	2	2	51	1	5	1	1	1	1	2	1	1	3	0											0	0	1	0	0	0	0	0	0	0	0	0	0	0	0	0	0	1	2	1	0		12	0
467	2	2	2	53	1	2	1	1	1	1	2	1	1	3	0											0	0	3	0	0	0	0	1	1	0	0	0	0	0	1	1	0	1	2	1	0		50	0
468	2	2	2	75	2	8	1	1	1	1	2	1	1	2	0											0	0	2	0	0	0	0	0	0	0	0	0	0	0	0	0	0	1	1	1	1	21	74	1
469	2	2	1	56	1	2	1	1	1	1	2	1	1	2	0											0	0	2	0	0	0	0	0	0	0	0	1	0	0	0	0	0	0		0	0
470	2	2	2	65	2	5	1	1	1	1	1	1	1	2	1	1	0	0	0	0	0					0	0	2	0	0	0	0	0	0	0	0	0	0	0	1	0	0	1	1	1	1	33	41	1
471	2	3	1	50	1	3	1	0	1	1	1	1	1	3	0											1	0	1	0	0	0	0	0	0	0	0	0	0	0	0	0	0	0		0	0
472	2	3	2	27	1	7	1	1	1	2	1	1	2	2	1	0	1	0	0	0		0				1	0	2	0	0	0	0	0	0	0	0	0	0	0	0	0	0	1	2	1	1	84	12	0
473	2	3	2	69	2	2	1	1	1	1	2	1	1	2	1	0	1	0	0	0		0				0	0	2	0	0	0	0	1	0	0	0	1	0	0	0	1	0	1	1	1	1	28	58	1
474	2	3	2	54	1	2	1	1	1	1	2	1	1	3	0											0	0	2	1	0	0	0	0	1	0	0	1	1	1	1	1	0	1	2	1	0		29	0
475	2	2	2	70	2	3	1	1	1	1	2	1	1	3	0											1	0	2	0	0	0	0	0	0	0	0	1	0	0	1	1	1	1	1	1	1	28	58	1
476	2	3	2	20	1	5	1	1	1	1	2	1	1	2	0											1	0	1	0	1	0	0	0	0	0	0	0	0	0	0	0	0	0		0	0
477	2	3	2	49	1	2	1	1	1	1	1	1	1	2	1	0	1	0	0	0		0				0	0	2	0	0	0	0	0	0	0	0	0	0	0	0	0	0	0		0	0
478	2	3	2	37	1	5	1	1	1	2	1	1	2	3	0											0	0	3	0	0	0	0	0	0	0	0	0	0	0	0	0	0	0		0	0
479	2	3	2	26	1	8	1	1	1	1	2	1	1	3	0											0	0	2	0	0	0	0	0	0	0	0	0	0	0	0	0	0	0		0	0
480	2	3	1	46	1	4	1	1	1	1	2	1	1	2	0											0	0	2	0	0	0	0	0	0	0	0	0	0	0	0	1	0	1	2	1	0		1	0
481	2	3	1	57	1	5	1	1	1	1	1	1	1	2	1	1	0	0	1	0	0			0		0	0	2	0	0	0	0	0	0	0	0	0	0	0	1	0	0	1	2	1	0		44	0
482	2	3	2	68	2	5	1	1	1	1	2	1	1	2	1	1	0	0	0	0	0					1	0	1	1	0	0	0	1	1	1	0	1	0	0	1	0	1	1	1	1	1	28	62	1
483	2	3	2	42	1	5	1	1	1	2	1	1	2	3	0											1	0	2	0	0	0	0	1	0	0	0	1	0	0	1	0	0	0		0	0
484	2	3	2	42	1	5	1	1	1	1	2	1	1	2	1	1	0	0	0	0	0					0	0	2	0	0	0	0	0	0	0	0	0	0	0	0	0	0	1	2	1	0		5	0
485	2	2	2	63	2	3	1	1	1	1	2	1	1	3	0											0	0	2	0	1	0	0	0	0	0	0	0	0	0	1	1	0	1	2	1	1	71	0	0
486	2	3	1	59	1	7	1	1	1	1	2	1	1	2	1	1	0	0	0	0	0					1	0	2	0	0	0	0	0	0	0	0	1	0	0	0	0	0	1	2	1	0		26	0
487	2	3	2	36	1	5	1	1	1	1	2	1	2	3	0											0	0	3	0	0	0	0	0	0	0	0	0	0	0	0	0	0	1	2	1	0		32	0
488	2	3	1	66	2	3	0		1	1	1	1	1	2	1	0	0	0	1	0				0		0	0	1	0	0	0	0	0	0	0	0	0	0	0	0	0	0	1	2	1	0		65	0
489	2	3	1	65	2	2	1	1	1	1	1	1	1	3	0											0	0	2	0	0	0	0	0	0	0	0	0	0	0	1	0	0	1	1	1	1	33	42	1
490	2	3	2	70	2	3	1	1	1	1	2	1	1	2	1	0	1	0	0	0		0				0	0	1	0	0	0	0	0	0	0	0	0	0	0	1	0	0	1	1	1	1	28	58	1
491	2	3	1	58	1	5	1	1	1	1	2	1	1	2	1	1	0	0	0	0	0					0	0	2	0	0	0	0	0	0	0	0	0	0	0	1	1	0	1	2	1	0		56	0
492	2	2	2	57	1	5	1	1	1	1	2	1	1	1	1	1	0	0	1	0	1			1		0	0	2	0	0	0	0	0	0	0	0	0	0	0	0	0	0	1	3	1	0		3	0
493	2	3	2	69	2	2	1	1	1	1	1	1	1	2	1	0	1	0	0	0		0				1	0	2	0	0	0	0	0	0	0	0	1	0	0	0	0	0	1	1	1	1	28	58	1
494	2	3	2	47	1	8	1	1	1	1	1	1	1	2	1	0	0	0	1	0				0		0	0	2	0	0	0	0	0	1	1	0	0	0	0	1	0	1	1	3	1	0		15	0
495	2	3	2	50	1	5	1	1	1	1	2	1	1	1	1	1	0	0	1	0	0			1		1	0	1	0	0	0	0	0	0	0	0	0	0	0	0	0	0	0		0	0
496	2	3	2	53	1	5	1	1	1	1	2	1	2	3	0											1	0	1	0	0	0	0	0	0	0	0	0	0	0	1	0	0	1	2	1	0		15	0
497	2	3	1	67	2	8	0		1	1	2	1	1	3	0											1	0	2	0	0	0	0	0	0	0	0	0	0	0	1	1	0	1	1	1	1	28	49	1
498	2	3	1	70	2	9	1	1	1	1	2	1	1	2	1	1	0	0	0	0	0					0	0	2	0	0	0	0	0	0	0	0	0	0	0	0	0	0	1	1	1	1	21	71	1
499	2	3	2	73	2	5	1	1	1	1	2	1	1	3	0											0	0	2	0	0	0	0	1	0	0	0	0	0	0	0	0	0	1	1	1	1	21	77	1
500	2	3	2	37	1	5	1	1	1	1	2	1	2	1	1	1	0	0	0	0	1					0	0	1	0	0	0	0	0	0	0	0	0	0	0	0	0	0	0		0	0
501	2	3	2	58	1	8	1	1	1	1	2	1	1	2	1	1	0	0	0	0	0					1	0	2	0	0	0	0	0	0	0	0	0	0	0	1	0	0	1	2	1	0		58	0
502	2	3	2	55	1	2	1	1	1	1	2	1	1	2	0											1	0	2	0	1	0	0	0	0	0	0	0	0	0	0	0	0	1	2	1	0		1	0
503	2	3	1	48	1	7	1	1	1	1	1	1	1	2	1	1	0	0	0	0	0					0	0	2	0	1	0	0	0	0	0	0	0	0	0	0	1	0	1	1	1	0		43	0
504	2	3	2	35	1	4	1	1	1	1	2	1	1	1	1	1	0	0	0	0	1					1	0	1	0	0	0	0	1	0	1	0	1	0	0	0	0	0	0		0	0
505	2	3	2	44	1	2	1	1	1	1	1	1	1	3	0											0	0	2	0	0	0	0	0	0	0	0	0	0	0	0	0	0	0		0	0
506	2	3	2	48	1	5	1	1	1	1	1	1	2	2	1	1	1	0	1	0	0	0		0		0	0	2	0	0	0	0	0	0	0	0	1	0	0	1	0	1	1	2	1	0		33	0
507	2	3	1	39	1	4	1	1	1	1	1	1	1	3	0											0	0	2	0	0	0	0	0	0	0	0	1	0	0	0	0	0	0		0	0
508	2	3	2	62	2	5	1	1	1	1	2	1	1	2	1	1	1	0	0	0	0	0				0	0	1	0	1	0	0	0	0	0	0	0	0	0	1	0	0	1	1	1	1	21	141	1
509	2	3	2	61	2	7	1	1	1	1	2	1	1	2	0											0	0	2	0	0	0	0	0	0	0	0	0	0	0	0	0	0	1	2	1	0		65	0
510	2	3	1	62	2	5	1	1	1	1	2	1	1	3	1	0	0	0	1	0				Ainda não tem o resultado		1	0	2	0	0	0	0	0	0	0	0	1	0	0	0	0	0	1	2	1	0		64	0
511	2	3	1	36	1	8	1	1	1	1	1	1	1	3	0											0	0	3	0	0	0	0	0	0	0	0	0	0	0	0	0	0	0		0	0
512	2	3	2	60	2	5	1	1	1	2	1	1	2	3	0											0	0	1	0	0	0	0	0	0	0	0	0	0	0	1	0	0	1	2	1	0		67	0
513	2	3	2	54	1	2	1	1	1	1	1	1	1	3	0											1	0	1	1	0	0	0	1	0	0	0	1	0	0	0	0	0	0		0	0
514	2	3	1	57	1	4	1	1	1	1	2	1	1	2	0											1	0	2	0	1	0	0	0	0	0	0	0	0	0	1	0	0	1	2	1	0		49	0
515	2	3	1	43	1	3	1	1	1	1	2	1	1	3	0											0	0	2	0	0	0	0	0	0	0	0	0	1	0	0	0	0	0		0	0
516	2	3	2	32	1	7	1	1	1	1	2	1	2	3	0											0	0	3	0	0	0	0	0	0	0	0	0	0	0	0	0	0	0		0	0
517	2	3	2	81	2	1	1	1	1	1	2	1	1	2	0											0	0	2	0	0	0	0	0	0	0	0	0	0	0	1	0	0	1	1	1	1	27	36	1
518	2	3	1	65	2	3	1	1	1	1	1	1	2	3	0											0	0	2	0	0	0	0	0	0	0	0	0	0	0	0	0	0	1	1	1	1	49	20	1
519	2	3	1	63	2	7	1	1	1	2	2	1	1	1	0											0	0	1	0	0	0	0	0	0	0	0	0	0	0	1	0	0	1	2	1	0		78	0
520	2	3	1	66	2	8	1	1	1	1	2	1	1	2	1	0	1	0	0	0		0				1	0	2	0	1	0	1	1	0	0	0	1	0	0	1	1	0	1	1	1	1	34	43	1
521	2	3	2	31	1	8	1	1	1	1	2	1	1	3	1	0	1	0	0	0		0				0	0	3	0	0	0	0	0	0	0	0	0	0	0	0	0	0	0		0	0
522	2	3	2	59	1	5	1	1	1	1	2	1	1	3	0											0	0	2	0	1	0	0	1	0	1	0	0	0	0	1	0	0	1	2	1	0		54	0
523	2	1	2	84	2	5	1	1	1	1	1	1	1	2	0											0	0	2	0	0	0	0	0	0	0	0	0	0	0	0	1	0	1	1	1	1	48	43	1
524	2	1	2	47	1	4	1	1	1	1	2	1	1	3	0											1	0	2	0	1	0	0	0	0	0	0	1	0	0	1	0	0	1	3	1	0		6	0
525	2	3	2	29	1	7	1	1	1	1	2	1	1	3	0											1	0	3	0	1	0	0	1	0	1	0	1	0	0	0	0	1	0		0	0
526	2	1	2	52	1	4	1	1	1	2	1	1	1	2	0											0	0	1	0	1	0	0	0	0	0	0	0	0	0	0	0	0	1	2	1	0		12	0
527	2	1	2	34	1	5	1	0	1	1	1	1	1	2	0											0	0	2	0	0	0	0	0	0	0	0	0	0	0	0	0	0	0		0	0
528	2	3	1	23	1	4	1	1	1	1	2	1	2	2	0											0	0	2	0	0	0	0	0	0	0	0	0	0	0	0	0	0	0		0	0
529	2	1	2	44	1	6	1	1	1	1	1	1	1	3	0											0	0	1	0	1	0	0	0	0	0	0	1	0	0	1	0	0	0		0	0
530	2	1	2	68	2	5	1	1	1	1	1	1	1	2	0											0	0	2	0	0	0	0	0	0	0	0	0	0	0	1	1	0	1	1	1	1	31	52	1
531	2	1	2	64	2	6	1	1	1	1	2	1	1	2	0											1	0	2	0	1	0	0	0	0	0	0	1	0	0	0	0	0	1	2	1	0		34	0
532	2	3	1	65	2	8	1	1	1	1	2	1	1	2	0											1	0	2	0	0	0	0	1	0	0	0	1	0	0	1	0	0	1	1	1	1	36	48	1
533	2	1	2	70	2	5	1	1	1	1	1	1	1	1	1	0	1	0	0	0		0				0	0	2	0	1	0	0	0	0	0	0	1	0	0	1	0	0	1	1	1	1	33	52	1
534	2	3	1	56	1	2	1	1	1	1	2	1	1	2	0											0	0	1	0	0	0	0	0	0	0	0	0	0	0	1	0	0	1	2	1	0		50	0
535	2	3	2	56	1	5	1	1	1	1	1	1	1	3	0											0	0	2	0	0	0	0	0	0	0	0	0	0	0	1	0	0	1	2	1	0		22	0
536	2	1	1	19	1	5	0		1	1	1	1	1	2	0											0	0	2	0	0	0	0	0	0	0	0	0	0	0	0	0	0	0		0	0
537	2	1	1	45	1	5	1	1	1	1	2	1	1	2	1	1	1	0	0	0	0	0				0	0	2	1	1	0	0	0	0	0	0	0	0	0	1	0	0	1	2	1	0		26	0
538	2	3	2	41	1	5	1	1	1	1	2	1	1	2	1	1	0	0	0	0	0					1	0	2	0	1	0	0	0	1	0	0	1	0	0	0	0	0	1	3	1	0		3	0
539	2	3	2	73	2	5	1	1	1	1	1	1	1	2	1	1	0	0	0	0	0					1	0	2	0	1	0	0	0	0	0	0	1	0	0	1	1	0	1	1	1	1	21	72	1
540	2	1	2	63	2	6	1	1	1	1	1	1	1	2	0											0	0	2	0	0	0	0	0	0	0	0	0	0	0	0	0	0	1	2	1	1	71	0	0
541	2	1	1	68	2	9	1	1	1	1	2	1	1	2	0											0	0	2	0	0	0	0	0	0	0	0	0	0	0	0	0	0	1	1	1	1	22	97	1
542	2	3	2	63	2	2	1	1	1	1	1	1	1	2	1	0	0	1	0	0			0			1	0	1	0	0	0	0	0	0	0	0	1	0	0	0	0	0	1	2	1	0		75	0
543	2	3	2	38	1	5	1	1	1	1	2	1	2	2	1	1	0	0	0	0	0					1	0	2	0	1	0	0	0	0	1	0	0	0	0	1	0	0	0		0	0
544	2	1	2	53	1	5	1	1	1	1	2	1	1	3	0											0	0	2	0	1	0	0	0	1	0	0	0	0	0	0	0	0	0		0	0
545	2	3	2	40	1	5	1	1	1	1	2	1	1	2	0											1	0	2	0	0	0	0	1	0	1	0	1	0	0	0	0	0	0		0	0
546	2	3	1	54	1	2	1	1	1	1	1	1	1	3	0											0	0	3	0	0	0	0	0	0	0	0	0	0	0	0	0	0	0		0	0
547	2	1	2	55	1	7	1	1	1	1	1	1	1	2	1	0	0	0	1	0				0		0	0	2	0	0	0	0	1	1	0	0	0	0	0	0	0	1	1	2	1	0		22	0
548	2	3	1	42	1	5	1	1	1	1	2	1	1	1	1	1	0	0	0	0	1					1	0	3	0	0	0	0	1	0	0	0	0	0	0	0	0	0	0		0	0
549	2	1	2	48	1	8	1	1	1	1	1	1	1	1	1	1	0	0	0	0	1					0	0	2	0	0	0	0	0	0	0	0	0	0	0	0	0	0	1	3	1	0		9	0
550	2	1	2	64	2	3	1	1	1	1	2	1	1	2	1	0	1	0	0	0		0				0	0	2	0	0	0	0	0	1	0	0	0	0	0	1	0	0	1	2	1	0		72	0
551	2	3	1	38	1	3	1	1	1	1	2	1	1	3	0											1	0	1	0	0	0	0	1	0	1	0	1	0	0	0	0	0	0		0	0
552	2	1	2	64	2	5	1	1	1	1	2	1	1	2	0											0	0	1	0	0	0	0	0	0	0	0	0	0	0	0	0	0	1	2	1	0		73	0
553	2	1	1	60	2	8	1	1	1	1	1	1	1	2	1	0	0	0	1	0				0		1	0	2	1	0	0	0	0	1	0	0	1	0	0	0	1	0	1	2	1	0		64	0
554	2	1	2	58	1	3	1	1	1	1	1	1	1	2	0											0	0	2	0	0	0	0	0	0	0	0	0	0	0	0	0	0	1	2	1	0		22	0
555	2	1	2	23	1	7	1	1	1	1	2	1	1	3	0											0	0	2	0	0	0	0	0	0	0	0	1	0	0	0	0	0	0		0	0
556	2	3	2	63	2	5	1	1	1	1	1	1	1	3	0											0	0	1	0	0	0	0	0	0	0	0	0	0	0	1	0	0	1	1	1	1	39	38	1
557	2	1	2	26	1	5	1	1	1	1	1	1	1	2	0											0	0	2	0	0	0	0	0	0	0	0	0	0	0	0	0	0	0		0	0
558	2	1	2	41	1	7	1	0	1	1	2	1	2	2	0											1	0	2	0	1	0	0	1	0	1	0	0	0	0	0	0	0	0		0	0
559	2	3	2	57	1	5	1	1	1	1	1	1	1	3	0											0	0	2	0	0	0	0	0	0	0	0	0	0	0	0	0	0	0		0	0
560	2	1	2	74	2	3	1	0	1	1	1	1	1	2	0											0	0	2	0	0	0	0	0	0	0	0	0	0	0	1	0	0	1	2	1	1	0	0	0
561	2	1	2	52	1	8	1	1	1	1	2	1	1	2	0											1	0	1	0	0	0	0	1	0	0	0	1	0	0	0	0	1	1	2	1	0		13	0
562	2	3	2	58	1	8	1	1	1	1	2	1	1	1	1	1	0	0	0	0	1					0	1	1	0	0	0	0	1	0	1	1	0	0	0	0	0	0	1	2	1	0		48	0
563	2	1	2	22	1	7	1	1	1	1	2	1	1	3	0											1	0	2	0	0	0	0	1	0	1	0	1	0	0	0	0	0	1	2	1	0		57	0
564	2	3	2	49	1	8	1	1	1	1	1	1	1	2	1	0	0	0	1	0				0		0	0	2	0	0	0	0	0	0	0	0	0	0	0	0	0	0	0		0	0
565	2	3	2	45	1	8	1	1	1	1	2	1	1	2	1	1	0	0	0	0	0					1	0	2	1	1	0	0	1	1	1	1	0	0	0	1	0	0	0		0	0
566	2	1	1	65	2	5	0		1	1	2	1	1	1	1	1	0	0	0	0	1					0	0	1	0	0	0	0	0	0	0	0	0	0	0	0	0	0	1	2	1	0		84	0
567	2	3	2	67	2	2	1	1	1	1	1	1	1	2	1	0	0	0	1	0				0		1	0	2	0	0	0	0	0	0	0	0	0	0	0	1	0	0	1	1	1	1	34	45	1
568	2	1	2	57	1	2	1	1	1	1	1	1	1	2	0											0	0	2	0	0	0	0	1	1	1	1	0	0	0	1	0	0	0		0	0
569	2	3	2	73	2	2	1	1	1	1	2	1	1	3	0											0	0	2	0	0	0	0	0	0	0	0	0	0	0	1	0	0	1	1	1	1	21	73	1
570	2	1	2	58	1	5	1	1	1	1	2	1	1	2	0											0	0	1	0	0	0	0	0	0	0	0	0	0	0	0	0	0	1	3	1	0		8	0
571	2	3	2	36	1	2	1	1	1	2	1	1	1	3	0											0	0	3	0	0	0	0	0	0	0	0	0	0	0	0	0	0	0		0	0
572	2	3	2	30	1	7	1	1	1	1	1	1	1	2	1	1	0	0	1	0	0			0		0	0	2	0	0	0	0	0	0	0	0	0	0	0	0	0	0	1	1	1	1	21	107	1
573	2	3	2	27	1	2	1	1	1	1	2	1	2	3	0											1	0	3	0	0	0	0	1	1	1	0	1	1	0	0	0	0	0		0	0
574	2	3	2	75	2	4	1	1	1	1	2	1	1	3	0											1	0	2	1	0	0	0	0	0	0	0	0	0	0	1	1	0	1	1	1	1	21	72	1
575	2	1	2	60	2	8	1	0	1	1	2	1	1	2	0											0	0	2	0	0	0	0	0	0	0	0	0	0	0	0	0	0	1	2	1	0		30	0
576	2	3	1	76	2	3	1	1	1	1	2	1	1	2	1	0	1	0	0	0		0				0	0	2	0	0	0	0	1	0	0	0	0	0	0	1	0	0	1	1	1	1	8	61	1
577	2	3	2	59	1	4	1	1	1	1	2	1	1	3	0											0	0	1	0	0	0	0	0	0	0	0	0	0	0	1	0	0	1	2	1	0		63	0
578	2	1	2	63	2	5	1	1	1	1	1	1	1	2	1	1	0	0	0	0	0					0	0	2	0	0	0	0	0	0	0	0	0	0	0	1	0	0	1	2	1	0		73	0
579	2	1	1	72	2	2	1	1	1	2	2	1	2	3	0											0	0	3	0	0	0	0	0	0	0	0	0	0	0	1	0	0	1	1	1	1	30	43	1
580	2	1	2	43	1	4	1	1	1	1	2	1	1	3	0											0	0	2	0	0	0	0	0	0	0	0	0	0	0	1	1	0	1	2	1	0		37	0
581	2	1	2	61	2	5	1	1	1	1	1	1	1	2	1	1	0	0	0	0	0					0	0	2	0	0	0	0	0	0	0	0	0	0	0	1	1	0	1	2	1	1	61	6	0
582	2	1	1	70	2	8	1	1	1	1	2	1	1	3	1	0	1	0	0	0		0				0	0	3	0	0	0	0	0	0	0	0	0	0	0	1	0	0	1	1	1	1	31	43	1
583	2	1	1	85	2	7	1	1	1	1	2	1	1	2	1	0	1	0	0	0		0				0	0	2	0	0	0	0	0	1	0	0	0	0	0	0	0	0	1	1	1	1	24	102	1
584	2	1	2	52	1	2	1	1	1	1	2	1	1	2	1	0	1	0	0	0		0				1	0	1	0	1	0	0	1	0	1	0	0	0	0	1	0	0	1	2	1	0		16	0
585	2	1	2	76	2	3	1	1	1	1	2	1	1	3	0											1	0	3	0	0	0	0	1	1	0	0	1	0	0	1	1	0	1	1	1	1	21	85	1
586	2	1	2	71	2	3	1	1	1	2	2	1	1	2	0											1	0	2	0	0	0	0	0	0	0	0	0	0	0	1	0	0	1	1	1	1	20	74	1
587	2	1	2	56	1	3	1	1	1	1	1	1	1	3	1	0	1	0	0	0		0				0	0	2	0	1	1	1	0	1	0	0	0	0	0	0	0	0	1	3	1	0		3	0
588	2	1	1	61	2	3	1	1	1	1	1	1	1	3	0											0	0	2	0	0	0	0	0	0	0	0	0	0	0	1	1	0	1	2	1	0		66	0
589	2	1	2	38	1	7	1	1	1	1	2	1	1	2	1	1	0	0	0	0	0					0	0	1	0	1	0	0	0	0	0	0	0	0	0	0	0	0	0		0	0
590	2	1	2	52	1	9	1	1	1	1	2	1	1	2	0											1	0	1	1	1	0	0	0	0	0	0	1	1	0	0	0	0	1	2	1	0		13	0
591	2	1	1	84	2	1	1	1	1	1	2	1	1	2	1	0	1	0	0	0		0				1	0	1	0	0	0	0	0	1	0	1	1	1	0	1	1	1	1	1	1	1	15	94	1
592	2	1	1	68	2	3	1	1	1	1	1	1	1	3	0											1	0	1	1	1	0	0	0	1	1	0	1	0	0	1	0	0	1	1	1	1	2	53	1
593	2	1	1	52	1	3	1	1	1	1	1	1	1	2	1	1	0	0	0	0	Ainda não tem o resultado					0	0	2	0	0	0	0	0	0	0	0	0	0	0	0	0	0	1	2	1	0		51	0
594	2	1	2	37	1	8	1	1	1	1	2	1	1	1	1	1	0	0	0	0	1					0	0	2	0	0	0	0	0	0	0	0	0	0	0	0	0	0	0		0	0
595	2	1	1	65	2	2	1	1	1	1	2	1	1	2	0											0	0	2	0	0	0	0	0	1	0	0	0	0	0	1	0	0	1	1	1	0		77	0
596	2	1	1	58	1	6	1	1	1	1	2	1	2	1	0											0	0	1	0	0	0	0	1	0	0	0	1	0	0	1	0	0	0		0	0
597	2	1	2	56	1	4	1	1	1	2	2	1	2	2	0											0	0	2	0	0	0	0	0	0	0	0	0	0	0	1	1	0	1	2	1	0		27	0
598	2	1	2	54	1	5	1	1	1	1	1	1	1	3	0											0	0	3	0	0	0	0	0	0	0	0	0	0	0	0	0	0	1	2	1	0		16	0
599	2	1	2	49	1	8	1	1	1	1	1	1	1	2	1	1	0	0	0	0	1					0	0	1	1	1	1	1	1	1	0	0	1	0	0	0	0	1	1	1	1	0		11	0
600	2	1	1	53	1	3	1	1	1	1	2	1	1	2	0											0	0	2	0	0	0	0	0	0	0	0	0	0	0	0	0	0	0		0	0
601	2	1	2	63	2	2	1	1	1	1	2	1	1	1	1	1	0	0	0	0	0					0	0	2	0	0	0	0	0	0	0	0	0	0	0	0	1	0	1	2	1	0		17	0
602	2	1	1	64	2	5	1	1	1	1	2	1	1	3	0											0	0	1	0	0	0	0	0	0	0	0	0	0	0	1	1	0	1	2	1	0		74	0
603	2	1	2	40	1	8	1	1	1	1	1	1	1	2	1	1	0	0	0	0	0					1	0	2	0	0	0	0	0	0	0	0	0	0	0	0	0	0	1	2	1	0		9	0
604	2	1	2	70	2	2	1	1	1	1	1	1	1	2	0											0	0	2	0	0	0	0	0	0	0	0	0	0	0	1	0	1	1	1	1	1	20	74	1
605	2	1	2	58	1	5	1	1	1	1	2	1	1	2	0											0	0	2	0	0	0	0	0	0	0	0	0	0	0	1	0	1	1	3	1	0		3	0
606	2	1	2	83	2	2	1	1	1	1	2	1	1	1	1	0	0	0	1	0				1		1	0	1	0	0	1	1	1	1	0	0	1	0	0	1	0	0	1	1	1	1	18	94	1
607	2	1	2	70	2	5	1	1	1	1	1	1	1	2	1	0	0	0	1	0				0		0	0	1	0	0	0	0	0	0	0	0	0	0	0	1	0	0	1	1	1	1	21	67	1
608	2	1	2	66	2	7	1	0	1	1	2	1	1	2	0											1	0	2	0	0	0	0	0	0	1	1	0	0	0	1	1	0	1	1	1	1	28	56	1
609	2	1	1	22	1	5	1	1	1	1	1	1	1	2	0											0	0	2	0	0	0	0	0	0	0	0	0	0	0	0	0	0	0		0	0
610	2	1	1	63	2	3	1	1	1	1	1	1	1	2	0											0	0	2	0	0	0	0	0	0	0	0	0	0	0	0	0	0	1	2	1	0		73	0
611	2	1	2	81	2	1	1	1	1	1	2	1	1	3	0											0	0	2	0	0	0	0	0	0	0	0	0	0	0	1	1	0	1	1	1	1	-10	80	1
612	2	1	2	62	2	3	1	1	1	2	2	1	2	2	0											0	0	2	0	0	0	0	0	0	0	0	0	0	0	0	0	0	1	2	1	0		67	0
613	2	1	2	75	2	2	1	1	1	1	1	1	1	2	0											1	0	2	0	0	0	0	0	0	0	0	0	0	0	1	1	0	1	1	1	1	21	77	1
614	2	1	1	18	1	2	1	1	1	1	2	1	1	3	0											0	0	2	0	1	0	0	0	0	0	1	0	0	0	0	0	0	1	2	1	0		56	0
615	2	1	2	57	1	5	1	1	1	1	1	1	1	3	0											1	0	1	0	0	0	0	0	0	0	0	1	0	0	0	0	0	1	1	1	1	14	79	1
616	2	1	2	73	2	8	1	1	1	1	2	1	1	2	0											0	0	2	0	0	0	0	0	0	0	0	0	0	0	0	1	0	1	1	1	1	21	74	1
617	2	1	1	45	1	7	1	1	1	1	2	1	1	3	0											0	0	2	0	1	0	0	0	0	0	0	0	0	0	0	0	0	0		0	0
618	2	1	2	39	1	5	1	1	1	1	2	1	1	3	0											0	0	3	0	0	0	0	0	1	0	0	0	0	0	0	0	0	0		0	0
619	2	1	2	36	1	5	1	1	1	1	2	1	1	2	0											0	0	2	0	0	0	0	0	0	0	0	0	0	0	0	0	0	1	2	1	0		32	0
620	2	1	1	72	2	3	1	1	1	1	1	1	1	2	0											0	0	2	0	0	0	0	0	0	0	0	0	0	0	1	1	0	1	1	1	1	22	73	1
621	2	1	1	55	1	8	1	1	1	1	2	1	1	2	1	0	1	0	0	0		0				0	0	2	0	1	0	0	0	0	0	0	0	0	0	1	1	0	1	2	1	0		57	0
622	2	1	2	49	1	5	1	1	1	1	2	1	1	2	0											0	0	2	0	1	0	0	0	0	0	0	0	0	0	0	0	0	1	1	1	0		11	0
623	2	1	1	39	1	5	1	1	1	1	1	1	1	3	0											0	0	1	0	0	0	0	0	0	0	0	0	0	0	0	0	0	0		0	0
624	2	1	1	58	1	8	1	1	1	1	2	1	1	3	0											0	0	3	0	0	0	0	0	0	0	0	0	0	0	1	1	0	1	2	1	0		71	0
625	2	1	1	60	2	5	1	1	1	1	2	1	1	3	1	1	0	0	0	0	Ainda não tem o resultado					0	0	2	0	0	0	0	0	0	0	0	0	0	0	1	1	0	1	2	1	0		66	0
626	2	1	1	34	1	7	1	1	1	1	2	1	1	3	0											1	0	2	0	0	0	0	0	0	0	0	0	0	0	0	0	0	1	2	1	0		58	0
627	2	1	1	39	1	7	1	1	1	1	1	1	1	3	0											0	0	1	0	0	0	0	0	0	0	0	0	0	0	0	1	0	1	3	1	0		23	0
628	2	1	1	58	1	5	1	1	1	1	2	1	1	3	0											0	0	2	0	1	0	0	1	0	1	0	1	0	0	0	0	0	1	3	1	0		8	0
629	2	1	2	27	1	8	1	1	1	1	2	1	1	3	0											0	0	1	0	1	0	0	0	0	0	0	0	0	0	0	0	0	0		0	0
630	2	1	2	51	1	5	1	1	1	1	1	1	1	3	0											0	0	1	0	0	0	0	0	0	0	0	0	0	0	1	1	0	1	2	1	0		4	0
631	2	1	1	77	2	5	0		1	1	2	1	1	3	0											0	0	2	0	0	0	0	0	0	0	0	0	0	0	1	0	0	1	1	1	1	21	91	1
632	2	1	1	55	1	7	1	1	1	1	2	1	1	1	0											0	0	1	0	0	0	0	0	0	0	0	0	0	0	1	1	0	1	2	1	0		56	0
633	2	1	2	26	1	5	1	1	1	1	2	1	1	3	0											1	0	3	0	0	0	0	1	0	1	0	1	0	0	0	0	0	0		0	0
634	2	1	2	85	2	2	1	1	1	1	2	1	1	2	0											0	0	3	0	0	0	0	0	0	0	0	0	0	0	0	0	0	1	1	1	1	57	67	1
635	2	1	2	31	1	8	1	1	1	1	1	1	1	1	1	0	0	1	1	0			1	1		0	0	1	0	0	0	0	0	0	0	0	0	0	0	0	0	0	0		0	0
636	2	1	2	48	1	4	1	1	1	1	2	1	1	2	1	1	0	0	0	0	0					1	0	2	0	1	0	0	0	0	0	0	1	0	0	0	0	0	0		0	0
637	2	1	1	48	1	8	1	1	1	1	2	1	1	3	0											1	0	3	1	1	0	0	0	1	0	0	1	0	0	0	0	0	1	2	1	0		41	0
638	2	1	1	27	1	2	1	1	1	1	2	1	1	2	0											0	0	2	0	0	0	0	0	0	0	0	0	0	0	0	0	0	0		0	0
639	2	1	1	57	1	5	1	1	1	1	1	1	1	3	0											0	0	2	0	0	0	0	0	0	0	0	0	0	0	0	0	0	0		0	0
640	2	1	1	61	2	5	1	1	1	1	2	1	1	2	0											0	0	3	0	0	0	0	0	0	0	0	0	0	0	1	0	0	1	2	1	0		80	0
641	2	1	2	76	2	2	1	1	1	1	2	1	1	2	0											0	0	2	0	0	0	0	0	0	0	0	0	0	0	0	1	0	1	1	1	1	21	80	1
642	2	1	2	57	1	8	1	1	1	1	2	1	1	1	1	1	0	0	0	0	1					0	0	2	0	1	0	0	0	0	0	0	0	0	0	1	0	0	1	2	1	0		61	0
643	2	1	2	74	2	4	1	1	1	1	1	1	1	1	1	0	1	0	0	0		0				0	0	1	0	0	0	0	0	0	0	0	1	0	0	1	1	0	1	1	1	1	21	82	1
644	2	1	2	45	1	8	1	0	1	1	2	1	1	2	0											0	0	2	0	0	0	0	0	0	1	0	0	0	0	0	0	0	0		0	0
645	2	1	1	48	1	8	1	1	1	1	1	1	1	1	1	1	0	0	1	0	1			1		1	0	2	1	0	0	0	1	1	0	0	1	0	0	1	1	0	0		0	0
646	2	1	2	49	1	7	1	1	1	1	2	1	1	2	1	1	0	0	0	0	0					0	0	2	0	0	0	0	0	0	0	0	1	0	0	0	0	0	0		0	0
647	2	1	2	19	1	4	1	0	1	3	2	1	3	3	0											0	0	3	0	1	0	0	0	0	0	0	0	0	1	0	0	0	0		0	0
648	2	1	1	60	2	5	1	1	1	1	1	1	2	3	0											0	0	3	0	0	0	0	0	0	0	0	0	0	0	1	1	0	1	2	1	0		31	0
649	2	1	2	59	1	8	1	0	1	1	2	1	1	1	1	0	0	0	1	0				0		0	0	2	0	0	0	0	1	1	0	0	0	1	0	1	0	1	0		0	0
650	2	1	2	65	2	4	1	1	1	1	2	1	1	3	1	1	0	0	0	0	Ainda não tem o resultado					0	0	3	0	0	0	0	0	0	0	0	0	0	0	0	0	0	1	2	1	0		68	0
651	2	1	1	54	1	5	1	1	1	2	1	1	1	3	0											0	0	3	0	0	0	0	0	0	0	0	0	0	0	0	0	0	0		0	0
652	2	1	2	59	1	3	0		1	2	1	1	2	1	0											0	0	1	0	0	0	0	0	0	0	1	0	0	0	1	1	1	1	2	1	0		34	0
653	2	1	2	64	2	2	1	1	1	2	2	1	1	3	0											0	0	3	0	0	0	0	0	0	0	0	0	0	0	1	0	0	1	2	1	0		45	0
654	2	1	1	61	2	5	1	1	1	1	2	1	1	3	0											0	0	2	0	0	0	0	0	0	0	0	0	0	0	1	0	0	1	2	1	1	56	14	1
655	2	1	1	40	1	5	1	1	1	2	2	1	3	2	0											1	0	2	0	1	0	0	0	0	0	0	1	0	0	0	0	1	0		0	0
656	2	1	1	35	1	9	1	1	1	1	2	1	1	3	0											0	0	1	0	0	0	0	0	0	0	0	0	0	0	0	0	0	1	2	1	0		37	0
657	2	1	2	63	2	4	1	1	1	1	1	1	1	3	1	0	1	0	0	0		0				0	0	3	0	0	0	0	0	0	0	0	0	0	0	1	1	0	1	2	1	1	56	14	1
658	2	1	2	57	1	5	1	1	1	1	2	1	1	3	0											0	0	2	0	0	0	0	0	0	0	0	0	0	0	0	0	0	1	2	1	0		23	0
659	2	1	2	68	2	2	1	1	1	1	2	1	1	2	1	1	0	0	1	0	0			0		0	0	2	0	0	0	0	0	0	0	0	0	0	0	1	0	0	1	1	1	1	21	68	1
660	2	1	1	26	1	5	1	1	1	1	1	1	2	3	0											0	0	2	0	0	0	0	0	0	0	0	0	0	0	0	0	0	0		0	0
661	2	1	2	61	2	2	1	1	1	1	2	1	1	3	0											0	0	2	0	0	0	0	0	0	0	0	0	0	0	0	0	0	1	2	1	0		69	0
662	2	1	2	25	1	4	1	1	1	2	2	1	3	2	0											0	0	2	0	0	0	0	0	0	0	0	0	0	0	0	0	0	0		0	0
663	2	1	1	47	1	5	1	1	1	1	2	1	1	3	0											0	0	2	0	1	0	0	1	0	0	0	0	0	0	0	0	0	0		0	0
664	2	1	2	48	1	5	1	1	1	1	1	1	1	3	0											0	0	3	0	0	0	0	0	0	0	0	0	0	0	1	0	0	1	2	1	0		39	0
665	2	1	1	73	2	2	1	1	1	1	1	0	1	3	0											0	0	1	0	0	0	0	0	0	0	0	0	0	0	0	0	0	1	1	1	1	20	77	1
666	2	1	2	62	2	2	1	1	1	1	2	1	1	2	0											1	0	2	0	1	0	0	1	1	0	0	0	0	0	1	0	0	0		0	0
667	2	1	2	46	1	8	1	1	1	2	1	1	1	3	0											1	0	2	1	0	0	0	0	0	0	0	0	0	0	0	0	0	1	3	1	0		13	0
668	2	1	1	52	1	5	1	1	1	1	2	1	1	3	0											0	0	2	0	0	0	0	0	0	0	0	0	0	0	1	0	0	1	2	1	0		45	0
669	2	1	2	70	2	5	1	1	1	1	2	1	2	3	1	0	0	0	1	0				0		0	0	3	0	0	0	0	0	1	0	0	1	0	0	1	0	0	1	1	1	1	21	70	1
670	2	1	1	65	2	5	1	1	1	1	1	1	1	3	0											0	0	2	0	0	0	0	0	0	0	0	0	0	0	1	0	0	1	1	1	1	33	47	1
671	2	1	2	46	1	8	1	1	1	1	2	1	1	3	0											0	0	2	0	1	0	0	0	0	0	0	1	0	0	0	0	1	0		0	0
672	2	1	1	24	1	7	1	1	1	2	1	1	2	3	0											0	0	2	0	0	0	0	0	0	0	0	0	0	0	0	0	0	0		0	0
673	2	1	2	63	2	1	1	1	1	1	1	1	1	3	0											1	0	1	0	0	0	0	0	0	0	0	0	0	0	1	0	1	1	2	1	1	59	17	1
674	2	1	2	61	2	5	1	1	1	1	2	1	1	3	0											0	0	2	0	1	0	0	0	0	0	1	0	0	0	0	0	0	1	2	1	0		68	0
675	2	1	2	30	1	7	1	1	1	1	2	1	1	3	0											0	0	2	0	0	0	0	0	0	1	0	0	0	0	0	0	0	1	2	1	0		4	0
676	2	1	2	67	2	8	1	1	1	1	1	1	1	3	0											0	0	2	0	0	0	0	0	0	0	0	0	0	0	1	1	1	1	1	1	0		83	0
677	2	1	1	20	1	5	1	1	1	1	1	1	2	3	0											0	0	2	0	0	0	0	0	0	0	0	0	0	0	0	0	0	0		0	0
678	2	1	2	79	2	2	1	1	1	1	2	1	1	1	1	0	0	0	1	0				1		0	1	2	0	1	0	1	0	0	0	1	0	0	0	1	0	1	1	1	1	1	21	81	1
679	2	1	2	46	1	5	1	1	1	1	1	1	1	2	0											0	0	1	0	0	0	0	0	0	0	0	0	0	0	0	0	0	0		0	0
680	2	1	1	35	1	2	1	1	1	1	1	1	1	3	0											1	0	1	0	0	0	0	0	0	0	0	1	0	0	0	0	0	0		0	0
681	2	1	2	36	1	5	1	1	1	2	1	1	1	2	1	0	1	0	0	0		0				0	0	2	0	0	0	0	0	0	0	0	0	0	0	1	0	0	0		0	0
682	2	1	1	23	1	8	1	1	1	2	1	1	2	1	1	1	0	0	0	0	0					0	0	1	0	0	0	0	0	0	0	0	0	0	0	0	0	0	0		0	0
683	2	1	1	73	2	2	1	1	1	2	1	1	2	2	0											0	0	2	0	0	0	0	0	0	0	0	1	0	0	0	1	0	0		0	0
684	2	1	1	20	1	2	0		1	2	1	1	2	2	0											1	0	2	0	1	0	0	0	0	0	0	0	0	0	0	0	0	0		0	0
685	2	1	2	66	2	2	0		1	1	2	1	1	2	1	0	1	0	0	0		0				1	0	2	0	0	0	0	1	0	0	0	0	0	0	1	1	0	1	1	1	1	34	48	1
686	2	2	1	28	1	2	1	1	1	1	1	1	1	3	1	0	0	0	1	0				0		0	0	2	0	0	0	0	0	0	0	0	0	0	0	0	0	0	0		0	0
687	2	2	2	65	2	2	1	1	1	1	2	1	1	2	0											1	0	2	1	0	0	0	0	0	0	0	0	0	0	0	0	0	1	1	1	1	21	61	1
688	2	2	2	55	1	4	0		1	2	2	1	2	2	1	1	0	0	1	0	0			0		1	0	2	0	0	0	0	0	0	0	0	1	0	0	0	0	0	1	2	1	0		26	0
689	2	1	1	56	1	7	1	1	1	1	2	1	1	1	0											1	0	1	0	1	0	0	0	0	1	0	0	1	0	1	1	0	1	2	1	0		61	0
690	2	3	2	62	2	4	1	1	1	1	1	1	1	2	1	1	0	0	1	0	0			0		1	0	1	0	0	0	0	0	0	0	0	1	0	0	0	0	0	1	2	1	0		76	0
691	2	2	1	70	2	8	1	1	1	2	2	1	3	2	0											0	0	2	0	0	0	0	0	0	0	0	0	0	0	0	0	0	1	3	1	0		15	0
692	2	1	2	72	2	2	1	1	1	1	2	1	1	2	0											0	0	1	0	0	0	0	1	0	0	0	0	0	0	1	0	0	1	1	1	1	21	77	1
693	2	1	2	26	1	8	1	1	1	1	2	1	1	3	0											0	0	2	0	0	0	0	1	0	0	0	1	0	0	0	0	0	1	2	1	0		11	0
694	2	1	2	44	1	5	1	1	1	1	2	1	1	2	1	0	0	0	1	0				0		0	0	1	0	1	0	0	0	0	0	0	0	0	0	0	0	0	1	1	1	0		5	0
695	2	2	1	69	2	8	1	1	1	1	2	1	1	2	1	1	0	0	1	0	0			0		0	0	2	0	0	0	0	0	0	0	0	0	0	0	1	0	0	1	1	1	1	34	57	1
696	2	1	2	46	1	4	0		1	1	2	1	1	2	0											0	0	2	1	1	0	0	0	0	0	0	0	0	0	1	1	0	1	2	1	0		75	0
697	2	3	2	41	1	5	1	1	1	1	1	1	1	3	0											0	0	2	0	0	0	0	0	0	0	0	0	0	0	0	0	0	1	2	1	0		78	0
698	2	1	2	63	2	5	1	1	1	1	2	1	1	2	0											1	0	2	0	0	0	0	0	0	1	0	1	0	0	0	0	0	1	2	1	1	62	15	1
699	2	1	2	71	2	7	1	1	1	1	2	1	1	3	0											1	0	2	0	0	0	0	0	0	0	0	0	0	0	1	1	0	1	1	1	1	21	77	1
700	2	2	2	87	2	2	1	1	1	1	2	1	2	2	0											0	0	2	0	0	0	0	0	0	0	0	0	0	0	1	1	0	1	1	1	1	21	106	1
701	2	1	1	75	2	3	1	1	1	1	2	1	1	2	1	0	0	0	1	0				0		0	0	1	0	0	0	0	0	0	0	0	0	0	0	1	0	0	1	1	1	1	28	116	1
702	2	1	1	74	2	1	1	1	1	1	2	1	1	3	0											0	0	2	0	0	0	0	0	1	0	0	0	0	0	1	0	0	1	1	1	1	28	76	1
703	2	1	1	56	1	9	0		1	1	2	1	1	2	0											0	0	2	0	0	0	0	0	0	0	0	0	0	0	1	0	0	1	2	1	0		28	0
704	2	2	1	67	2	4	1	1	1	2	2	1	1	2	0											0	0	2	0	0	0	0	0	0	0	0	0	0	0	0	0	0	1	1	1	1	35	50	1
705	2	3	1	73	2	2	1	1	1	1	1	1	1	2	1	0	0	0	1	0				0		1	0	2	0	0	0	0	0	0	0	0	1	0	0	1	1	0	1	1	1	1	28	71	1
706	2	1	1	33	1	9	0		1	1	1	1	1	2	0											0	0	2	0	0	0	0	0	0	0	0	0	0	0	0	0	0	0		0	0
707	2	1	1	78	2	2	1	1	1	1	2	1	1	2	0											0	0	2	0	0	0	0	0	0	0	0	0	0	0	1	1	0	1	2	1	1	82	40	1
708	2	1	2	37	1	4	1	1	1	1	2	1	1	2	0											0	0	2	0	0	0	0	0	0	0	0	0	0	0	0	0	0	0		0	0
709	2	1	1	19	1	4	1	1	1	1	2	1	1	2	0											0	0	2	0	0	0	0	0	0	0	0	0	0	0	0	0	0	0		0	0
710	2	1	2	47	1	2	0		1	1	1	1	1	2	1	1	0	0	0	0	0					1	0	1	0	1	1	1	1	0	0	0	0	0	0	1	0	0	1	1	1	1	38	50	1
711	2	1	2	19	1	5	1	1	1	1	2	1	1	2	0											0	0	2	0	0	0	0	0	0	0	0	0	0	0	0	0	0	0		0	0
712	2	3	2	43	1	8	1	1	1	1	1	1	1	2	1	0	0	0	1	0				0		1	0	2	0	1	0	0	1	0	1	0	1	0	0	1	0	0	0		0	0
713	2	1	2	48	1	3	1	1	1	1	2	1	1	1	1	0	0	0	1	0				1		0	0	2	0	0	0	0	0	1	0	0	0	0	0	0	0	0	1	3	1	0		6	0
714	2	2	2	60	2	2	1	1	1	1	2	0	2	2	0											0	0	2	0	0	0	0	0	1	0	0	0	0	0	1	0	0	1	2	1	0		76	0
715	2	1	1	36	1	4	1	1	1	1	2	1	1	2	1	0	0	0	1	0				0		0	0	1	0	0	0	0	0	0	0	0	0	0	0	0	0	0	1	2	1	0		15	0
716	2	1	2	57	1	5	1	1	1	1	1	1	1	2	1	0	1	0	0	0		0				0	0	2	0	1	0	0	0	0	0	0	0	0	0	0	0	0	1	2	1	0		17	0
717	2	1	2	48	1	4	1	1	1	1	2	1	1	2	1	0	1	0	0	0		Ainda não tem o resultado				1	0	2	0	0	0	0	0	0	0	0	0	0	0	0	0	0	0		0	0
718	2	2	2	61	2	8	1	1	1	1	2	1	1	2	1	1	0	0	0	0	0					0	0	2	0	0	0	0	0	0	0	0	0	0	0	1	1	0	1	2	1	1	56	15	1
719	2	1	2	53	1	5	1	1	1	1	2	1	1	2	0											0	0	1	0	0	0	0	0	0	0	0	0	0	0	1	0	0	1	2	1	0		55	0
720	2	3	2	51	1	5	1	1	1	1	1	1	1	2	1	0	0	0	1	0				0		0	0	1	0	0	0	0	0	0	0	0	0	0	0	0	0	0	1	1	1	0		5	0
721	2	1	2	60	2	9	1	1	1	1	2	1	1	2	0											0	0	2	0	0	0	0	0	0	0	0	1	0	0	0	0	0	1	2	1	0		60	0
722	2	1	2	53	1	2	1	1	1	1	2	1	1	2	0											1	0	1	0	0	0	0	1	0	0	0	0	0	0	0	0	0	1	3	1	0		6	0
723	2	1	2	78	2	2	0		1	1	1	1	1	2	0											0	0	2	0	0	0	0	0	0	0	0	0	0	0	0	0	0	1	1	1	1	21	82	1
724	2	1	2	72	2	3	1	1	1	1	2	1	1	2	0											0	0	2	0	0	0	0	0	0	0	0	0	0	0	1	0	0	1	1	1	1	21	78	1
725	2	1	1	42	1	5	1	0	1	1	2	1	1	2	1	1	0	0	0	0	0					0	0	2	0	0	0	0	0	0	0	0	1	0	0	0	0	0	1	1	1	0		6	0
726	2	1	2	60	2	4	0		1	1	1	1	1	2	0											1	0	2	0	0	0	0	0	0	0	0	0	0	0	1	0	0	1	2	1	0		70	0
727	2	1	2	28	1	8	1	1	1	1	2	1	1	2	0											0	0	1	0	0	0	0	0	0	0	0	0	0	0	0	0	0	0		0	0
728	2	1	2	57	1	8	1	1	1	1	2	1	1	2	1	1	0	0	0	0	0					0	0	2	0	0	0	0	0	0	0	0	0	0	0	1	0	0	1	2	1	0		61	0
729	2	1	2	64	2	5	1	1	1	1	2	1	2	2	0											0	0	1	0	0	0	0	0	0	0	0	0	0	0	0	0	0	1	2	1	0		78	0
730	2	1	2	58	1	2	1	1	1	1	2	1	1	2	1	1	0	0	0	0	0					0	0	2	0	0	0	0	0	0	0	0	0	0	0	1	0	0	1	2	1	0		11	0
731	2	1	1	63	2	2	1	1	1	1	2	1	1	2	1	0	0	1	0	0			0			0	0	2	0	0	0	0	0	0	0	0	0	0	0	0	0	0	1	2	1	0		64	0
732	2	1	1	53	1	2	0		0	4	1	1	1	2	0											1	0	1	0	0	0	0	0	0	0	0	0	0	0	1	1	0	1	2	1	0		60	0
733	2	1	2	61	2	6	1	1	1	1	2	1	1	2	0											0	0	2	0	0	0	0	0	0	0	0	1	0	0	0	0	0	1	2	1	0		71	0
734	2	1	1	82	2	8	1	1	1	1	1	1	1	3	0											0	0	2	0	0	0	0	0	0	0	0	0	0	0	0	0	0	1	1	1	1	28	104	1
735	2	1	2	51	1	5	1	1	1	1	2	1	1	2	0											0	0	1	0	0	0	0	1	0	0	1	0	0	0	1	0	0	1	2	1	0		56	0
736	2	1	1	37	1	9	0		1	1	2	1	1	3	0											1	0	2	0	0	0	0	0	0	0	0	1	0	0	0	0	0	0		0	0
737	2	1	2	25	1	7	1	1	1	1	1	1	2	3	0											0	0	3	0	0	0	0	0	0	0	0	0	0	0	0	0	0	0		0	0
738	2	1	2	59	1	9	1	1	1	1	2	1	1	2	0											0	0	2	0	1	0	0	0	0	0	0	1	0	0	1	0	0	1	2	1	0		62	0
739	2	1	2	63	2	5	1	1	1	2	2	1	2	3	0											0	0	3	0	0	0	0	0	0	0	0	0	0	0	0	0	0	1	2	1	0		78	0
740	2	1	2	65	2	5	1	1	1	1	1	1	1	2	1	0	1	0	0	0		0				0	0	2	0	0	0	0	0	0	0	0	0	0	0	0	0	0	1	1	1	1	34	49	1
741	2	1	2	23	1	5	1	1	1	1	2	1	1	3	0											0	0	2	0	1	0	0	0	0	0	0	0	0	0	0	0	0	1	2	1	0		22	0
742	2	1	1	20	1	5	1	1	1	2	2	1	2	3	0											1	0	2	0	0	0	0	0	0	0	0	0	0	0	0	0	0	0		0	0
743	2	1	1	40	1	5	1	1	1	1	2	1	1	1	1	0	1	0	0	0		0				1	0	1	1	1	0	0	0	1	0	0	1	0	0	0	1	0	1	2	1	0		29	0
744	2	1	2	60	2	2	1	1	1	1	2	1	1	2	0											1	0	1	0	0	0	0	1	0	0	0	0	0	0	0	0	0	1	2	1	0		64	0
745	2	1	2	63	2	4	1	1	1	1	2	1	1	1	1	1	0	0	0	0	1					0	0	1	0	0	0	0	0	0	0	0	0	0	0	0	0	0	1	2	1	0		78	0
746	2	1	2	40	1	8	1	1	1	1	1	1	1	2	0											0	0	2	0	0	0	0	0	1	0	0	0	0	0	0	0	0	0		0	0
747	2	1	2	64	2	1	1	1	1	1	1	1	1	3	0											0	0	2	0	0	0	0	0	1	0	1	0	0	0	0	0	0	1	2	1	0		79	0
748	3	3	2	65	2	3	1	1	1	1	1	1	1	2	0											0	0	2	0	0	0	0	0	0	0	0	0	0	0	1	1	0	1	2	1	1	30	121	1
749	3	3	2	52	1	2	1	1	1	1	2	1	1	3	0											0	0	1	0	0	0	0	0	1	1	0	1	0	0	0	0	0	1	3	1	0		28	0
750	3	3	1	56	1	5	1	1	1	1	2	1	2	2	1	0	1	0	0	0		0				0	0	2	0	0	0	0	0	0	0	0	0	0	0	0	0	0	1	2	1	0		50	0
751	3	3	2	28	1	5	1	0	1	1	1	1	1	1	1	1	0	0	0	0	1					0	0	1	1	1	1	1	1	1	1	1	1	1	1	0	0	0	0		0	0
752	3	3	1	72	2	3	1	1	1	2	2	1	2	2	1	0	1	0	0	0		0				1	0	2	0	0	0	0	1	0	1	0	1	0	0	1	0	0	1	1	1	1	21	100	1
753	3	3	2	70	2	5	1	1	1	1	2	1	1	1	1	1	0	0	1	0	1			0		0	0	1	0	1	0	0	1	1	0	1	0	0	0	1	1	0	1	1	1	1	21	99	1
754	3	3	1	24	1	5	1	1	1	1	1	1	1	1	1	1	0	0	1	0	1			1		0	0	1	1	1	1	1	1	1	1	1	1	1	1	0	0	0	0		0	0
755	3	3	2	34	1	5	1	1	1	2	2	1	1	2	0											1	0	2	0	0	0	0	1	0	1	0	1	0	0	0	0	0	1	1	1	0		0	0
756	3	3	1	51	1	2	0		0	1	1	1	1	2	1	0	0	0	1	0				0		1	0	2	0	0	0	0	0	0	0	0	0	0	0	0	0	0	1	1	1	0		16	0
757	3	3	1	59	1	6	1	1	1	2	1	1	1	3	0											0	0	2	0	0	0	0	0	0	0	0	0	0	0	0	0	0	1	2	1	0		50	0
758	3	3	2	53	1	5	1	1	1	1	2	1	1	2	1	0	1	0	0	0		0				0	0	2	0	0	1	1	1	1	0	0	0	0	0	1	1	0	1	2	1	1	64	15	1
759	3	3	2	55	1	3	1	1	1	1	2	1	1	3	0											0	0	1	0	1	0	0	0	0	0	1	0	0	0	0	0	0	1	3	1	0		29	0
760	3	3	2	86	2	2	1	1	1	1	2	1	1	2	0											0	0	2	0	0	0	0	0	0	0	0	1	0	0	1	1	0	1	1	1	1	25	124	1
761	3	3	2	77	2	3	1	1	1	1	2	1	2	2	1	1	0	0	0	0	0					1	0	2	0	0	0	0	1	1	0	0	1	0	0	0	0	0	1	1	1	1	28	113	1
762	3	3	2	30	1	2	0		1	1	2	1	1	1	1	1	0	0	0	0	1					1	0	1	0	1	0	0	0	1	0	1	1	0	1	0	0	0	0		0	0
763	3	3	2	71	2	8	1	1	1	1	2	1	1	2	1	0	1	0	0	0		0				0	0	2	0	0	0	0	0	0	0	1	1	0	0	0	0	1	1	1	1	1	21	99	1
764	3	3	1	28	1	4	1	1	1	3	2	1	3	2	0											1	0	2	0	1	0	0	1	0	0	0	1	0	0	0	0	0	0		0	0
765	3	3	2	44	1	2	1	1	1	1	2	1	1	3	0											0	0	2	0	1	0	0	0	1	0	0	0	0	0	0	0	0	0		0	0
766	3	3	1	68	2	3	1	1	1	2	2	1	3	2	0											1	0	2	0	1	0	0	1	0	0	0	0	0	0	1	0	0	1	1	1	1	35	61	1
767	3	3	1	60	2	2	1	1	1	1	2	1	1	2	1	1	0	0	0	0						0	0	2	0	0	0	0	0	1	0	0	0	0	0	0	0	0	0		0	0
768	3	3	1	47	1	3	1	1	1	1	1	1	1	1	1	0	0	0	1	0				1		1	0	2	1	1	1	1	1	1	1	1	1	1	1	0	0	0	0		0	0
769	3	3	1	56	1	3	1	1	1	2	1	1	1	3	0											0	0	1	0	0	0	0	0	0	0	0	0	0	0	1	0	0	1	2	1	1	61	24	1
770	3	3	1	63	2	7	1	0	1	1	1	1	1	2	1	0	0	0	1	0				0		0	0	1	0	0	0	0	0	0	0	0	0	0	0	0	0	0	1	2	1	1	84	15	1
771	3	3	1	55	1	5	1	1	1	1	1	1	1	2	0											0	0	2	0	0	0	0	0	0	0	0	0	0	0	1	0	0	1	2	1	0		83	0
772	3	3	2	64	2	5	1	1	1	2	1	1	2	3	0											0	0	3	0	0	0	0	0	0	0	0	0	0	0	1	1	0	1	2	1	1	88	12	0
773	3	3	2	30	1	5	1	1	1	1	1	1	1	2	0											0	0	2	0	0	0	0	0	0	0	0	0	0	0	0	1	0	1	2	1	0		44	0
774	3	3	2	52	1	5	1	1	1	2	1	1	2	2	1	0	0	0	1	0				0		1	0	1	0	1	0	0	1	1	1	1	0	0	1	0	0	1	0		0	0
775	3	3	2	66	2	5	1	1	1	1	2	1	1	2	1	1	0	0	0	0	0					0	0	2	0	1	0	0	1	1	0	0	0	0	0	1	0	0	1	1	1	1	33	71	1
776	3	3	1	32	1	5	1	1	1	1	2	1	1	1	1	0	0	0	1	0				0		0	0	2	0	0	0	0	0	0	0	0	0	0	0	0	0	0	0		0	0
777	3	3	1	69	2	4	1	1	1	1	1	1	1	2	0											0	0	2	0	0	0	0	0	0	0	0	0	0	0	1	0	0	1	1	1	1	41	72	1
778	3	3	2	61	2	8	1	1	1	1	1	1	1	2	1	1	0	0	0	0	0					0	0	3	0	0	0	0	0	0	0	0	0	0	0	1	0	0	1	2	1	1	84	13	0
779	3	3	1	70	2	2	1	1	1	1	2	1	1	2	1	0	1	0	0	0		0				0	0	2	0	0	0	0	1	0	0	0	0	0	0	1	1	1	1	1	1	1	22	98	1
780	3	3	2	48	1	8	1	1	1	1	2	1	2	1	1	1	0	0	1	0	1			0		1	0	1	0	0	0	0	0	0	0	0	1	0	0	1	0	0	1	2	1	1	61	1	0
781	3	3	1	68	2	5	1	1	1	2	2	1	1	2	0											1	0	2	0	0	0	0	0	0	0	0	0	0	0	0	0	0	1	1	1	1	39	72	1
782	3	3	1	46	1	8	1	1	1	1	2	1	1	3	0											0	0	2	0	0	0	0	1	0	0	0	0	0	0	0	0	0	1	1	1	0		8	0
783	3	3	2	22	1	5	1	1	1	1	1	1	1	2	0											0	0	2	0	0	0	0	0	0	0	0	0	0	0	0	0	0	0		0	0
784	3	3	2	59	1	8	1	1	1	1	2	1	1	2	1	1	0	0	0	0	0					0	0	2	0	0	0	0	0	0	0	0	0	0	0	0	0	0	1	2	1	1	86	9	0
785	3	3	2	73	2	5	1	1	1	1	2	1	1	2	0											1	0	2	0	0	0	0	1	0	0	0	1	0	0	1	0	0	1	1	1	1	21	100	1
786	3	3	2	20	1	7	1	1	1	1	1	1	1	3	0											1	0	2	0	1	0	0	0	0	1	0	1	0	0	0	0	0	0		0	0
787	3	3	2	58	1	2	1	1	1	1	2	1	1	3	0											0	0	2	0	0	0	0	0	0	0	0	0	0	0	0	0	0	1	2	1	1	84	0	0
788	3	3	1	30	1	5	1	1	1	2	2	1	1	1	1	1	0	0	0	0	1					0	0	3	0	0	0	0	0	0	0	0	0	0	0	1	0	0	1	3	1	0		36	0
789	3	3	2	42	1	3	1	1	1	1	2	1	1	2	1	1	0	0	1	0	0			0		0	0	2	0	1	0	0	0	0	1	0	0	0	0	1	0	0	0		0	0
790	3	3	2	61	2	5	1	1	1	1	1	1	1	2	0											1	0	2	0	0	0	0	0	0	0	0	0	0	0	0	0	0	1	2	1	1	84	8	0
791	3	3	1	70	2	5	1	1	1	1	1	1	1	2	0											0	0	2	0	0	0	0	0	0	0	0	0	0	0	0	0	0	1	1	1	1	21	99	1
792	3	3	2	63	2	5	1	1	1	1	2	1	1	2	1	0	1	0	0	0		0				0	0	2	0	0	0	0	0	0	0	0	1	0	0	0	0	0	1	2	1	1	89	20	1
793	3	3	2	41	1	3	1	1	1	1	2	1	1	3	1	0	0	0	1	0				0		1	0	2	0	1	0	0	1	1	0	0	1	0	0	0	0	0	1	4	1	0		15	1
794	3	3	2	68	2	8	1	1	1	1	2	1	2	3	0											0	0	2	0	0	0	0	0	0	0	0	0	0	0	1	1	0	1	2	1	1	91	16	1
795	3	3	2	41	1	5	1	1	1	1	2	1	1	3	0											0	0	1	0	1	0	0	0	0	0	0	0	0	0	0	0	0	1	2	1	0		54	0
796	3	3	2	48	1	2	1	1	1	1	2	1	1	2	1	0	0	0	1	0				0		0	0	1	0	0	0	0	0	0	0	0	0	0	0	0	0	0	1	2	1	0		56	0
797	3	3	2	52	1	6	1	1	1	2	2	1	2	2	0											0	0	2	0	0	0	0	1	0	0	0	1	0	0	0	0	0	1	3	1	0		43	0
798	3	3	1	76	2	6	1	1	1	2	2	1	1	2	0											0	0	3	0	0	0	0	0	0	0	0	0	0	0	0	0	0	1	1	1	1	28	104	1
799	3	3	2	40	1	6	1	1	1	1	2	1	1	2	0											0	0	2	0	0	0	0	0	0	0	0	0	0	0	0	0	0	1	2	1	0		6	0
800	3	3	1	85	2	8	1	1	1	1	2	1	1	2	0											0	0	2	0	0	0	0	1	0	0	0	1	0	0	0	0	0	1	1	1	1	28	135	1
801	3	3	1	61	2	3	1	1	1	1	2	1	1	2	1	1	0	0	0	0	0					0	0	2	0	0	0	0	0	0	0	0	0	0	0	0	0	0	1	2	1	1	56	37	1
802	3	3	2	43	1	8	1	1	1	1	2	1	1	2	0											1	0	1	0	0	0	0	0	0	0	0	0	0	0	1	0	0	1	2	1	0		56	0
803	3	2	1	49	1	2	1	1	1	1	2	1	1	3	0											0	0	1	0	0	0	0	0	1	0	0	0	0	0	1	0	0	1	2	1	0		6	0
804	3	3	1	55	1	5	1	1	1	2	1	1	1	2	0											1	0	2	0	0	0	0	0	0	0	0	0	0	0	0	0	0	1	3	1	0		21	0
805	3	2	1	70	2	3	1	1	1	1	1	1	1	1	1	1	0	0	0	0	1					1	0	1	0	0	0	0	0	0	0	0	1	0	0	0	0	0	1	1	1	1	28	86	1
806	3	2	2	63	2	2	0		1	1	2	1	1	3	1	0	0	0	1	0				0		1	0	3	1	1	0	0	1	0	1	0	0	0	0	0	0	0	1	2	1	1	84	16	1
807	3	2	2	26	1	2	0		0	2	2	1	2	3	0											1	0	2	0	1	0	0	0	1	1	1	1	0	0	0	0	0	0		0	0
808	3	3	1	44	1	5	1	0	1	1	1	1	1	2	1	0	1	0	1	0		0		0		0	0	2	0	0	0	0	0	0	0	0	0	0	0	0	0	0	1	2	1	0		9	0
809	3	3	2	25	1	1	1	1	1	1	1	1	1	2	0											0	0	2	0	0	0	0	0	0	0	0	0	0	0	0	0	0	1	1	1	0		12	0
810	3	3	1	45	1	5	1	1	1	1	2	1	1	2	0											0	0	2	0	0	0	0	0	0	0	0	0	0	0	1	0	0	1	1	1	0		20	0
811	3	2	1	56	1	2	1	1	1	2	2	1	2	2	1	1	0	0	0	0	0					1	0	2	0	0	0	0	1	0	1	0	1	0	0	1	0	0	1	3	1	0		37	0
812	3	2	2	47	1	5	1	1	1	1	2	1	1	2	1	1	0	0	0	0	0					1	0	2	0	1	0	0	1	1	1	0	1	0	0	0	0	1	0		0	0
813	3	2	2	47	1	1	1	1	1	1	2	1	1	3	0											0	0	2	0	0	0	0	0	0	0	0	0	0	0	1	0	0	1	2	1	0		62	0
814	3	3	1	70	2	2	1	1	1	1	1	1	1	2	0											0	0	2	0	0	0	0	0	0	0	0	0	0	0	0	0	0	1	1	1	1	28	86	1
815	3	3	2	38	1	2	1	1	1	1	1	1	1	2	0											0	0	2	0	0	0	0	0	0	0	0	0	0	0	0	0	0	1	2	1	0		8	0
816	3	2	1	29	1	5	1	1	1	1	2	1	3	2	1	1	0	0	1	0	0			0		1	0	2	0	1	0	0	0	0	0	0	1	0	0	0	0	0	0		0	0
817	3	3	2	57	1	4	1	1	1	1	1	1	1	2	0											1	0	2	0	0	0	0	0	0	0	0	0	0	0	1	0	0	1	2	1	0		62	0
818	3	2	2	26	1	4	1	0	1	1	2	1	1	1	1	1	0	0	0	0	1					1	0	2	1	1	0	0	1	1	1	0	1	1	0	0	0	0	0		0	0
819	3	2	1	33	1	5	1	0	1	1	2	1	1	2	1	1	0	0	0	0	0					0	0	1	0	0	0	0	0	0	0	0	0	0	0	0	0	0	1	3	1	0		48	0
820	3	3	2	64	2	2	1	1	1	1	2	1	1	2	0											0	0	2	0	1	0	0	0	1	0	0	1	0	0	1	0	0	1	2	1	1	84	17	1
821	3	2	2	56	1	6	1	1	1	2	2	1	2	2	1	1	0	0	0	0	0					0	0	2	0	0	0	0	0	0	0	0	0	0	0	1	0	0	1	3	1	0		43	0
822	3	2	2	41	1	5	1	1	1	1	1	1	1	2	1	1	0	0	0	0	0					0	0	2	0	0	0	0	0	0	0	0	0	0	0	0	0	0	1	2	1	0		9	0
823	3	3	2	78	2	2	1	1	1	1	1	1	1	2	0											0	0	2	0	0	0	0	0	0	0	0	0	0	0	0	0	0	1	2	1	1	21	104	1
824	3	2	2	29	1	8	1	1	1	1	2	1	1	3	0											0	0	2	0	1	0	0	0	0	0	0	0	0	0	0	0	0	0		0	0
825	3	2	1	25	1	5	1	1	1	1	2	1	2	2	0											1	0	2	0	0	0	0	0	0	0	0	1	0	0	0	0	0	0		0	0
826	3	3	2	22	1	5	1	1	1	1	2	1	1	1	1	1	0	0	0	0	1					1	0	1	0	0	0	0	1	0	0	0	1	1	0	0	0	0	1	4	1	0		22	1
827	3	2	2	57	1	2	1	1	1	2	2	1	2	2	0											0	0	2	0	0	0	0	0	0	0	0	0	0	0	1	1	0	1	2	1	1	84	0	0
828	3	3	2	63	2	5	1	1	1	1	1	1	1	2	0											1	0	2	0	0	0	0	0	0	0	0	0	0	0	1	0	0	1	2	1	0		99	0
829	3	2	1	33	1	8	1	1	1	1	2	1	1	2	1	0	1	0	0	0		0				0	0	1	0	0	0	0	0	0	0	0	0	1	0	0	0	0	1	2	1	0		42	0
830	3	2	2	71	2	2	1	1	1	1	2	1	1	2	0											0	0	2	0	0	0	0	0	0	0	0	0	0	0	1	0	0	1	2	1	1	82	2	0
831	3	2	2	67	2	2	0		1	1	1	1	1	2	0											0	0	2	0	0	0	0	0	0	0	0	0	0	0	0	0	0	0		0	0
832	3	2	2	50	1	2	1	1	1	1	1	1	2	2	0											0	0	2	0	0	0	0	0	0	0	0	0	0	0	0	0	0	1	1	1	1	27	0	0
833	3	3	1	30	1	5	1	1	1	1	1	1	1	2	0											0	0	2	0	0	0	0	0	0	0	0	0	0	0	0	0	0	0		0	0
834	3	3	2	76	2	5	1	1	1	1	2	1	1	2	0											0	0	2	0	0	0	0	0	0	0	0	0	0	0	1	0	0	1	1	1	1	28	113	1
835	3	2	1	42	1	4	1	1	1	1	1	1	1	2	0											0	0	2	0	0	0	0	0	0	0	0	0	0	0	0	0	0	1	2	1	0		10	0
836	3	2	2	56	1	5	1	1	1	1	2	1	1	3	0											0	0	2	0	0	0	0	1	0	0	0	0	0	0	1	0	0	1	2	1	0		80	0
837	3	2	2	84	2	2	1	1	1	1	2	1	1	1	1	1	0	0	0	0	1					0	1	2	0	0	0	0	0	0	0	0	0	0	0	1	1	0	1	1	1	1	21	111	1
838	3	2	1	55	1	2	1	1	1	1	2	1	1	2	0											0	0	2	0	0	0	0	0	0	0	0	0	0	0	0	0	0	1	3	1	0		30	0
839	3	2	2	19	1	2	1	1	1	1	1	1	1	2	0											0	0	2	0	0	0	0	0	0	0	0	0	0	0	0	0	0	1	3	1	0		34	0
840	3	2	2	54	1	2	1	0	1	2	2	1	2	3	0											1	0	3	0	0	0	0	1	0	0	0	0	0	0	1	0	0	1	2	1	0		79	0
841	3	2	1	42	1	5	1	1	1	2	1	1	1	2	0											0	0	2	0	0	0	0	0	0	0	0	0	0	0	0	0	0	1	3	1	0		16	0
842	3	3	1	40	1	5	1	0	1	1	1	1	1	2	0											0	0	2	0	0	0	0	0	0	0	0	0	0	0	0	0	0	0		0	0
843	3	2	2	40	1	2	1	1	1	1	2	1	1	3	0											0	0	3	0	0	0	0	0	0	0	0	0	0	0	0	0	0	1	2	1	0		15	0
844	3	3	1	54	1	8	1	1	1	1	2	1	1	3	0											0	0	2	0	1	0	0	0	0	0	0	0	0	0	1	0	0	1	1	1	1	21	92	1
845	3	2	2	62	2	2	1	1	1	1	2	1	2	2	0											0	0	2	0	0	0	0	0	0	0	0	0	0	0	1	0	0	1	2	1	1	56	38	1
846	3	3	2	69	2	3	1	1	1	1	1	1	1	2	0											1	1	2	0	0	0	0	0	0	0	0	0	0	0	0	0	0	1	1	1	1	21	94	1
847	3	2	1	57	1	2	1	1	1	1	1	1	1	2	0											0	0	2	0	0	0	0	0	0	0	0	0	0	0	0	0	0	1	3	1	0		31	0
848	3	3	2	47	1	8	1	1	1	1	1	1	1	2	0											0	0	2	0	0	0	0	0	0	0	0	0	0	0	1	0	0	0		0	0
849	3	3	1	55	1	8	0		1	1	2	1	1	3	0											0	0	2	0	0	0	0	0	0	0	0	0	0	0	1	0	0	1	2	1	1	66	14	1
850	3	2	1	18	1	4	1	1	1	1	2	1	1	3	0											0	0	3	0	0	0	0	0	0	0	0	0	0	0	0	0	0	1	3	1	0		41	0
851	3	2	2	27	1	8	0		1	1	1	1	1	2	1	1	0	0	0	0	0					0	0	2	0	0	0	0	0	0	0	0	0	0	0	0	0	0	0		0	0
852	3	2	1	59	1	8	1	1	1	1	2	1	1	2	1	0	0	0	1	0				0		1	0	1	0	0	0	0	0	0	0	0	1	0	0	1	0	0	1	2	1	1	84	7	0
853	3	3	1	61	2	2	1	1	1	1	2	1	1	3	0											1	0	2	0	0	0	0	0	0	0	0	0	0	0	0	0	0	1	2	1	1	84	10	0
854	3	2	1	50	1	4	0		1	1	1	1	1	2	0											0	0	2	0	0	0	0	0	0	0	0	0	0	0	0	0	0	1	2	1	0		43	0
855	3	2	1	66	2	5	1	1	1	1	1	1	1	2	1	0	0	0	1	0				0		0	0	2	0	0	0	0	0	0	0	0	0	0	0	0	0	0	1	1	1	1	33	71	1
856	3	2	2	48	1	9	1	1	1	1	1	1	1	2	0											0	0	2	0	0	0	0	0	0	0	0	0	0	0	0	0	0	1	2	1	1	84	3	0
857	3	3	1	67	2	6	0		1	1	2	1	1	3	1	0	1	0	0	0		0				1	0	3	0	0	0	0	0	0	0	0	0	0	0	0	0	0	1	1	1	1	28	80	1
858	3	2	2	37	1	4	0		1	1	1	1	1	3	0											0	0	2	0	0	0	0	0	0	0	0	0	0	0	0	0	0	0		0	0
859	3	2	1	21	1	5	1	1	1	1	1	1	1	2	0											0	0	2	0	0	0	0	0	0	0	0	0	0	0	0	0	0	0		0	0
860	3	2	1	56	1	4	1	1	1	1	1	1	1	1	1	1	0	0	1	0	1			1		0	0	2	0	0	0	0	0	0	0	0	0	0	0	0	0	0	1	2	1	1	55	3	0
861	3	2	2	73	2	7	1	1	1	1	2	1	1	3	0											1	0	3	0	0	0	0	0	1	1	1	1	0	0	1	1	0	1	1	1	1	28	100	1
862	3	3	1	64	2	5	1	1	1	1	2	1	1	2	1	0	1	0	0	0		0				0	0	2	0	0	0	0	0	0	0	0	0	0	0	0	0	0	1	2	1	1	93	18	1
863	3	2	1	46	1	5	0		1	1	2	1	1	2	1	0	0	0	1	0				0		0	0	1	0	1	1	0	0	0	1	0	0	0	0	1	0	0	1	3	1	0		22	0
864	3	2	1	73	2	5	1	1	1	1	2	1	1	2	0											1	0	2	0	0	1	0	1	0	0	0	0	0	0	1	0	0	1	1	1	1	21	102	1
865	3	2	1	71	2	2	1	1	1	1	2	1	1	2	0											1	0	2	0	0	0	0	0	0	0	0	1	0	0	0	0	0	1	1	1	1	22	106	1
866	3	2	1	38	1	7	0		1	1	2	1	1	2	1	0	1	0	0	0		0				0	0	2	0	0	0	0	0	0	0	0	0	0	0	0	0	0	0		0	0
867	3	2	2	49	1	2	1	1	1	2	1	1	1	2	0											0	0	2	0	0	0	0	0	0	0	0	0	0	0	1	0	0	1	2	1	0		33	0
868	3	3	1	62	2	2	1	0	1	1	2	1	1	2	0											0	0	2	0	0	0	0	0	0	0	0	0	0	0	1	0	0	1	2	1	1	84	16	1
869	3	2	2	26	1	5	0		1	1	1	1	1	2	0											0	0	2	0	0	0	0	0	0	0	0	0	0	0	1	0	0	1	1	1	1	53	53	1
870	3	2	2	84	2	2	1	1	1	1	1	1	1	2	0											0	0	1	1	1	1	1	1	1	1	1	1	1	1	1	0	0	1	1	1	1	21	112	1
871	3	2	1	48	1	5	1	1	1	1	2	1	1	1	1	1	0	0	0	0	1					0	1	1	0	0	0	0	0	0	0	1	0	0	0	0	0	0	0		0	0
872	3	2	2	41	1	8	1	1	1	1	1	1	1	2	1	1	0	0	1	0	0			0		1	0	1	0	0	0	0	0	0	0	0	1	0	0	1	0	0	1	2	1	0		63	0
873	3	2	1	60	2	4	1	1	1	1	1	1	1	2	0											0	0	2	0	0	0	0	0	0	0	0	0	0	0	0	0	0	1	2	1	1	78	21	1
874	3	2	2	54	1	4	1	1	1	1	2	1	1	2	1	1	0	0	0	0	0					1	0	2	0	1	0	0	0	0	1	1	1	0	0	0	0	0	1	3	1	0		31	0
875	3	2	1	44	1	3	0		1	1	2	1	1	1	1	0	0	0	0	1					1	1	0	1	1	1	1	1	1	1	1	1	0	0	1	1	0	0	1	3	1	0		18	0
876	3	3	1	32	1	8	0		1	1	2	1	1	3	0											1	0	2	0	0	0	0	0	0	0	0	1	0	0	0	0	0	0		0	0
877	3	2	2	86	2	6	1	1	1	1	2	1	1	1	1	1	0	0	0	0	1					1	0	1	0	0	0	0	0	0	0	0	0	0	0	1	0	1	0		0	0
878	3	2	1	55	1	4	1	1	1	1	2	1	1	3	0											0	0	2	0	0	0	0	0	0	0	0	0	0	0	0	0	0	0		0	0
879	3	2	2	59	1	2	0		1	1	1	1	1	2	0											0	0	2	0	0	0	0	0	0	0	0	0	0	0	0	0	0	1	3	1	0		39	0
880	3	3	2	64	2	8	1	1	1	1	2	1	1	3	0											0	0	2	0	0	0	0	1	0	0	0	1	0	0	1	0	0	1	2	1	1	94	8	0
881	3	2	1	46	1	5	1	1	1	1	2	1	1	1	1	0	1	1	0	0		1	1			0	0	1	0	0	1	1	0	0	0	0	0	0	0	1	0	0	1	2	1	0		21	0
882	3	2	1	30	1	8	1	1	1	1	2	1	1	3	0											0	0	2	0	1	0	0	1	0	0	1	1	1	1	0	0	0	0		0	0
883	3	2	2	67	2	5	0		0	1	1	1	1	2	0											1	0	2	0	0	0	0	0	0	0	0	0	0	0	0	0	0	1	1	1	1	31	81	1
884	3	2	2	53	1	8	1	1	1	2	1	1	1	2	0											0	0	2	0	0	0	0	0	0	0	0	0	0	0	0	0	0	1	2	1	0		70	0
885	3	2	2	54	1	4	1	1	1	1	2	1	1	2	0											0	0	2	0	0	0	0	0	0	0	0	0	0	0	1	0	0	1	2	1	1	73	7	0
886	3	2	2	87	2	5	1	1	1	1	2	1	2	2	0											0	0	2	0	0	0	0	0	0	0	0	0	0	0	0	0	0	1	1	1	1	21	130	1
887	3	2	1	52	1	8	1	1	1	1	2	1	1	1	1	0	0	0	1	0				1		0	0	1	1	0	0	0	0	0	0	1	0	1	1	1	0	0	1	3	1	0		23	0
888	3	2	2	44	1	9	1	1	1	1	2	1	1	1	1	1	0	0	0	0	1					0	1	1	0	1	0	0	0	0	0	0	0	0	0	0	0	0	1	2	1	0		57	0
889	3	2	2	85	2	3	1	1	1	1	2	1	1	2	0											0	0	2	0	0	0	0	0	0	0	0	0	0	0	1	0	0	1	1	1	1	22	118	1
890	3	2	2	48	1	5	1	1	1	1	2	1	1	3	0											0	0	2	0	0	0	0	0	0	0	0	0	0	0	1	1	0	1	2	1	0		45	0
891	3	2	1	66	2	4	1	1	1	1	2	0	1	2	1	0	0	0	1	0				0		1	0	3	0	0	0	0	0	0	0	0	0	0	0	1	0	1	1	1	1	1	34	73	1
892	3	2	2	74	2	2	1	1	1	1	1	1	1	2	0											0	0	3	0	0	0	0	0	0	0	0	0	0	0	1	0	0	1	1	1	1	21	102	1
893	3	2	1	68	2	5	1	1	1	1	2	1	1	3	0											1	0	2	0	0	0	0	0	0	0	0	0	0	0	0	0	0	1	1	1	0		108	0
894	3	2	2	32	1	4	0		0	1	1	1	1	2	0											0	0	2	0	0	0	0	0	0	0	0	0	0	0	0	0	0	0		0	0
895	3	2	2	22	1	5	1	1	1	1	1	1	1	2	0											0	0	3	0	0	0	0	0	0	0	0	0	0	0	0	0	0	0		0	0
896	3	2	1	57	1	2	1	1	1	1	1	1	1	2	0											0	0	2	0	0	0	0	0	0	0	0	0	0	0	0	0	0	1	2	1	1	70	17	1
897	3	2	1	69	2	5	1	1	1	1	2	1	1	2	1	0	1	0	1	0		0		0		0	0	2	0	0	0	0	0	0	0	0	0	0	0	1	0	0	1	1	1	1	39	66	1
898	3	2	1	63	2	4	1	1	1	1	1	1	1	2	0											0	0	2	0	0	0	0	0	0	0	0	0	0	0	0	0	0	1	2	1	1	83	17	1
899	3	2	2	43	1	7	1	1	1	1	2	1	1	3	0											0	0	2	0	1	0	0	0	0	0	0	0	0	0	0	0	0	0		0	0
900	3	2	1	45	1	2	1	1	1	1	1	1	1	2	0											0	0	2	0	0	0	0	0	0	0	0	0	0	0	0	0	0	1	3	1	0		21	0
901	3	2	1	40	1	7	1	1	1	1	2	1	1	3	1	1	1	0	0	0	0	0				0	0	2	0	1	0	0	1	1	1	0	0	0	0	0	0	1	1	2	1	0		25	0
902	3	2	2	60	2	9	0		1	1	2	1	1	1	1	1	0	0	1	0	1			1		1	0	1	0	1	0	0	0	0	0	0	1	0	0	1	0	0	1	2	1	1	84	14	1
903	3	2	1	76	2	8	1	1	1	1	1	1	1	2	0											0	0	2	0	0	0	0	0	0	0	0	0	0	0	0	0	0	1	1	1	1	110	18	1
904	3	2	2	23	1	7	1	1	1	1	2	1	1	2	1	0	0	0	1	0				0		1	0	2	1	1	0	0	1	1	1	0	1	0	1	0	0	0	1	2	1	0		49	0
905	3	2	1	33	1	7	1	1	1	1	2	1	1	2	1	1	0	0	0	0	0					0	0	2	0	0	0	0	0	0	0	0	0	0	0	0	0	0	1	2	1	0		63	0
906	3	2	2	39	1	8	1	1	1	1	2	1	1	2	1	0	0	0	1	0				0		0	0	2	0	0	0	0	0	0	0	0	0	0	0	0	0	0	1	2	1	0		51	0
907	3	2	2	79	2	2	1	1	1	1	1	1	1	1	1	0	0	1	0	0			1			0	0	1	1	1	0	0	1	0	0	0	0	0	0	1	1	0	1	1	1	1	21	107	1
908	3	2	2	22	1	5	0		1	1	1	1	1	2	0											0	0	2	0	0	0	0	0	0	0	0	1	0	0	0	0	0	0		0	0
909	3	2	1	25	1	7	1	1	1	1	2	1	1	2	1	1	1	0	1	0	0	0		0		1	0	2	0	0	0	0	0	0	0	0	1	0	0	0	0	0	1	2	1	0		49	0
910	3	2	1	67	2	5	1	1	1	1	2	1	1	2	1	0	1	0	0	0		0				1	0	2	0	0	0	0	1	0	1	0	1	0	0	1	0	0	1	2	1	1	87	30	1
911	3	2	2	53	1	2	1	1	1	1	2	1	2	1	1	1	0	0	0	0	1					1	0	3	0	1	0	0	1	1	0	1	1	1	1	1	1	0	1	2	1	1	58	22	1
912	3	2	2	28	1	2	1	1	1	1	1	1	1	1	1	0	0	1	1	0			0	1		1	0	3	0	0	0	1	0	0	0	0	0	0	0	0	0	0	0		0	0
913	3	2	1	40	1	5	1	0	1	1	2	1	1	2	1	1	1	0	1	0	0	0		0		0	0	1	0	0	0	0	0	0	0	0	0	0	0	0	0	0	1	1	1	0		0	0
914	3	2	1	38	1	2	1	1	1	1	1	1	1	2	0											0	0	2	0	0	0	0	0	0	0	0	0	0	0	0	0	0	1	4	1	0		22	1
915	3	2	2	23	1	5	1	1	1	1	1	1	1	1	1	1	0	0	0	0	1					0	0	2	0	0	0	0	0	0	0	0	0	0	0	0	0	0	1	1	1	1	25	3	0
916	3	2	2	22	1	5	1	1	1	1	2	1	1	3	0											0	0	2	0	0	0	0	0	0	0	0	0	0	0	0	0	0	0		0	0
917	3	2	2	68	2	2	1	1	1	2	1	1	1	2	0											0	0	2	0	0	0	0	0	1	0	0	0	0	0	1	0	0	1	1	1	1	41	72	1
918	3	2	1	70	2	2	1	1	1	1	2	1	1	1	1	1	0	0	1	0	1			0		0	0	1	0	0	0	0	1	0	0	1	0	0	0	1	0	0	1	1	1	1	76	39	1
919	3	2	1	67	2	4	1	1	1	1	2	1	1	2	1	0	1	0	0	0		0				0	0	2	0	0	0	0	0	0	0	0	0	0	0	1	0	0	1	1	1	1	36	73	1
920	3	2	1	58	1	8	1	0	1	1	2	1	1	1	1	1	0	0	0	0	1					0	0	2	0	0	0	0	0	0	0	0	0	0	0	1	0	0	1	3	1	0		36	0
921	3	2	2	81	2	8	1	1	1	1	2	1	1	2	1	0	1	0	0	0		0				0	0	2	0	0	0	0	0	0	0	0	0	0	0	1	0	0	1	1	1	1	21	109	1
922	3	2	2	32	1	8	1	1	1	1	1	1	1	2	1	1	0	0	1	0	0			1		0	0	2	0	0	0	0	1	0	0	1	0	0	0	0	0	0	0		0	0
923	3	1	1	50	1	8	1	1	1	1	1	1	1	1	1	0	1	0	1	0		1		1		0	0	1	0	1	1	1	1	1	1	0	1	0	0	0	0	0	1	2	1	0		45	0
924	3	1	2	69	2	3	1	1	1	1	2	1	1	1	1	0	1	0	1	0		0		1		1	1	1	0	0	0	0	1	0	1	0	1	0	0	0	1	1	1	2	1	1	89	61	1
925	3	1	2	59	1	7	1	1	1	1	2	1	1	3	0											0	0	2	0	0	0	0	0	0	0	0	0	0	0	1	0	0	1	2	1	1	85	10	0
926	3	2	2	57	1	8	1	1	1	1	2	1	1	3	0											0	0	2	0	0	0	0	0	0	0	0	0	0	0	1	0	0	1	3	1	0		38	0
927	3	1	2	43	1	7	1	1	1	1	1	1	1	2	1	0	1	0	0	0		0				1	0	1	0	0	0	0	0	1	1	0	1	1	1	1	0	0	1	2	1	0		60	0
928	3	1	1	56	1	5	1	0	1	1	2	1	1	3	0											0	0	2	0	0	0	0	0	0	0	0	0	0	0	0	0	0	1	1	1	0		5	0
929	3	2	2	49	1	8	1	1	1	1	2	1	2	3	0											0	0	3	0	0	0	0	0	0	0	0	0	0	0	0	0	0	1	2	1	1	84	31	1
930	3	1	2	44	1	2	1	1	1	1	1	1	1	2	0											0	0	2	0	0	0	0	1	0	0	1	1	0	0	0	0	0	1	3	1	0		20	0
931	3	1	1	58	1	5	1	1	1	1	1	1	1	2	0											0	0	2	0	0	0	0	0	0	0	0	0	0	0	1	0	0	1	1	1	1	21	74	1
932	3	2	2	58	1	4	0		1	1	1	1	1	2	0											0	0	2	0	0	0	0	0	0	0	0	0	0	0	0	0	0	1	2	1	0		58	0
933	3	1	2	48	1	5	1	0	1	1	2	1	1	3	0											0	0	3	0	1	0	0	0	0	0	0	1	0	0	0	0	0	1	2	1	0		27	0
934	3	1	1	24	1	5	1	1	1	1	2	1	1	2	1	1	0	0	0	0	0					1	0	2	1	0	0	0	0	0	0	0	1	0	0	0	0	0	0		0	0
935	3	1	1	54	1	4	1	0	1	1	1	1	1	1	1	0	1	0	0	0		1				1	0	1	1	1	1	1	1	1	1	1	1	1	1	1	0	0	1	2	1	0		23	0
936	3	1	1	46	1	3	1	1	1	2	1	1	2	3	0											0	0	2	0	0	0	0	0	0	0	0	0	0	0	0	0	0	1	1	1	0		24	0
937	3	1	2	69	2	6	0		0	1	2	1	1	3	0											1	0	2	0	0	0	0	0	0	0	0	1	0	0	0	0	0	1	1	1	1	28	91	1
938	3	1	1	41	1	5	1	1	1	1	1	1	1	2	0											1	0	2	0	0	0	0	0	0	0	0	0	0	0	0	1	0	1	2	1	0		76	0
939	3	2	1	28	1	5	1	1	1	1	1	1	1	2	0											0	0	2	0	0	0	0	0	0	0	0	0	0	0	0	0	0	1	2	1	1	88	3	0
940	3	1	1	59	1	8	1	1	1	1	2	1	1	3	0											1	0	2	0	0	0	0	1	0	0	0	0	0	0	1	0	0	1	2	1	0		54	0
941	3	1	1	74	2	2	0		0	3	2	1	1	2	1	0	0	0	1	0				0		0	0	2	0	0	0	0	1	0	0	0	1	0	0	0	0	0	1	1	1	1	28	104	1
942	3	1	1	81	2	5	1	1	1	1	1	1	1	1	1	0	1	0	0	0		1				0	0	2	1	0	1	0	0	1	0	0	0	0	0	0	0	0	1	1	1	0		44	0
943	3	1	2	74	2	5	1	1	1	1	1	1	1	2	0											0	0	2	0	0	0	0	0	0	0	0	0	0	0	0	0	0	1	1	1	1	31	110	1
944	3	2	2	57	1	5	1	1	1	1	1	1	1	2	0											0	0	2	0	0	0	0	0	0	0	0	0	0	0	0	0	0	1	3	1	0		38	0
945	3	1	1	22	1	5	1	1	1	2	2	1	1	3	0											0	0	2	0	0	0	0	0	0	0	0	0	0	0	0	0	0	0		0	0
946	3	2	1	33	1	5	1	1	1	2	2	1	1	2	1	1	0	0	0	0	0					0	0	1	0	0	0	0	0	0	0	0	0	0	0	0	0	0	0		0	0
947	3	1	1	63	2	3	1	1	1	1	2	1	1	3	0											0	0	2	0	0	0	0	0	0	0	0	1	0	0	0	0	0	1	2	1	1	92	6	0
948	3	1	1	44	1	5	0		1	3	1	0	3	1	1	1	0	0	1	0	1			1		0	0	2	0	0	0	0	0	0	0	0	0	0	0	0	0	0	0		0	0
949	3	1	1	60	2	2	1	1	1	1	1	1	1	2	0											0	0	2	0	0	0	0	1	0	0	0	0	0	0	1	1	0	1	2	1	1	74	41	1
950	3	2	1	55	1	2	1	1	1	1	1	1	1	3	1	0	0	0	1	0				0		1	0	3	0	0	0	0	0	0	0	0	0	0	0	0	0	0	1	3	1	0		34	0
951	3	1	2	71	2	1	1	1	1	1	2	1	1	3	1	0	1	0	0	0		0				0	0	2	0	0	0	0	0	0	0	0	0	0	0	0	1	0	1	1	1	1	42	75	1
952	3	1	1	65	2	8	1	1	1	1	1	1	1	2	1	0	1	0	0	0		0				0	0	2	0	0	0	0	0	1	0	0	0	0	0	0	0	0	1	1	1	1	36	80	1
953	3	2	2	65	2	8	1	1	1	2	1	1	1	2	1	1	0	0	1	0	0			0		0	0	3	0	1	0	0	0	0	0	0	0	0	0	0	0	0	1	2	1	1	84	31	1
954	3	1	1	66	2	2	1	1	1	1	1	1	1	2	0											0	1	2	0	0	0	0	0	0	0	0	0	0	0	0	1	0	1	1	1	1	33	75	1
955	3	2	1	45	1	4	1	1	1	1	1	1	1	2	1	1	0	0	0	0	0					0	0	2	0	0	0	0	0	0	0	0	0	0	0	0	0	0	0		0	0
956	3	1	2	43	1	5	1	1	1	1	1	1	1	2	0											1	1	1	0	0	1	1	0	1	0	0	0	0	0	0	0	0	1	3	1	0		21	0
957	3	1	2	73	2	5	1	1	1	1	2	1	1	3	0											0	0	3	0	0	0	0	0	1	0	0	0	1	0	1	0	0	1	1	1	1	21	105	1
958	3	1	2	42	1	5	1	1	1	1	1	1	1	3	1	0	1	0	0	0						0	0	2	1	1	1	1	1	1	1	1	1	1	1	0	0	0	1	2	1	0		19	0
959	3	2	2	60	2	4	1	1	1	1	1	1	1	2	0											0	0	2	0	0	0	0	0	0	0	0	0	0	0	0	0	0	1	2	1	1	81	21	1
960	3	1	2	36	1	5	1	1	1	1	2	1	1	3	0											1	0	3	0	0	0	0	0	0	0	0	0	0	0	0	0	0	1	1	1	0		31	0
961	3	1	2	66	2	8	1	1	1	1	2	1	1	2	0											0	0	2	0	0	0	0	0	0	0	0	0	0	0	1	1	0	1	1	1	1	28	87	1
962	3	2	1	43	1	1	1	1	1	1	1	1	1	2	0											0	0	2	0	0	0	0	0	0	0	0	0	0	0	0	0	0	0		0	0
963	3	1	2	71	2	3	1	1	1	1	1	1	1	2	0											0	0	2	0	0	0	0	0	0	0	0	0	0	0	0	0	1	1	1	1	1	28	98	1
964	3	1	2	37	1	8	1	1	1	2	1	1	2	2	0											0	0	2	0	0	0	0	0	0	0	0	0	0	0	0	0	0	1	3	1	0		24	0
965	3	1	1	64	2	2	1	1	1	1	2	1	1	3	0											0	0	1	0	1	0	0	0	0	0	0	0	0	0	1	1	0	1	2	1	1	84	21	1
966	3	2	1	66	2	4	1	1	1	1	1	1	1	2	0											0	0	2	0	0	0	0	0	0	0	0	0	0	0	0	0	0	1	1	1	1	91	19	1
967	3	2	1	40	1	7	1	1	1	2	2	1	1	1	1	1	0	0	0	0	1					1	0	1	0	0	0	0	0	1	0	0	1	0	0	0	0	0	1	2	1	0		60	0
968	3	1	1	33	1	4	1	1	1	1	2	1	1	2	0											0	0	2	0	0	0	0	0	0	0	0	0	0	0	0	0	0	0		0	0
969	3	1	2	47	1	8	1	1	1	1	2	1	1	3	1	1	0	0	0	0	0					0	0	1	0	0	0	0	0	0	0	0	0	0	0	0	0	0	0		0	0
970	3	1	2	42	1	7	1	1	1	1	2	1	1	2	1	1	0	0	1	0	0			0		0	0	1	0	1	0	0	0	0	0	0	0	0	0	1	0	0	1	3	1	0		10	0
971	3	2	1	49	1	3	1	1	1	2	2	1	2	2	0											0	0	3	0	0	0	0	0	0	0	0	0	0	0	0	0	0	1	2	1	0		43	0
972	3	1	1	51	1	2	1	1	1	1	1	1	2	2	0											0	0	2	0	0	0	0	0	0	0	0	0	0	0	0	0	0	1	2	1	0		28	0
973	3	1	1	34	1	5	1	1	1	1	2	1	1	3	0											0	0	3	0	1	0	0	0	1	0	0	0	0	0	0	0	0	0		0	0
974	3	2	2	60	2	2	0		0	1	1	1	1	2	0											0	0	2	0	0	0	0	0	0	0	0	0	0	0	1	0	0	1	2	1	1	92	5	0
975	3	1	2	25	1	2	1	1	1	1	2	1	1	1	0											1	0	2	0	1	0	0	0	1	0	1	0	1	0	1	0	0	0		0	0
976	3	1	2	31	1	2	1	1	1	1	2	1	1	3	0											1	0	3	0	1	0	0	1	0	0	1	1	0	0	0	0	0	0		0	0
977	3	1	2	27	1	7	1	0	1	1	1	1	1	1	1	0	0	0	1	0				0		0	0	1	1	1	1	1	1	1	1	1	1	1	1	0	0	0	0		0	0
978	3	1	2	67	2	2	1	1	1	1	2	1	1	2	1	1	0	0	0	0	0					1	0	2	0	0	0	0	0	0	1	0	0	1	0	1	0	0	1	1	1	1	31	85	1
979	3	1	2	69	2	4	1	1	1	1	1	1	1	2	1	0	1	0	0	0						1	0	2	1	1	0	0	1	1	1	1	1	0	0	1	0	0	1	1	1	1	20	106	1
980	3	1	1	82	2	8	1	1	1	1	2	1	1	2	1	0	0	0	1	0				0		0	0	1	0	0	0	0	0	0	0	0	0	0	0	0	1	0	1	2	1	1	92	58	1
981	3	1	2	53	1	2	1	1	1	1	2	1	1	2	0											0	0	2	0	0	0	0	0	0	0	0	0	0	0	0	0	0	1	3	1	0		39	0
982	3	1	2	39	1	4	1	1	1	1	2	1	1	1	1	1	1	0	1	0	1	1		1		0	0	1	0	1	0	0	0	1	0	0	0	1	0	0	0	0	0		0	0
983	3	1	1	42	1	2	1	1	1	1	1	1	1	2	0											0	0	2	0	0	0	0	0	0	0	0	0	0	0	0	0	0	0		0	0
984	3	1	2	67	2	3	1	0	1	1	1	1	1	2	1	0	0	0	1	0				0		0	0	1	0	0	0	0	0	0	0	0	0	0	0	1	0	0	1	1	1	1	28	21	1
985	3	1	1	56	1	5	1	1	1	1	1	1	1	1	0											0	0	1	0	0	0	0	0	0	0	0	0	0	0	1	1	0	1	2	1	0		69	0
986	3	1	2	53	1	1	1	1	1	1	2	1	1	2	1	0	0	0	1	0				0		1	0	2	0	0	0	0	0	0	0	0	1	0	0	1	0	0	0		0	0
987	3	1	2	47	1	5	1	1	1	1	2	1	3	1	1	1	0	0	0	0	1					0	0	2	0	0	0	0	0	0	0	0	0	0	0	0	0	0	1	1	1	0		25	0
988	3	1	1	41	1	7	1	0	1	1	2	1	1	1	1	0	0	0	1	0				1		0	0	1	0	0	0	0	0	0	0	0	0	0	0	0	0	1	1	2	1	1	95	5	0
989	3	1	2	75	2	4	1	1	1	1	1	1	1	2	0											0	0	2	0	0	0	0	0	0	0	0	0	0	0	1	0	0	1	1	1	1	21	106	1
990	3	1	2	62	2	4	1	1	1	1	1	1	1	2	0											0	0	2	0	0	0	0	0	0	0	0	0	0	0	1	0	0	1	2	1	1	84	20	1
991	3	1	2	33	1	2	1	1	1	1	2	1	1	3	0											1	0	1	0	1	1	0	1	1	1	1	1	1	0	0	1	0	1	3	1	0		43	0
992	3	1	2	38	1	2	1	1	1	2	2	1	2	3	0											1	0	3	0	1	0	0	0	1	0	0	1	0	0	1	0	0	1	2	1	0		13	0
993	3	1	2	55	1	3	0		1	1	1	1	1	2	0											0	0	2	0	0	0	0	0	0	0	0	0	0	0	0	0	0	1	3	1	0		27	0
994	3	1	1	71	2	5	1	1	1	1	2	1	1	2	0											1	0	2	0	0	0	0	0	0	0	0	0	0	0	1	0	0	1	1	1	1	21	105	1
995	3	1	1	38	1	2	1	1	1	1	2	1	1	3	0	0	0	0	1	0						0	0	2	1	1	1	1	0	1	1	1	0	0	1	1	0	0	1	1	1	0		6	0
996	3	1	1	63	2	3	1	1	1	1	2	1	1	3	0											0	0	2	0	0	0	0	0	0	0	0	0	0	0	0	0	0	1	2	1	1	84	21	1
997	3	1	2	44	1	5	0		0	1	1	1	1	2	0											0	0	2	0	0	0	0	0	0	0	0	0	0	0	0	0	0	1	3	1	0		22	0
998	3	1	2	37	1	4	1	1	1	1	2	1	1	2	0											0	0	2	0	0	0	0	0	0	0	0	0	0	0	0	0	1	1	3	1	0		36	0
999	3	1	2	36	1	2	1	1	1	1	2	1	1	3	0											0	0	2	0	1	0	1	1	0	0	1	1	0	0	0	0	0	0		0	0
1000	3	1	2	39	1	5	1	1	1	1	1	1	1	2	1	1	0	0	1	0				0		0	0	2	0	0	0	0	0	0	0	0	0	0	0	0	0	0	1	4	1	0		26	1
1001	3	1	2	72	2	2	1	1	1	1	2	1	1	3	0											0	0	2	0	1	0	0	0	1	0	1	0	0	0	1	0	0	1	1	1	1	20	106	1
1002	3	1	1	77	2	3	1	1	1	1	2	1	1	3	0											0	0	2	0	0	0	0	0	0	0	0	0	0	0	1	0	0	1	1	1	1	24	120	1
1003	3	1	2	70	2	5	1	1	1	1	1	1	1	2	0											0	0	1	0	0	0	0	0	0	0	0	0	0	0	0	0	0	1	1	1	1	35	85	1
1004	3	1	2	36	1	8	0		0	1	1	1	1	2	0											0	0	1	0	0	0	0	0	0	0	0	0	0	0	0	0	0	1	3	1	0		15	0
1005	3	1	2	30	1	9	1	1	1	1	2	1	1	1	1	0	1	0	0	0		1				0	0	1	0	1	0	0	0	0	0	0	1	0	0	0	0	0	1	2	1	0		54	0
1006	3	1	1	66	2	2	1	0	1	1	2	1	1	2	0											0	0	2	0	0	0	0	0	0	0	0	1	0	0	1	0	0	1	1	1	1	33	76	1
1007	3	1	2	69	2	2	1	1	1	1	1	1	1	2	0											0	0	2	0	0	0	0	0	0	0	0	0	0	0	1	0	0	1	1	1	1	28	92	1
1008	3	1	2	70	2	4	1	1	1	1	1	1	1	2	0											0	0	2	0	0	0	0	0	0	0	0	0	0	0	0	1	0	1	1	1	0		126	0
1009	3	1	1	62	2	8	1	1	1	1	2	1	1	2	0											0	0	2	0	0	0	0	0	0	0	0	0	0	0	0	0	0	1	2	1	1	84	25	1
1010	3	1	1	60	2	5	1	1	1	1	2	1	1	2	0											0	0	2	0	0	0	0	0	0	0	0	0	0	0	0	0	0	0		0	0
1011	3	1	1	49	1	3	1	1	1	1	1	1	1	2	0											0	0	2	0	0	0	0	0	0	0	0	0	0	0	0	0	0	1	2	1	0		20	0
1012	3	1	1	66	2	3	1	1	1	1	1	1	1	2	0											0	0	2	0	0	0	0	0	0	0	0	0	0	0	1	0	0	1	1	1	1	35	76	1
1013	3	1	1	23	1	5	1	0	1	1	2	1	1	3	0											0	0	1	0	0	0	0	0	0	0	0	0	0	0	0	0	0	0		0	0
1014	3	1	1	65	2	1	1	1	1	1	2	1	1	3	0											1	0	3	0	0	0	0	1	1	1	0	0	0	0	1	0	0	1	1	1	1	33	76	1
1015	3	1	2	68	2	2	1	1	1	1	2	1	2	2	0											1	0	2	0	0	0	0	0	0	0	0	1	0	0	1	1	0	1	1	1	1	40	78	1
1016	3	1	2	63	2	5	1	1	1	1	2	1	1	2	1	0	0	0	1	0				0		0	0	2	0	0	0	0	0	0	0	0	0	0	0	1	0	0	1	2	1	1	89	15	1
1017	3	1	1	22	1	5	1	0	1	1	1	1	1	3	0											0	0	2	0	0	1	1	0	0	0	0	0	0	0	0	0	0	0		0	0
1018	3	1	2	58	1	2	1	1	1	2	2	1	2	2	1	1	0	0	0	0	0					1	0	2	0	0	0	0	0	0	0	0	1	0	0	1	0	0	1	2	1	1	80	18	1
1019	3	1	2	74	2	1	1	1	1	1	2	1	1	3	0											0	0	3	0	0	0	0	0	1	0	0	0	0	0	1	1	0	1	2	1	1	74	25	1
1020	3	1	2	52	1	5	1	1	1	1	1	1	1	2	0											1	0	2	0	0	0	0	1	0	0	0	1	0	0	1	0	0	1	2	1	1	62	22	1
1021	3	1	2	64	2	5	1	1	1	1	2	1	1	3	0											1	0	2	0	1	0	0	0	0	1	0	0	0	0	0	0	0	1	2	1	1	84	22	1
1022	3	1	2	39	1	2	1	1	1	1	2	1	1	1	1	1	0	0	0	0	1					0	0	1	0	1	0	0	0	0	0	0	1	0	0	1	0	0	1	4	1	0		20	1
1023	3	1	1	60	2	5	1	1	1	1	1	1	1	2	1	0	1	0	0	0		0				0	0	1	0	0	0	0	0	1	1	0	0	0	0	0	0	0	1	2	1	0		60	0
1024	3	1	1	57	1	5	1	1	1	2	1	1	2	2	1	0	1	0	0	0		0				0	0	2	0	0	0	0	0	0	0	0	0	0	0	1	1	0	1	2	1	0		84	0
1025	3	1	2	53	1	8	1	1	1	1	2	1	1	1	1	0	0	0	1	0				1		0	0	2	0	0	0	0	0	0	0	0	0	0	0	0	0	0	1	3	1	0		34	0
1026	3	1	2	41	1	8	1	1	1	1	2	1	1	3	0											1	0	1	0	0	0	0	0	0	0	0	1	0	0	0	0	0	1	2	1	0		8	0
1027	3	1	2	45	1	5	1	1	1	1	1	1	1	2	0											0	0	2	0	0	0	0	0	0	0	0	0	0	0	0	0	0	1	2	1	1	84	53	1
1028	3	1	1	19	1	5	1	1	1	1	2	1	1	2	0											0	0	2	0	1	0	0	0	0	0	0	0	0	0	0	0	0	0		0	0
1029	3	1	2	49	1	5	1	1	1	1	2	1	1	2	0											0	0	2	0	0	0	0	0	0	0	0	0	0	0	1	0	0	1	2	1	0		29	0
1030	3	1	1	24	1	4	0		1	1	1	1	1	2	0											1	0	2	0	0	0	0	0	0	0	0	0	0	0	0	0	0	0		0	0
1031	3	1	2	56	1	7	1	1	1	1	1	1	1	2	0											0	0	2	0	0	0	0	0	0	0	0	0	0	0	0	0	0	1	2	1	0		82	0
1032	3	1	2	79	2	5	0		1	1	2	1	1	3	0											0	0	2	0	0	1	1	0	1	0	1	1	0	0	1	0	0	1	1	1	1	21	109	1
1033	3	1	2	30	1	5	1	1	1	1	2	1	1	2	0											1	0	2	0	0	0	0	0	0	0	0	1	0	0	0	0	1	1	2	1	0		48	0
1034	3	1	2	69	2	2	1	1	1	1	2	1	1	2	0											0	0	2	0	0	0	0	0	0	0	0	0	0	0	1	1	0	1	1	1	1	36	85	1
1035	3	1	2	63	2	3	1	1	1	1	2	1	1	3	0											0	0	3	0	0	0	0	0	0	0	0	1	0	0	1	0	0	1	2	1	1	84	21	1
1036	3	1	1	65	2	5	1	1	1	2	1	1	2	2	0											1	1	2	0	0	0	0	0	0	0	0	1	0	0	1	0	0	1	1	1	1	33	77	1
1037	3	1	2	40	1	5	1	0	1	1	1	1	1	2	1	0	0	0	1	0				0		0	0	1	0	0	1	0	0	0	0	0	0	0	0	0	0	0	1	4	1	0		21	1
1038	3	1	1	33	1	2	0		1	1	2	1	1	3	0											1	0	2	0	1	0	0	1	1	1	1	1	0	0	0	0	0	0		0	0
1039	3	1	2	63	2	5	1	1	1	1	2	1	1	2	1	0	0	0	1	0				0		0	0	2	0	1	0	0	0	0	0	0	0	0	0	0	0	0	1	2	1	1	85	21	1
1040	3	1	2	68	2	2	1	1	1	1	1	1	1	2	0											0	0	2	0	0	0	0	0	0	0	0	0	0	0	0	0	0	1	1	1	1	36	78	1
1041	3	1	2	79	2	3	1	1	1	1	1	1	1	1	0											1	0	2	1	1	1	1	1	1	1	1	1	0	0	0	1	0	1	1	1	1	24	110	1
1042	3	1	1	64	2	2	1	1	1	2	2	1	3	2	0											0	0	2	0	0	0	0	0	0	0	0	0	0	0	0	0	0	1	2	1	1	84	23	1
1043	3	1	2	46	1	4	1	1	1	1	2	1	1	3	0											0	0	2	0	0	0	0	0	0	0	0	0	0	0	1	1	0	1	3	1	0		28	0
1044	3	1	2	35	1	2	1	1	1	1	2	1	1	3	0											0	0	3	0	0	0	0	0	0	0	0	0	0	0	0	0	0	1	1	1	0		7	0
1045	3	1	2	35	1	8	1	1	1	1	1	1	1	2	0											0	0	3	0	0	0	0	0	0	0	0	0	0	0	0	0	0	1	2	1	0		69	0
1046	3	1	1	71	2	1	0		0	2	1	1	1	2	0											0	0	2	0	0	0	0	0	0	0	0	0	0	0	1	0	0	1	1	1	1	20	107	1
1047	3	1	2	65	2	2	1	1	1	1	2	1	1	2	0											0	0	2	0	0	0	0	0	1	0	1	0	0	0	0	0	0	1	1	1	1	25	86	1
1048	3	1	1	56	1	5	1	1	1	2	2	1	3	2	1	1	0	0	1	0	0			0		0	0	2	0	0	0	0	0	0	0	0	0	0	0	0	0	0	0		0	0
1049	3	1	1	46	1	5	1	0	1	1	1	1	1	2	1	0	1	0	0	0						0	0	1	0	0	0	0	0	0	0	0	0	0	0	1	0	0	1	2	1	0		65	0
1050	3	1	2	40	1	2	1	1	1	1	2	1	1	3	0											0	0	3	0	1	0	0	0	0	0	0	0	1	0	1	1	0	1	2	1	0		58	0
1051	3	1	2	48	1	2	1	1	1	1	1	1	2	2	0											0	0	2	0	0	0	0	0	0	0	0	0	0	0	1	0	0	1	2	1	1	61	8	0
1052	3	1	1	32	1	8	1	1	1	1	2	1	1	3	1	0	1	0	0	0		0				1	0	2	0	1	0	0	0	0	0	0	1	0	0	0	0	0	1	2	1	0		79	0
1053	3	1	2	80	2	2	1	1	1	2	2	1	1	2	1	0	1	0	0	0		0				1	0	2	0	0	0	0	0	1	0	0	1	0	0	1	0	0	1	1	1	1	26	121	1
1054	3	1	2	66	2	9	1	1	1	1	1	1	2	2	0											0	0	2	0	0	0	0	0	0	0	0	0	0	0	0	0	0	1	1	1	1	28	89	1
1055	3	1	1	66	2	5	1	1	1	1	1	1	1	2	1	1	0	0	0	0	0					1	0	2	0	0	0	0	0	0	0	0	0	0	0	1	0	1	1	2	1	0		84	0
1056	3	1	2	18	1	5	1	1	1	1	2	1	1	2	1	0	0	0	1	0				0		1	0	2	0	1	0	0	0	1	1	0	0	0	0	0	0	0	0		0	0
1057	3	1	2	39	1	2	1	1	1	2	2	1	2	2	0											0	0	2	0	0	0	0	0	0	0	0	0	0	0	0	0	0	1	1	1	0		7	0
1058	3	1	2	66	2	2	1	1	1	1	1	1	1	2	0											0	0	2	0	0	0	0	0	0	0	0	0	0	0	0	0	0	1	1	1	1	34	77	1
1059	3	1	1	68	2	2	1	1	1	1	2	1	1	2	1	0	0	0	1	0				0		1	0	2	0	0	0	0	1	0	0	0	1	1	0	1	0	0	1	1	1	1	31	86	1
1060	3	1	1	24	1	7	1	1	1	1	2	1	1	2	0											0	0	2	0	0	0	0	0	0	0	0	0	0	0	0	1	0	1	2	1	0		72	0
1061	3	1	2	19	1	5	1	1	1	1	2	1	1	3	0											0	0	3	0	0	0	0	0	0	0	0	0	0	0	0	0	0	0		0	0
1062	3	1	2	64	2	2	1	1	1	2	2	1	3	2	1	0	1	0	0	0		0				0	0	1	0	0	0	0	0	0	0	0	0	0	0	0	1	0	1	2	1	1	84	23	1
1063	3	1	1	55	1	8	1	1	1	1	1	1	1	2	1	1	0	0	0	0	0					0	0	2	0	0	0	0	0	0	0	0	0	0	0	1	0	1	1	2	1	0		55	0
1064	3	1	2	41	1	8	1	1	1	1	2	1	1	3	0											0	0	1	0	0	0	0	0	0	0	0	0	0	0	0	0	0	1	2	1	0		42	0
1065	3	1	2	45	1	4	0		1	1	1	1	1	2	0											0	0	2	0	0	0	0	0	0	0	0	0	0	0	0	0	0	1	1	1	0		26	0
1066	3	1	1	65	2	2	1	1	1	1	2	1	3	2	0											1	0	2	0	0	0	0	0	0	0	0	0	0	0	0	0	0	1	1	1	1	33	77	1
1067	3	1	1	56	1	5	1	0	1	1	1	1	1	2	0											1	0	1	1	1	1	1	1	1	1	1	1	0	0	0	1	0	1	2	1	1	71	20	1
1068	3	1	2	45	1	8	1	1	1	1	2	1	1	3	0											0	0	3	0	0	0	0	0	0	0	0	0	0	0	0	0	0	1	2	1	0		35	0
1069	3	1	2	47	1	5	1	1	1	1	1	1	2	2	0											0	0	2	0	0	0	0	0	0	0	0	0	0	0	1	1	0	1	2	1	0		75	0
1070	3	1	2	68	2	1	1	1	1	1	1	1	1	2	1	1	1	0	0	0	0	0				1	0	1	0	0	0	0	0	0	0	0	0	0	0	1	0	0	1	1	1	1	31	86	1
1071	3	1	2	55	1	2	1	1	1	1	1	1	1	2	0											0	0	2	0	0	0	0	0	0	0	0	0	0	0	0	0	0	1	2	1	0		43	0
1072	3	1	2	58	1	5	1	1	1	1	2	1	1	2	1	0	1	0	1	0						0	0	2	0	0	0	0	0	0	0	0	0	0	0	1	0	0	1	2	1	1	76	16	1
1073	3	1	1	68	2	2	1	1	1	1	1	1	1	2	0											0	0	2	0	0	0	0	0	0	0	0	0	0	0	0	0	0	1	1	1	1	28	86	1
1074	3	1	2	46	1	9	1	1	1	1	1	1	1	1	1	1	0	0	1	0	1			1		0	0	2	0	1	0	0	0	0	0	0	1	0	0	0	0	0	1	2	1	0		36	0
1075	3	1	1	50	1	9	1	1	1	1	1	1	1	2	0											0	0	2	0	0	0	0	0	0	0	0	0	0	0	0	0	0	1	2	1	0		86	0
1076	3	1	1	51	1	5	1	1	1	2	2	1	3	2	0											0	0	2	0	0	0	0	0	0	0	0	0	0	0	1	0	0	1	2	1	0		16	0
1077	3	1	1	31	1	5	1	0	1	1	1	1	1	2	0											0	0	2	0	0	0	0	0	0	0	0	0	0	0	0	0	0	0		0	0
1078	3	1	2	60	2	5	1	1	1	1	2	1	1	2	1	0	0	0	1	0				0		1	0	2	0	0	0	0	1	1	1	1	1	0	0	0	0	0	1	2	1	0		55	0
1079	3	1	1	31	1	4	0		0	2	1	1	1	2	0											0	0	2	0	0	0	0	0	0	0	0	0	0	0	0	0	0	0		0	0
1080	3	1	2	30	1	5	1	1	1	1	2	1	2	2	0											0	0	2	0	0	0	0	0	0	0	0	0	0	0	0	0	0	0		0	0
1081	3	1	1	56	1	8	1	1	1	1	2	1	1	2	1	0	1	0	0	0		0				0	0	2	0	0	0	0	0	0	0	0	0	0	0	0	0	0	1	2	1	1	97	16	1
1082	3	1	2	25	1	2	1	1	1	1	2	1	1	3	0											0	0	3	0	0	1	1	1	1	1	1	1	1	1	0	0	0	1	3	1	0		29	0
1083	3	1	2	50	1	2	1	1	1	1	1	1	1	2	0											0	0	2	0	0	0	0	0	0	0	0	0	0	0	0	0	0	1	2	1	0		43	0
1084	3	1	2	68	2	5	1	0	1	1	1	1	2	2	1	1	0	0	0	0	0					0	0	2	0	0	0	0	0	0	0	0	0	0	0	0	1	1	1	1	1	1	43	71	1
1085	3	1	2	67	2	2	1	1	1	1	2	1	1	2	1	0	0	1	0	0			0			1	0	2	0	1	0	0	1	1	1	0	1	1	0	1	1	0	1	2	1	0		91	0
1086	3	1	1	44	1	3	1	0	1	1	2	1	1	3	0											0	0	2	0	0	0	0	0	0	0	0	0	0	0	0	0	0	0		0	0
1087	3	1	2	54	1	5	1	1	1	1	1	1	1	2	0											0	0	2	0	0	0	0	1	0	0	0	0	0	0	1	0	0	1	3	1	0		14	0
1088	3	1	1	42	1	6	1	1	1	1	2	1	1	2	0											0	0	2	0	0	0	0	0	0	0	0	0	0	0	0	0	1	1	1	1	1	28	7	0
1089	3	1	2	33	1	5	1	1	1	1	1	1	1	2	0											0	0	3	0	0	0	0	0	0	0	0	0	0	0	1	0	0	0		0	0
1090	3	1	1	34	1	4	1	1	0	1	2	1	1	3	1	0	1	0	0	0		0				0	1	1	0	0	0	0	0	0	0	0	0	0	0	0	0	0	1	3	1	0		35	0
1091	3	1	2	39	1	5	0		1	1	1	1	2	2	0											0	0	2	0	0	0	0	0	0	0	0	0	0	0	0	0	0	1	2	1	0		36	0
1092	3	1	2	53	1	5	1	1	1	1	1	1	1	1	1	1	0	0	1	0	1			1		0	0	1	0	0	0	0	0	0	0	0	0	0	0	1	0	0	1	2	1	1	91	20	1
1093	3	1	1	25	1	5	0		1	2	1	1	2	2	0											0	0	2	0	0	0	0	0	0	0	0	0	0	0	0	0	0	0		0	0
1094	3	2	2	70	2	3	1	1	1	1	1	1	1	2	0											0	0	2	0	0	0	0	0	0	0	0	0	0	0	0	0	0	1	1	1	1	21	101	1
1095	3	1	2	76	2	2	0		1	1	1	1	1	2	0											0	0	2	0	0	0	0	0	0	0	0	0	0	0	1	0	0	1	1	1	1	38	79	1
1096	3	2	1	72	2	8	1	1	1	1	2	1	1	2	0											1	0	2	0	0	0	0	0	0	0	0	0	0	0	1	0	0	1	2	1	0		22	0
1097	3	2	2	62	2	6	1	1	1	1	2	1	1	2	0											0	0	2	0	0	0	0	0	0	0	0	0	0	0	0	0	0	1	2	1	1	84	22	1
1098	3	2	1	42	1	5	1	0	1	1	1	1	1	1	1	0	1	0	0	0						0	0	1	1	1	1	1	1	1	1	1	1	0	0	0	0	0	0		0	0
1099	3	1	1	75	2	3	1	1	1	1	2	1	1	2	0											0	0	2	0	0	0	0	0	0	0	0	0	0	0	1	1	0	1	1	1	1	20	120	1
1100	3	2	1	56	1	5	1	1	1	1	2	1	2	2	0											0	0	2	0	0	0	0	0	0	0	0	0	0	0	1	0	0	1	2	1	0		92	0
1101	3	1	2	63	2	7	1	1	1	1	1	1	1	2	0											0	0	2	0	0	0	0	0	0	0	0	0	0	0	0	0	0	1	2	1	1	84	23	1
1102	3	1	2	60	2	5	1	1	1	1	2	1	1	1	1	1	0	0	1	0	0			0		0	0	1	0	1	0	0	0	0	0	0	0	0	0	1	0	0	1	2	1	1	65	21	1
1103	3	2	2	50	1	6	1	1	1	1	2	1	2	2	0											0	0	2	0	0	0	0	0	0	0	0	0	0	0	0	0	0	1	2	1	0		34	0
1104	3	1	1	21	1	6	1	1	1	1	1	1	1	2	0											1	1	2	0	0	0	0	0	0	0	0	0	0	0	0	0	0	0		0	0
1105	3	1	2	54	1	2	1	1	1	1	1	1	1	2	0											0	0	2	0	0	0	0	0	0	0	0	0	0	0	0	0	0	1	3	1	0		37	0
1106	3	1	2	50	1	5	1	1	1	1	2	1	1	3	1	1	0	0	0	0						1	0	2	0	1	0	0	1	1	1	0	1	1	1	0	0	0	1	2	1	0		11	0
1107	3	1	2	40	1	8	1	1	1	1	1	1	1	2	0											1	0	2	0	0	0	0	0	0	0	0	0	0	0	0	0	1	1	2	1	1	91	14	1
1108	3	2	2	34	1	6	1	1	1	1	2	1	1	2	1	0	0	0	1	0				0		1	0	2	0	0	0	0	0	0	0	0	0	0	0	0	0	0	1	1	1	0		3	0
1109	3	1	2	34	1	7	1	1	1	1	1	1	1	2	0											0	0	2	0	0	0	0	0	0	0	0	0	0	0	0	0	0	1	3	1	0		43	0
1110	3	1	2	38	1	5	1	1	1	1	2	1	1	2	0											0	0	2	0	1	0	0	0	0	1	0	1	0	0	0	1	0	1	1	1	0		8	0
1111	3	1	1	86	2	5	1	1	1	1	1	1	1	2	0											0	0	2	0	0	0	0	0	0	0	0	0	0	0	1	0	0	1	1	1	1	17	139	1
1112	3	1	1	31	1	2	0		1	1	1	1	1	2	0											0	0	2	0	0	0	0	0	0	0	0	0	0	0	0	0	0	0		0	0
1113	3	1	1	65	2	5	1	1	1	1	2	1	1	1	0											0	0	1	0	0	0	0	0	0	0	0	0	0	0	1	0	0	1	1	1	1	33	78	1
1114	3	1	1	35	1	5	0		0	1	1	1	1	1	0											0	0	2	1	1	1	1	1	1	1	1	1	0	0	0	0	0	1	2	1	0		56	0
1115	3	1	2	33	1	8	1	1	1	1	1	1	1	2	0											0	0	2	0	0	0	0	0	0	0	0	0	0	0	0	0	0	1	2	1	0		70	0
1116	3	1	2	62	2	5	1	1	1	1	1	1	1	1	1	0	1	0	0	0		1				0	0	2	1	1	1	1	1	1	1	1	1	0	0	0	0	0	1	1	1	1	24	158	1
1117	3	1	2	71	2	5	1	1	1	1	2	1	1	3	1	0	0	0	1	0				0		0	0	1	0	0	0	0	0	0	0	0	0	0	0	1	0	0	1	1	1	1	28	110	1
1118	3	1	1	43	1	8	0		1	1	2	1	1	3	0											0	0	2	0	1	0	0	0	0	0	0	0	0	0	0	0	0	1	3	1	0		24	0
1119	3	1	2	72	2	3	1	1	1	1	2	1	1	2	0											0	0	2	0	0	0	0	0	0	0	0	0	0	0	0	0	0	1	1	1	1	28	110	1
1120	3	1	2	70	2	8	1	1	1	1	2	1	2	2	0											0	0	2	0	0	0	0	0	0	0	0	0	0	0	0	0	0	1	2	1	1	88	97	1
1121	3	1	2	45	1	7	1	1	1	1	2	1	1	2	1	1	0	0	0	0	0					0	0	2	0	0	0	0	0	0	1	0	0	0	0	0	0	0	1	3	1	0		24	0
1122	3	1	1	47	1	8	1	1	1	1	2	1	1	2	1	0	0	0	1	0				0		0	0	3	0	0	0	0	0	0	0	0	0	0	0	1	0	0	1	2	1	1	55	14	1
1123	3	1	2	49	1	8	1	1	1	1	1	1	2	1	1	1	0	0	0	0	1					1	0	2	0	1	0	0	1	1	1	1	1	0	0	1	1	1	1	3	1	0		41	0
1124	3	1	1	47	1	8	0		1	1	1	1	1	2	1	0	0	0	1	0				0		0	0	2	0	0	0	0	0	0	0	0	0	0	0	0	0	0	1	2	1	1	60	9	0
1125	3	1	1	86	2	5	1	1	1	1	1	1	1	2	0											0	0	2	0	0	0	0	0	0	0	0	0	0	0	0	0	0	1	1	1	1	51	102	1
1126	3	1	1	21	1	7	1	1	1	1	1	1	1	2	0											1	0	2	0	0	0	0	0	0	0	0	0	0	0	0	0	0	0		0	0
1127	3	1	2	76	2	4	0		1	1	1	1	1	2	0											0	0	2	0	0	0	0	0	0	0	0	0	0	0	0	0	0	1	1	1	1	21	108	1
1128	3	1	1	38	1	8	1	1	1	1	1	1	1	2	0											0	0	2	0	0	0	0	0	0	0	0	0	0	0	0	0	0	1	1	1	0		9	0
1129	3	1	1	68	2	8	1	1	1	1	1	1	1	2	0											0	0	2	0	0	0	0	0	0	0	0	0	0	0	1	0	0	1	1	1	1	32	87	1
1130	3	1	2	30	1	8	1	1	1	2	2	1	1	2	0											0	0	2	0	0	0	0	0	0	0	0	0	0	0	0	0	1	1	3	1	0		70	0
1131	3	2	2	57	1	7	1	1	1	1	2	1	1	2	1	0	0	0	1	0				0		1	0	2	0	1	0	0	1	0	0	0	1	0	0	1	0	0	1	1	1	1	21	92	1
1132	3	1	1	20	1	7	0		1	1	1	1	1	2	0											0	0	2	0	0	0	0	0	0	0	0	0	0	0	0	0	0	0		0	0
1133	3	1	2	27	1	8	0		0	1	1	1	1	2	0											0	0	2	0	0	0	0	0	0	0	0	0	0	0	0	0	0	1	2	1	1	61	16	1
1134	3	1	2	71	2	2	0		1	1	1	1	1	2	0											0	0	2	0	0	0	0	0	0	0	0	0	0	0	0	0	0	1	1	1	1	21	107	1
[truncated: 19 more columns]

## Sheet: GLOSSARY
CODE	MEANING	CATEGORY	REFERENCE VALUES
SUBJECT	Subject	numeric
ROUND	Round	1 - 1st round; 2 - 2nd round; 3 - 3rd round
DISTRICT	Subject´s district	1 - Inoã; 2 - Maricá; 3 - Manoel Ribeiro
GENDER	Subject´s gender	1-Male; 2-Female
AGE	Subject´s age at interview	Age (years old)
AGE_CAT	Age Group	1 - <60 years; 2 - >=60 years
SCHOOLING	Subject´s schooling	1 - No schooling; 2 - Incomplete junior high; 3 - Complete junior high; 4 - Incomplete high school; 5 - Complete High school; 6 - Technician school; 7 - Under graduated; 8 - Graduated; 9 - Postgraduation and specialization
LOCK_DOWN_1	Has the subject been in lock down?	0 - no; 1 - yes
LOCK_DOWN_2	Does the subject keep in lock doewn?	0 - no; 1 - yes
MASK_1	Did the subject use mask?	0 - no; 1 - yes
MASK_2	How often the subject use mask?	1 - always; 2 - sometimes; 3 - rarely; 4 - does not have mask
HAND	How often the subject wash his hands?	1 - until 3 times; 2 - 4 times or more
ALCOHOL_1	Did the subject gel alcohol?	0 - no; 1 - yes
ALCOHOL_2	How often the subject use gel alcohol?	1 - always; 2 - sometimes; 3 - rarely; 4 - does not use
SUBJ_COVID_1	Did the subject has COVID?	1 - yes; 2 - no; 3 - does not know
COVID_TEST	Has the subject already been tested for COVID?	0 - no; 1 - yes
PCR_TEST	PCR test	0 - no; 1 - yes
IGG_TEST	Blood drop test	0 - no; 1 - yes
ANTIGEN_TEST	Antigen test	0 - no; 1 - yes
CLIA	CLIA for anti-COVID IgG and/or IgM	0 - no; 1 - yes
CLINIC_DIAG	Clinical diagnosis	0 - no; 1 - yes
PCR_RES	PCR test result	1 - negative; 2 - undeterminated; 3 - positive
IGG_RES	Blood drop test result	1 - negative; 2 - undeterminated; 3 - positive
ANTIGEN_RES	Antigen test result	1 - negative; 2 - undeterminated; 3 - positive
CLIA_RES	ELISA for anti-COVID IgG and/or IgM result	1 - negative; 2 - undeterminated; 3 - positive
CLINIC_DIAG_RES	Clinical diagnosis result	1 - negative; 2 - undeterminated; 3 - positive
SYMPT	Did the subject has SARS symptoms	0 - no; 1 - yes
HOSPIT	Was the subject hospitalized due to COVID?	0 - no; 1 - yes
RELAT	Did the subject´s relative (cohabiting the holdhose) has COVID?	1 - yes; 2 - no; 3 - does not know
FEVER	Did the subject has fever?	0 - no; 1 - yes
HEADACHE	Did the subject has headache?	0 - no; 1 - yes
AGEUSIA	Did the subject has ageusia?	0 - no; 1 - yes
ANOSMIA	Did the subject has anosmia?	0 - no; 1 - yes
COUGH	Did the subject has cough?	0 - no; 1 - yes
BODY_ACHE	Did the subject has body ache?	0 - no; 1 - yes
SORE_THROAT	Did the subject has sore throat?	0 - no; 1 - yes
DIZZINESS	Did the subject has dizziness?	0 - no; 1 - yes
CORYZA	Did the subject has coryza?	0 - no; 1 - yes
DIARRHEA	Did the subject has diarrhea?	0 - no; 1 - yes
VOMIT	Did the subject has vomit?	0 - no; 1 - yes
HYPER	Has the subject been medicated for hypertension?	0 - no; 1 - yes
DIABETES	Has the subject been medicated for hypertension?	0 - no; 1 - yes
RESP	Has the subject been medicated for asthma or bronchitis?	0 - no; 1 - yes
VACCINE	Was the subject vaccinated for SARS-CoV-2?	0 - no; 1 - yes
VAC_TYPE	If yes, wich vaccine?	1 - CORONAVAC; 2 - ASTRAZENECA; 3 - PFIZER; 4 - JANSSEN; 5 - OTHER
1ST_JAB	Did the subject take the first jab?	0 - no; 1 - yes
2ND_JAB	Did the subject take the second jab?	0 - no; 1 - yes
DAYS_BJAB	Days between jabs	number of days
DAYS_LJAB	Days after the last jab	number of days
FULL_IMMU	Was the subject full immunized?	1 - >= a 14 days after the 2nd jab
VAC_SEFC	Did the subject have any vaccine side effect?	0 - no; 1 - yes
VAC_FEVER	Did the subject has fever?	0 - no; 1 - yes
VAC_BACHE	Did the subject has body ache?	0 - no; 1 - yes
VAC_SOMNO	Did the subject has somnolence?	0 - no; 1 - yes
VAC_HACHE	Did the subject has headache?	0 - no; 1 - yes
VAC_LPAIN	Did the subject has local pain?	0 - no; 1 - yes
VAC_SWELL	Did the subject has local swelling?	0 - no; 1 - yes
CLIA	Overall CLIA result	1 - negative; 2 - undeterminated; 3 - positive
IGM_RES	IgM result	0 - negative; 1 - positive	>=1 - positive
IGM_S/CO	Sample sign-to-cutoff ratio	value
IGG_RES	IgG result	1 - negative; 2 - undeterminated; 3 - positive	>=0,8 and <1 - undeterminated; >=1 - positive
IGG_S/CO	Sample sign-to-cutoff ratio	value
NEUT_IGG	Neutralizing antibody result	0 - negative; 1 - positive	<=30% - positive
NT_%	Sample neutralizing antibody percentage	value
NT_%_ADJ	Adjusted sample neutralizing antibody percentage	value
PCR_RES	RT-PCR result	1 - negative; 2 - undeterminated; 3 - positive	N1 or N2 <38 - undeterminated; N1 and N2 <38 - positive
CT_N1	CT N1 target	value
CT_N2	CT N2 target	value
CT_RP	CT RP target	value
